# Supplementary material for: Two pyrene-based cagearene constitutional isomers: synthesis, separation, and host–guest chemistry
Source: Royal Society of Chemistry journal article supplement (doi:10.1039/d4qo01142b), 2024-01-01
Supplement: d4qo01142b1.pdf [file d4qo01142b1.pdf]

## Electronic Supplementary Information

### Two pyrene-based cagearene constitutional isomers: synthesis, separation, and host–guest chemistry

Yating Li,<sup>a‡</sup> Shang Li,<sup>a‡</sup> Mengbin Wang,<sup>b</sup> Li Shao,<sup>c</sup> Shuai Fang,<sup>\*a</sup> Bin Hua<sup>\*a,b</sup> and  
Feihe Huang<sup>\*a,b</sup>

<sup>a</sup>*Stoddart Institute of Molecular Science, Department of Chemistry, Zhejiang University,  
Hangzhou 310058, P. R. China. Email addresses: fangshuai123@zju.edu.cn;  
huabin@zju.edu.cn; fhuang@zju.edu.cn; Fax and Tel: +86-571-8795-3189.*

<sup>b</sup>*Zhejiang-Israel Joint Laboratory of Self-Assembling Functional Materials, ZJU-Hangzhou  
Global Scientific and Technological Innovation Center, Zhejiang University, Hangzhou  
311215, P. R. China*

<sup>c</sup>*Department of Materials Science and Engineering, Zhejiang Sci-Tech University, Hangzhou  
310018, P. R. China*

### Table of Contents

|                                                                  |     |
|------------------------------------------------------------------|-----|
| 1. General information                                           | S1  |
| 2. Synthesis of cagearenes                                       | S2  |
| 3. X-ray single crystal diffraction data of <b>PC-P</b>          | S13 |
| 4. UV-Vis absorption spectra and quantum yield calculations      | S15 |
| 5. Investigation of host–guest complexation behavior in solution | S17 |
| 6. Computational analysis                                        | S27 |
| 7. References                                                    | S75 |

## ***1. General information***

All reagents including guest compounds and solvents were purchased from commercial sources and used without further purification. **P-1** was prepared according to a reported procedure.<sup>S1</sup> NMR spectra were recorded on a Bruker AVANCE III 400 spectrometer, a Bruker AVANCE DMX 500 spectrometer, or an Agilent DD2-600 spectrometer at ambient temperature. MALDI-TOF mass spectra were obtained on a Bruker UltrafleXtreme instrument. High performance liquid chromatography (HPLC) was operated on a reversed-phase column with Waters2695. Single crystal X-ray diffraction (SCXRD) was performed on a Bruker D8 VENTURECMOS X-ray diffractometer with graphite monochromatic Mo-K $\alpha$  radiation ( $\lambda = 0.71073 \text{ \AA}$ ). Melting points were obtained with a SGW X-4 INESA instrument. UV-Vis spectra were recorded on a UV-2600 spectrometer (Shimadzu Corporation, Japan) at 20 °C in a 1 cm quartz cell. Fluorescence emission spectra were collected on a RF-5301 spectrofluorophotometer, a RF-6000 spectrofluorophotometer (Shimadzu Corporation, Japan) or an Edinburgh FS1000 spectrofluorometer. Absolute fluorescence quantum yields were measured on an Edinburgh FS1000 spectrofluorometer.

## 2. Synthesis of cagearenes.

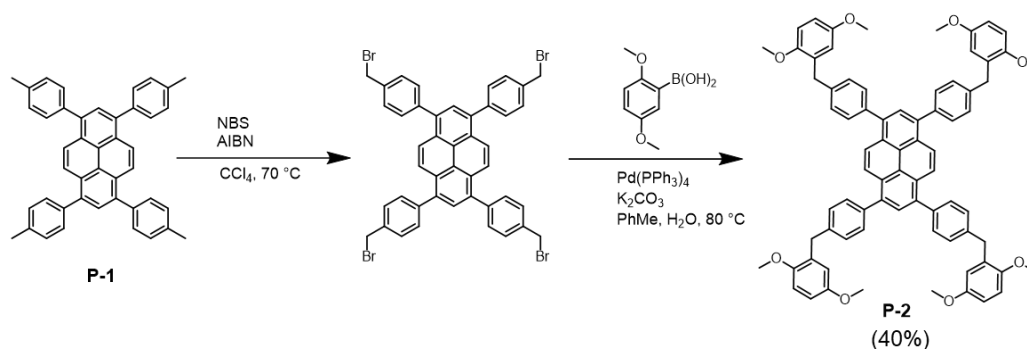

**Scheme S1** Synthetic route to **P-2**.

**P-1** (562 mg, 1.00 mmol) was added into a round bottom flask, followed by the addition of *n*-bromosuccinimide (NBS) (783 mg, 4.40 mmol), 2,2'-azobis(2-methylpropionitrile) (AIBN) (66 mg, 0.40 mmol) and carbon tetrachloride (CCl<sub>4</sub>, 15 mL). After being degassed through evacuation and nitrogen purging, the mixture was reacted at 70 °C overnight. The reaction mixture was then evaporated, extracted with DCM and washed with water. After the solvent was removed, the crude product was recrystallized in ethyl acetate/petroleum ether to obtain yellow powder. Next, the obtained powder, 2,5-dimethoxyphenylboronic acid (1201 mg, 6.60 mmol), K<sub>2</sub>CO<sub>3</sub> (607 mg, 4.40 mmol) and Pd(PPh<sub>3</sub>)<sub>4</sub> (204 mg, 0.18 mmol) were combined in a flask, and then toluene (90 mL) and distilled water (H<sub>2</sub>O, 18 mL) were added. The flask was degassed by evacuation and purging with nitrogen for three times. The reaction was stirred overnight at 80 °C under nitrogen atmosphere and then quenched with water. The organic layer was washed with water, and then dried with anhydrous Na<sub>2</sub>SO<sub>4</sub>. After the solvent was evaporated, the crude product was purified by column chromatography (dichloromethane/petroleum ether, 1:2 v/v) and recrystallized to obtain **P-2** as pale yellow powder (443 mg, 40%). <sup>1</sup>H NMR (600 MHz, CDCl<sub>3</sub>, 298 K) δ (ppm): 8.15 (s, 4H), 7.96 (s, 2H), 7.55 (d, *J* = 8.1 Hz, 8H), 7.36 (d, *J* = 8.0 Hz, 8H), 6.84 (d, *J* = 8.8 Hz, 4H), 6.79–6.74 (m, 8H), 4.06 (s, 8H), 3.82 (s, 12H), 3.76 (s, 12H). <sup>13</sup>C NMR (100 MHz, CDCl<sub>3</sub>, 298 K) δ (ppm): 153.80, 151.96, 140.02, 138.86, 137.24, 131.07, 130.75, 129.72, 129.02, 128.18, 126.19, 125.38, 117.12, 111.77, 111.61, 56.30, 55.86, 35.98. MALDI-TOF MS (Figure S7): *m/z* calcd. for C<sub>76</sub>H<sub>66</sub>O<sub>8</sub>H<sup>+</sup> [M+H]<sup>+</sup> 1107.483, found 1107.483, error 0 ppm. Melting point: 123.0–123.9 °C.

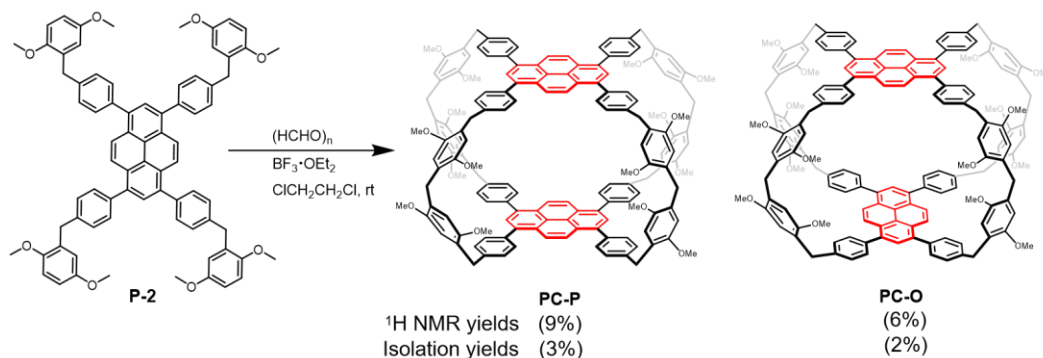

**Scheme S2** Synthetic route to **PC-P** and **PC-O**.

**P-2** (1107 mg, 1.00 mmol), paraformaldehyde (240 mg, 8.00 mmol) and anhydrous dichloroethane (DCE) (625 mL) were mixed in a flask under the nitrogen protection. Then boron trifluoride diethyl etherate (0.5 mL) was added. The reaction was detected by thin-layer chromatography, and water was added when the reactants disappeared. The organic layer was washed with water and dried over anhydrous Na<sub>2</sub>SO<sub>4</sub>. After concentrating the filtrate through reduced pressure distillation, the crude product was purified by column chromatography (aluminum oxide, dichloromethane/petroleum ether = 1:1) and recrystallized to obtain the product, **PC-P** (30.3 mg, 3%) and **PC-O** (20.4 mg, 2%).

**PC-P:** <sup>1</sup>H NMR (500 MHz, CDCl<sub>3</sub>, 298 K)  $\delta$  (ppm): 7.91 (s, 8H), 7.72 (s, 4H), 7.37–7.22 (m, 32H), 7.03 (s, 8H), 6.72 (s, 8H), 3.99 (s, 16H), 3.92 (s, 8H), 3.84 (s, 24H), 3.79 (s, 24H). <sup>13</sup>C NMR (125 MHz, CDCl<sub>3</sub>, 298 K)  $\delta$  (ppm): 151.43, 151.19, 140.60, 138.58, 136.79, 130.56, 129.54, 128.80, 128.57, 127.77, 127.45, 125.81, 125.00, 114.83, 113.65, 56.25, 56.15, 36.10, 30.29. MALDI-TOF MS (Figure S11):  $m/z$  calcd for C<sub>156</sub>H<sub>132</sub>O<sub>16</sub>H<sup>+</sup> [M+H]<sup>+</sup>, 2261.959; found 2261.970, error 5 ppm. The solid powder of **PC-P** remains stable and does not melt at 315 °C. However, it begins to deteriorate once the temperature surpasses this threshold.

**PC-O:** <sup>1</sup>H NMR (400 MHz, CDCl<sub>3</sub>, 298 K)  $\delta$  (ppm): 7.92 (s, 8H), 7.74 (s, 4H), 7.34 (d,  $J$  = 7.8 Hz, 18H), 7.22 (s, 14H), 6.97 (s, 8H), 6.72 (s, 8H), 4.09 (s, 3H), 4.05 (s, 5H), 3.97 (s, 5H), 3.93 (s, 11H), 3.81 (s, 24H), 3.75 (s, 24H). <sup>13</sup>C NMR (100 MHz, CDCl<sub>3</sub>, 298 K)  $\delta$  (ppm): 151.60, 151.47, 140.56, 138.65, 136.88, 130.56, 128.90, 128.44, 127.82, 127.29, 125.91, 125.01, 114.83, 114.04, 56.30, 35.99, 29.86. MALDI-TOF MS (Figure S15):  $m/z$  calcd for

$C_{156}H_{132}O_{16}H^+ [M+H]^+$ , 2261.959; found 2261.961, error 1 ppm. The solid powder of **PC-O** remains stable and does not melt at 315 °C. However, it begins to deteriorate once the temperature surpasses this threshold.

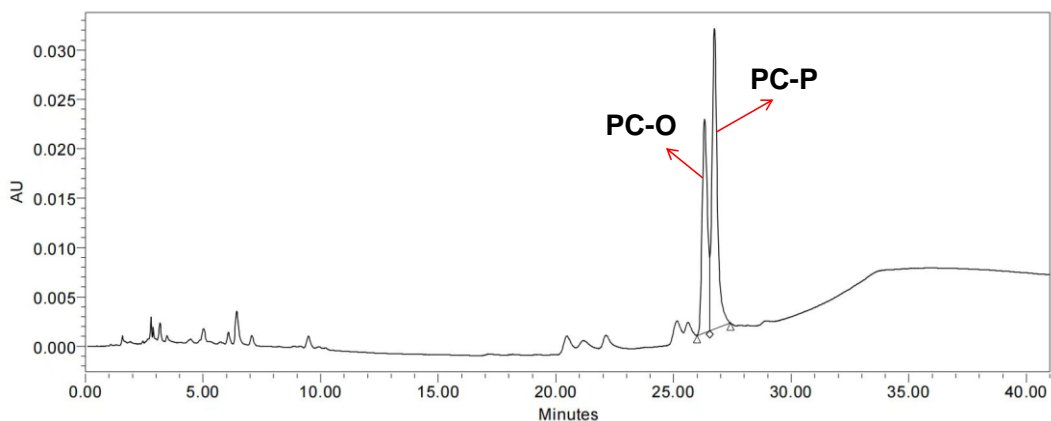

**Fig. S1** HPLC spectrum of **PC-P** and **PC-O**.

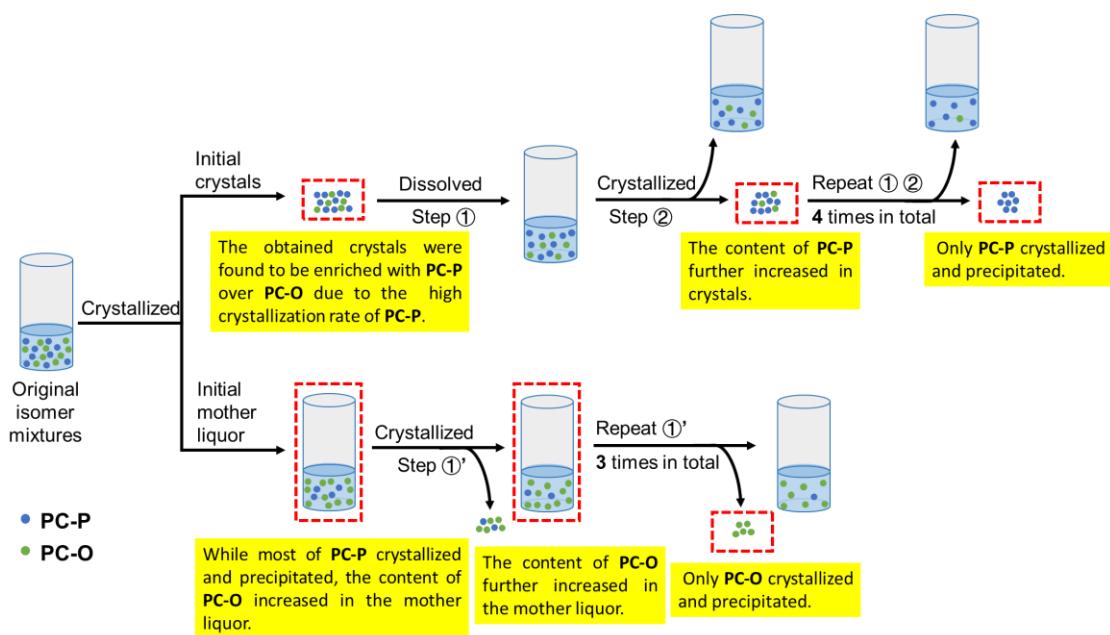

**Fig. S2** The designed process for separating **PC-P** and **PC-O**.

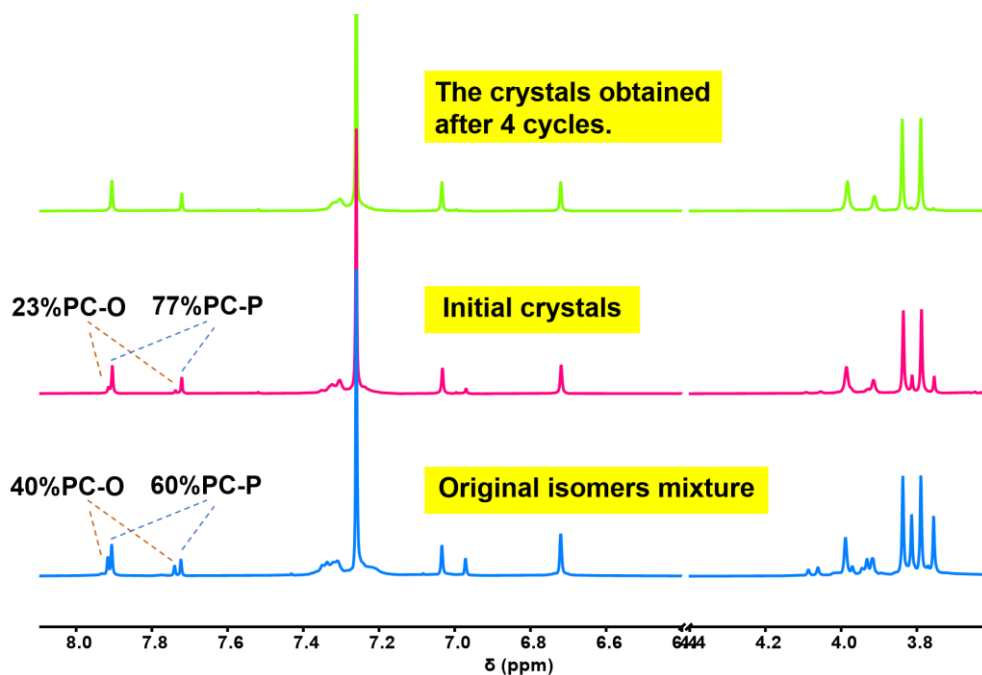

**Fig. S3** The changes of  $^1\text{H}$  NMR spectra (400 MHz,  $\text{CDCl}_3$ , 298 K) in the process of purifying **PC-P**. After the first crystallization purification, the content of **PC-P** within the obtained crystals increased significantly. After the fourth crystallization purification, pure **PC-P** was obtained.

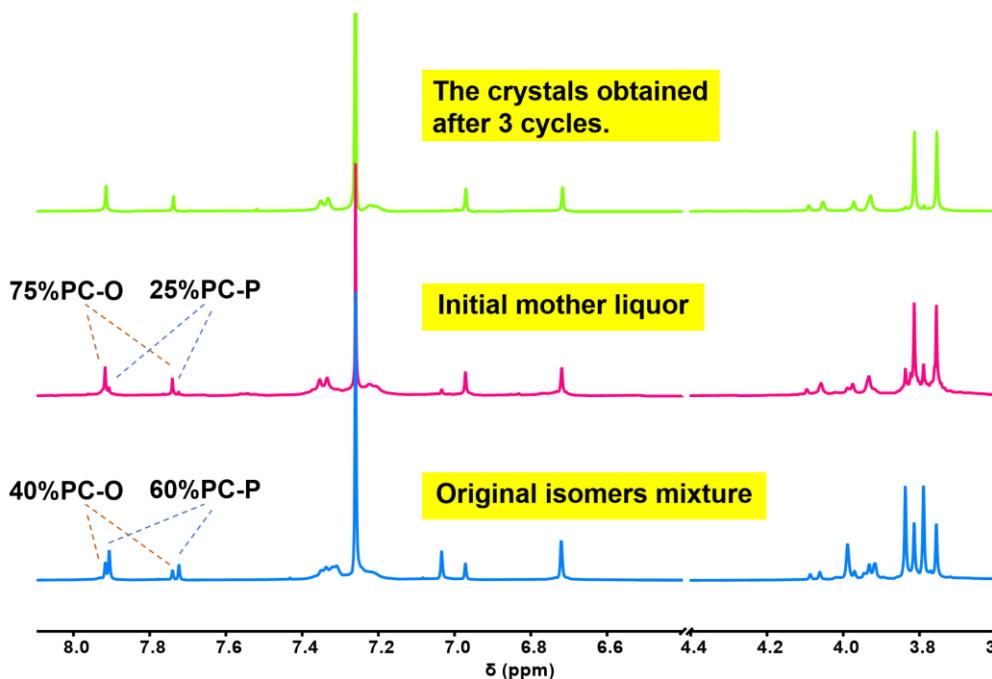

**Fig. S4** The changes of  $^1\text{H}$  NMR spectra (400 MHz,  $\text{CDCl}_3$ , 298 K) in the process of purifying **PC-O**. After the first crystallization purification, the content of **PC-O** in the mother liquor increased significantly. After the third crystallization purifications, pure **PC-O** was obtained.

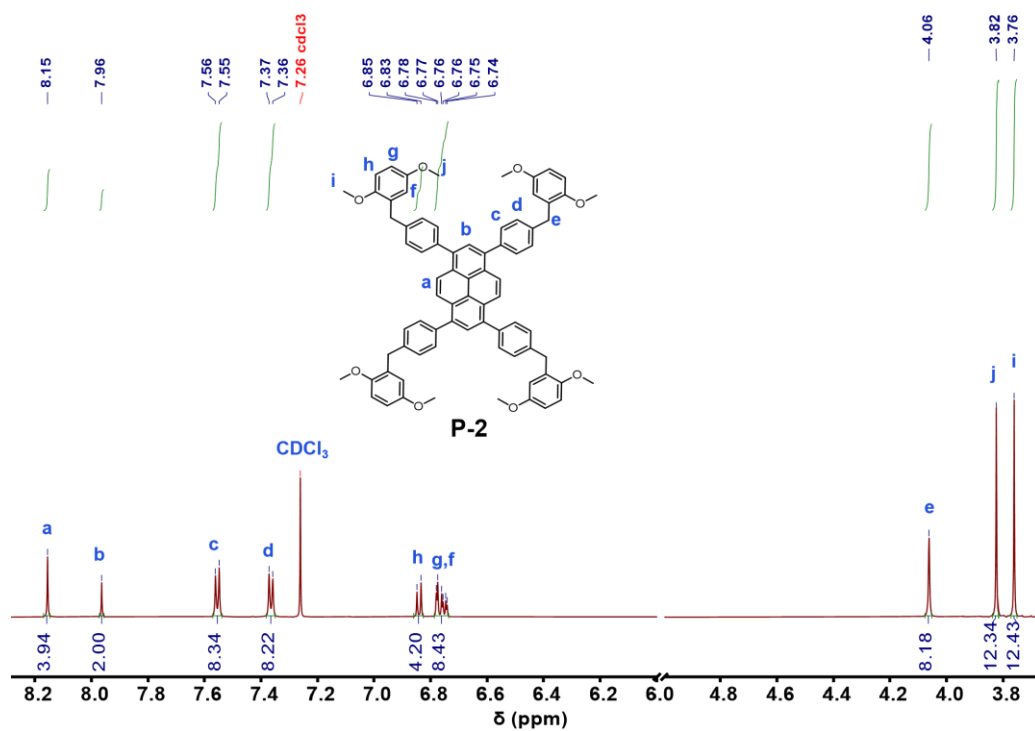

Fig. S5 <sup>1</sup>H NMR spectrum (600 MHz, CDCl<sub>3</sub>, 298 K) of P-2.

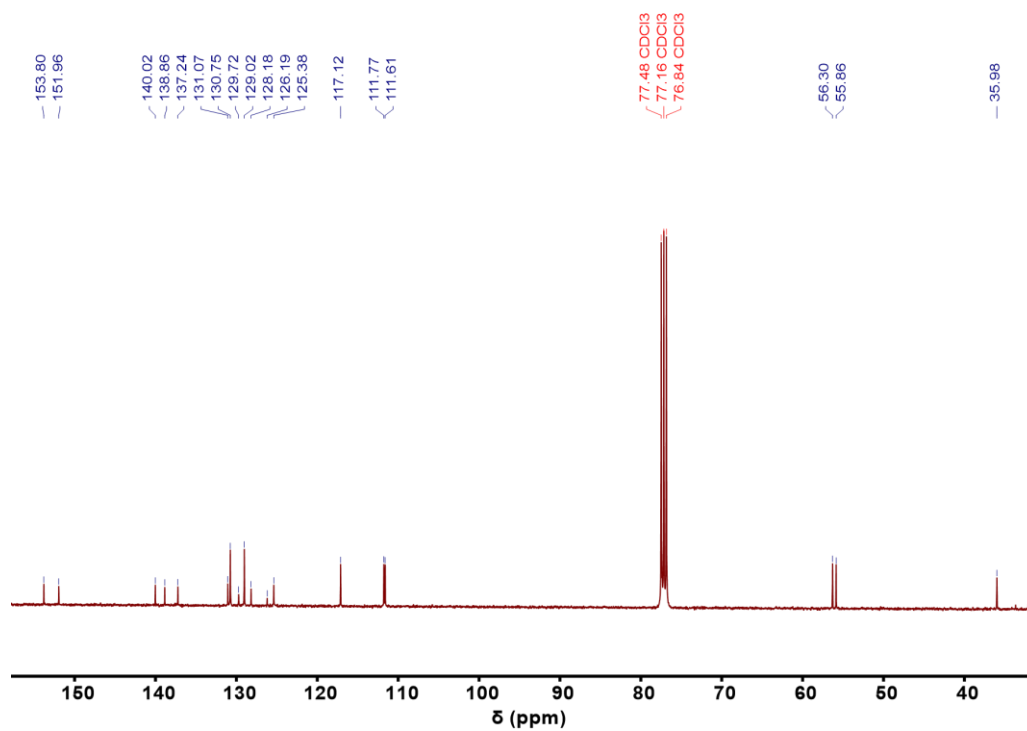

Fig. S6 <sup>13</sup>C NMR spectrum (100 MHz, CDCl<sub>3</sub>, 298 K) of P-2.

### MALDI-TOF Mass Spectrum

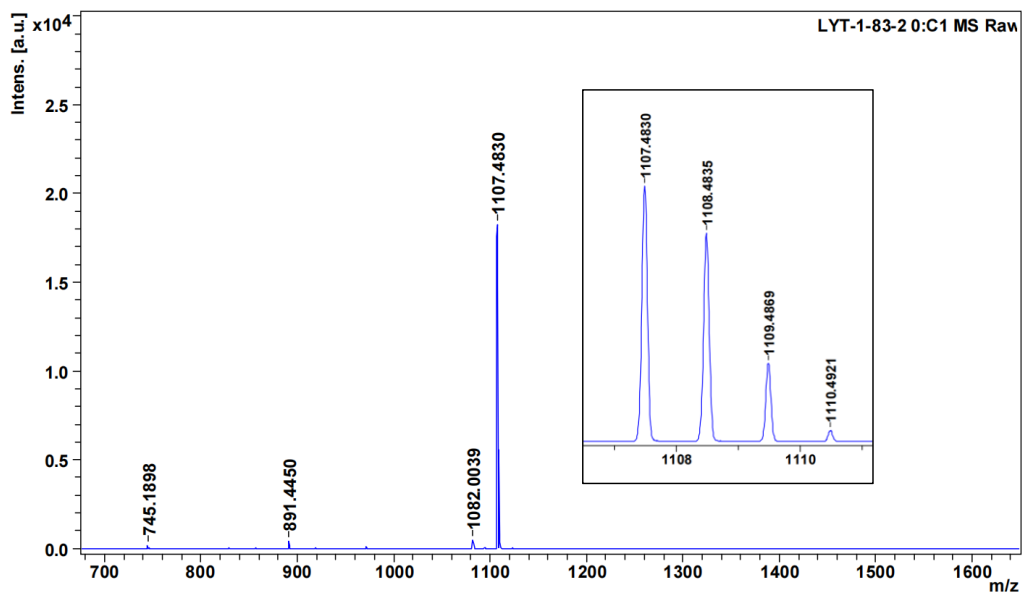

Fig. S7 MALDI-TOF MS spectrum of P-2.

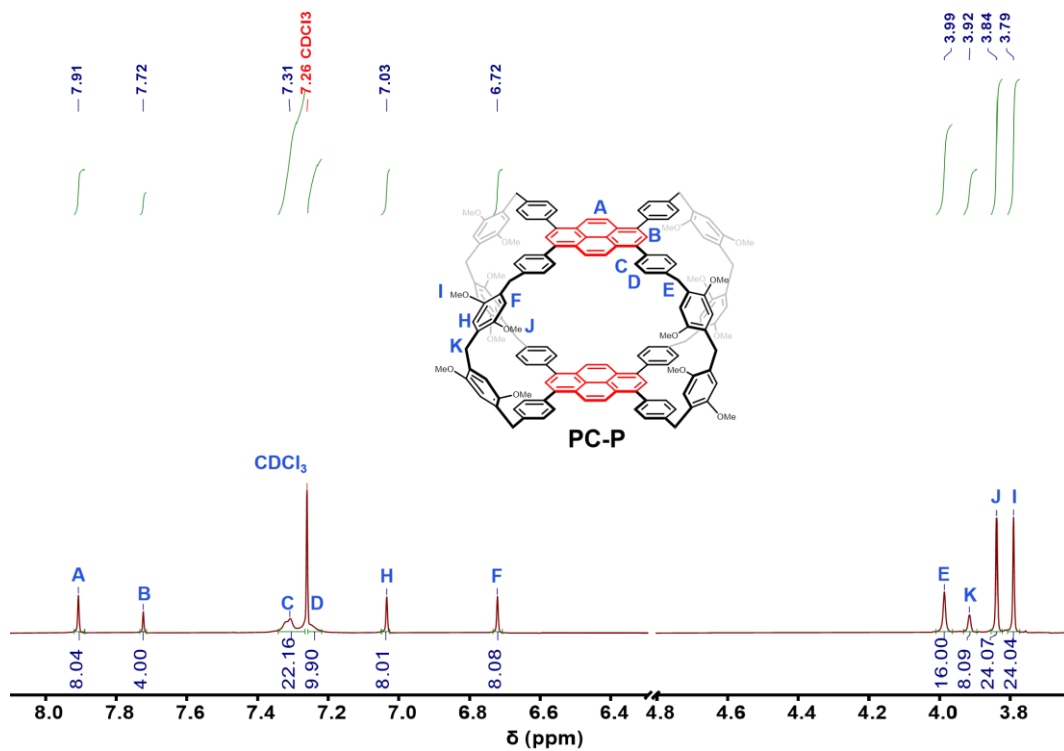

Fig. S8 Partial <sup>1</sup>H NMR spectrum (500 MHz, CDCl<sub>3</sub>, 298 K) of PC-P.



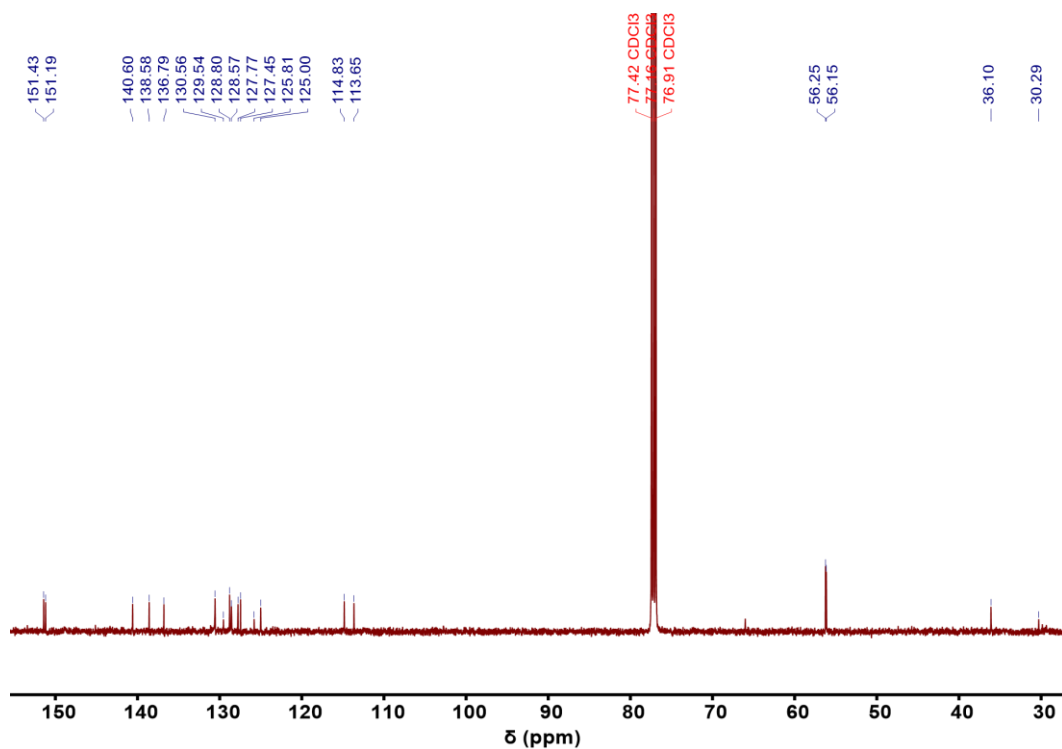

Fig. S9  $^{13}\text{C}$  NMR spectrum (125 MHz,  $\text{CDCl}_3$ , 298 K) of PC-P.

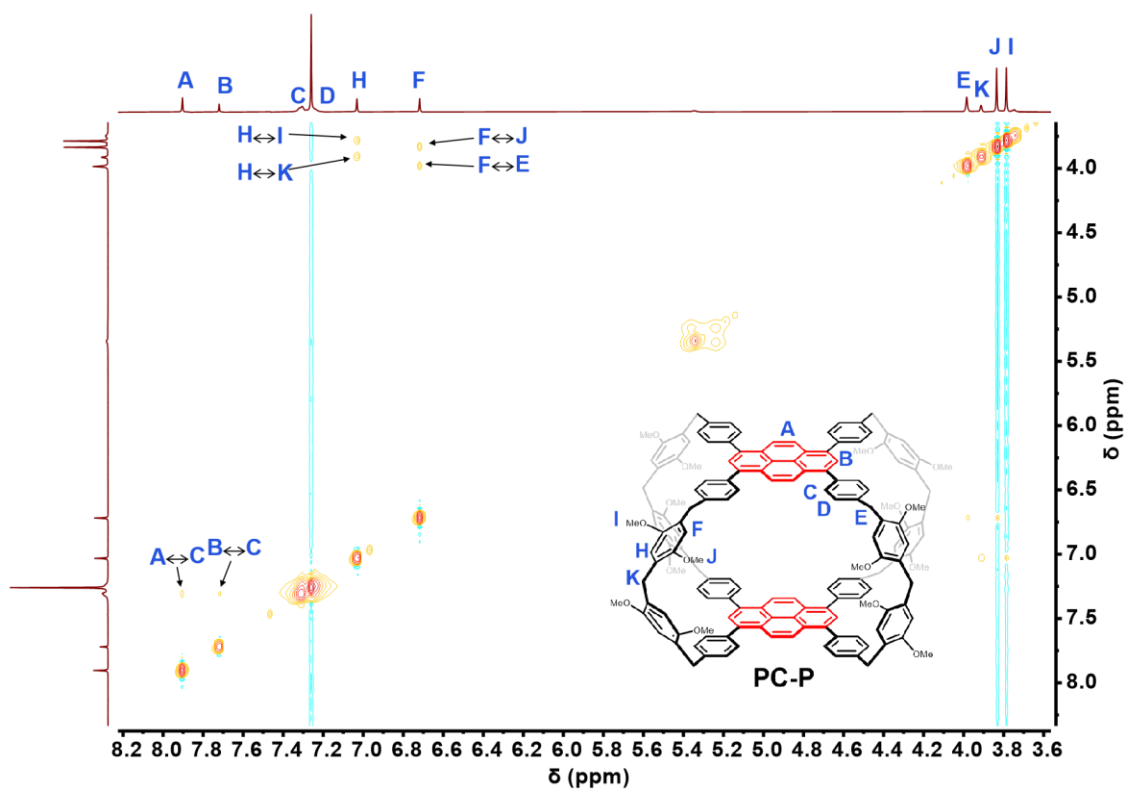

Fig. S10 Partial 2D  $^1\text{H}$ - $^1\text{H}$  NOESY spectrum (500 MHz,  $\text{CDCl}_3$ , 298 K) of PC-P.

### MALDI-TOF Mass Spectrum

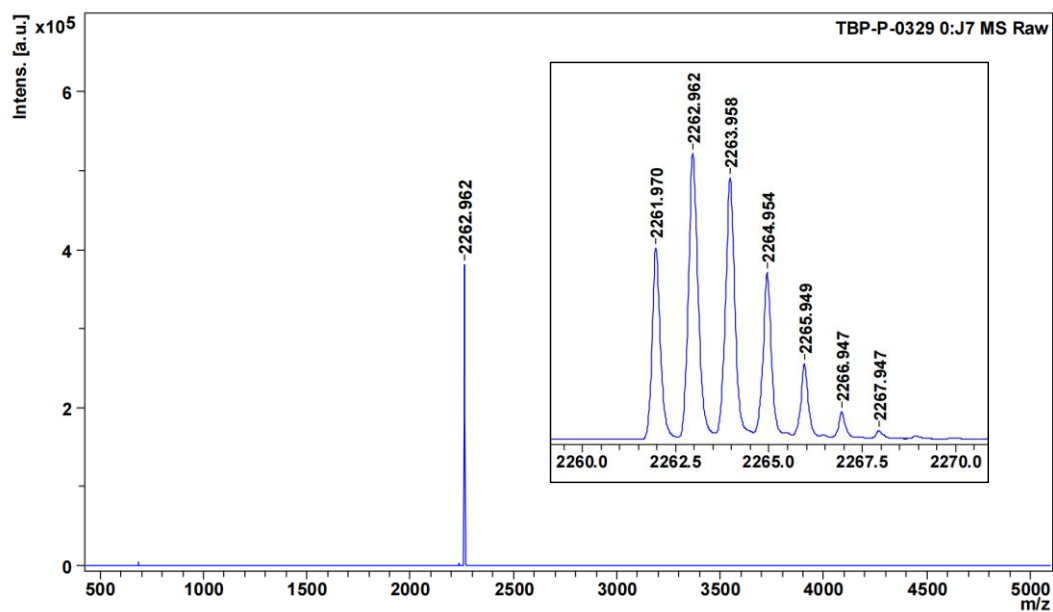

Fig. S11 MALDI-TOF MS spectrum of PC-P.

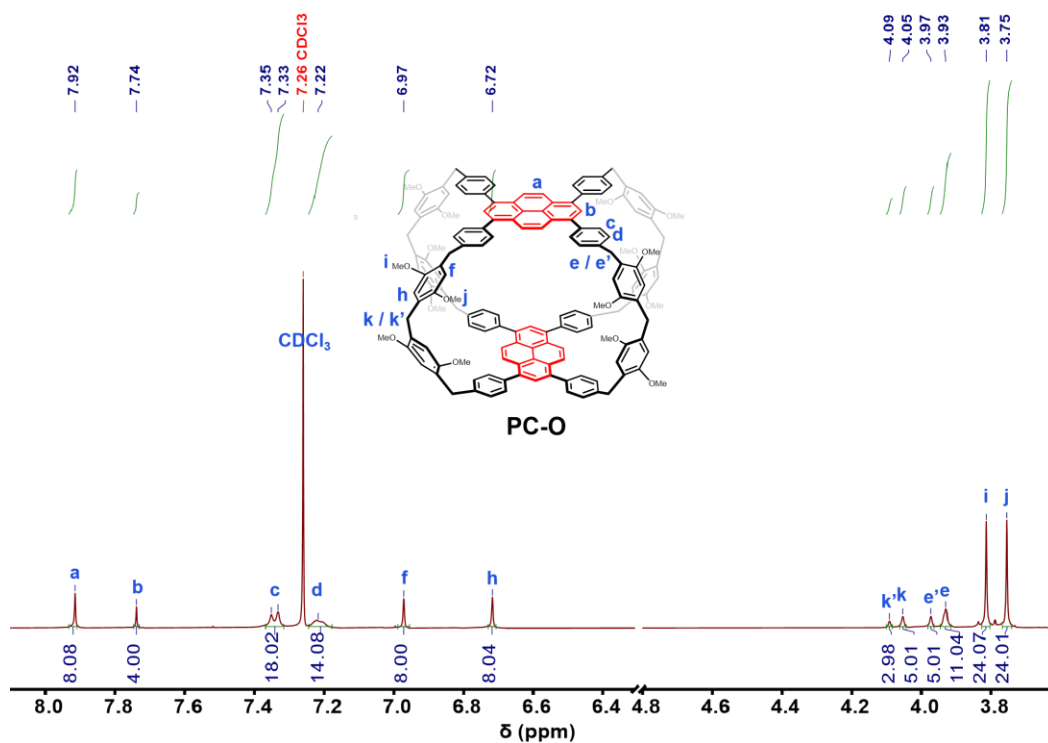

Fig. S12 Partial <sup>1</sup>H NMR spectrum (400 MHz, CDCl<sub>3</sub>, 298 K) of PC-O.

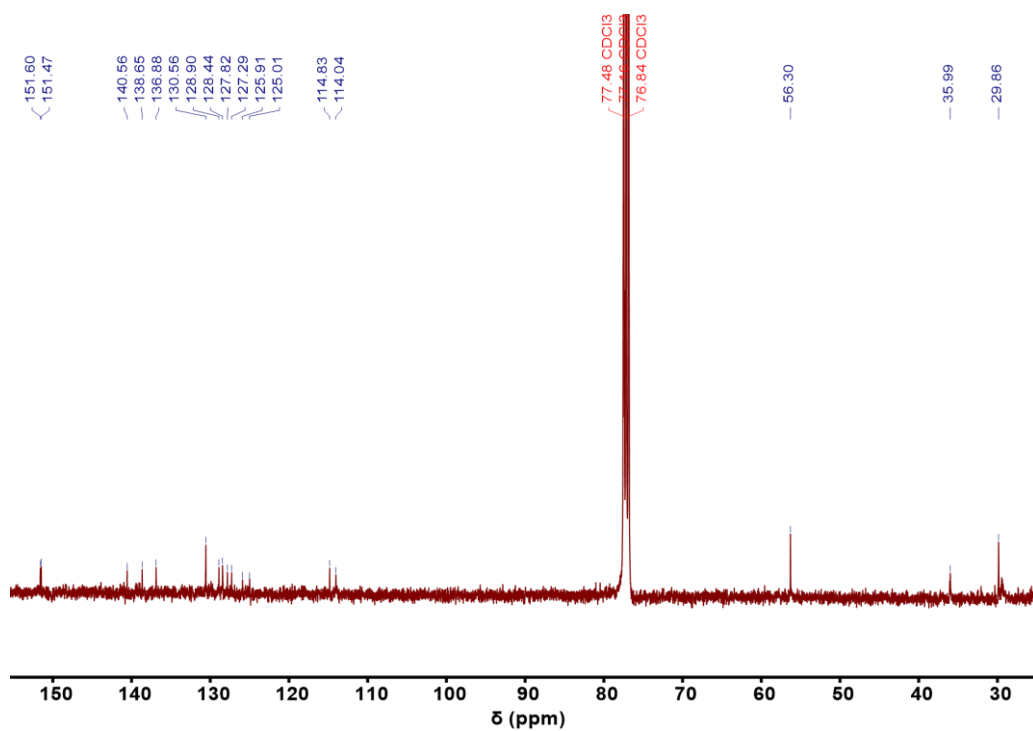

Fig. S13 The  $^{13}\text{C}$  NMR spectrum (100 MHz,  $\text{CDCl}_3$ , 298 K) of PC-O.

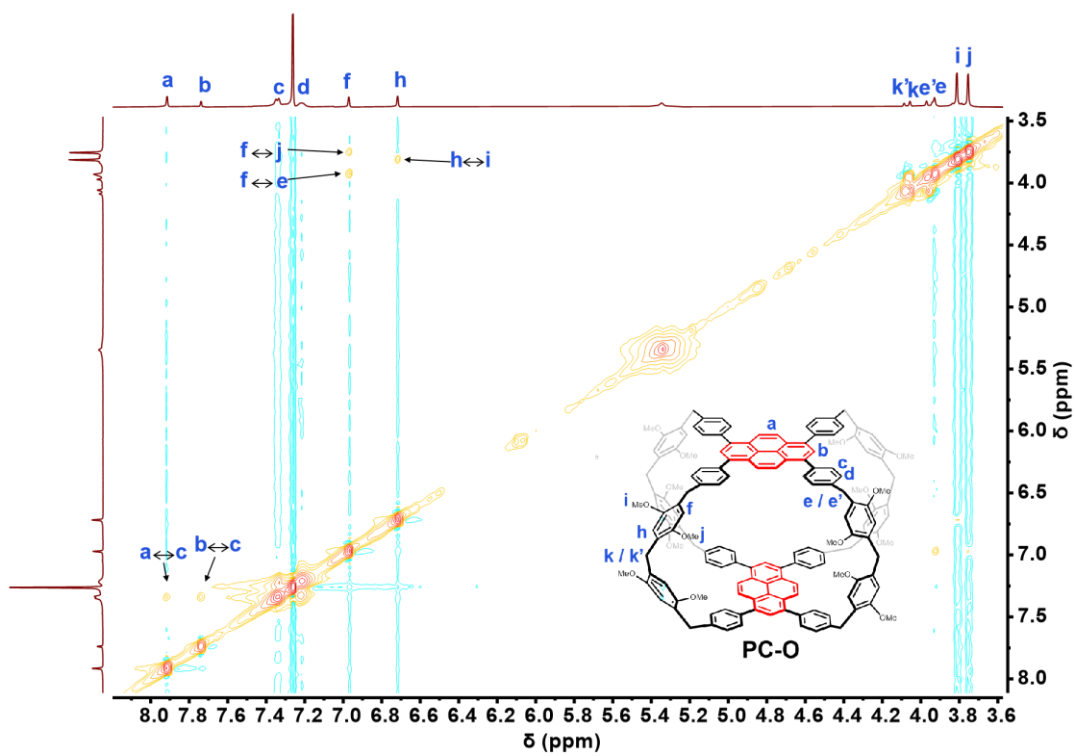

Fig. S14 Partial 2D  $^1\text{H}$ - $^1\text{H}$  NOESY spectrum (500 MHz,  $\text{CDCl}_3$ , 298 K) of PC-O.

### MALDI-TOF Mass Spectrum

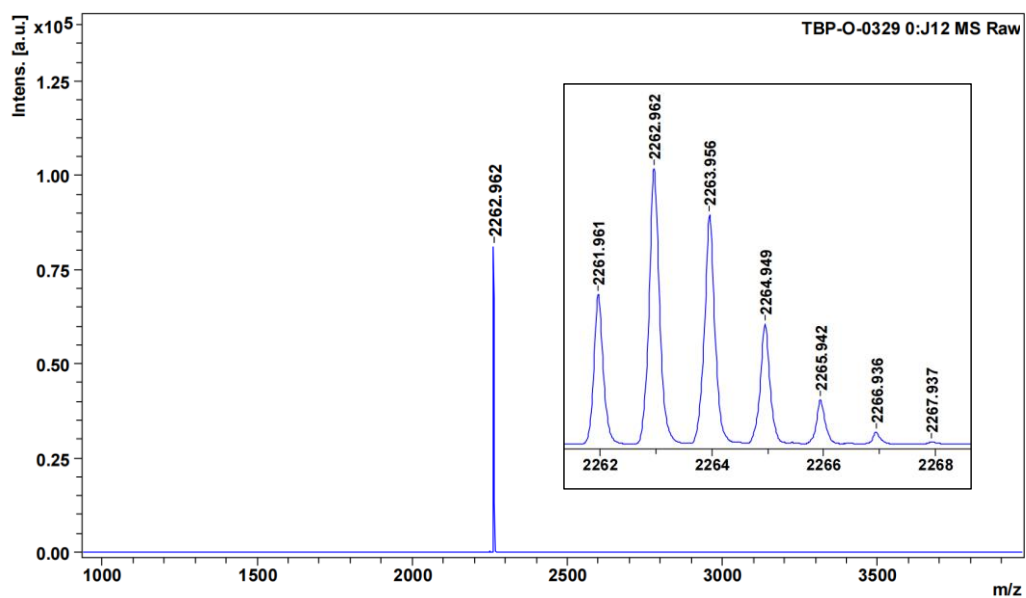

Fig. S15 MALDI-TOF MS spectrum of PC-O.

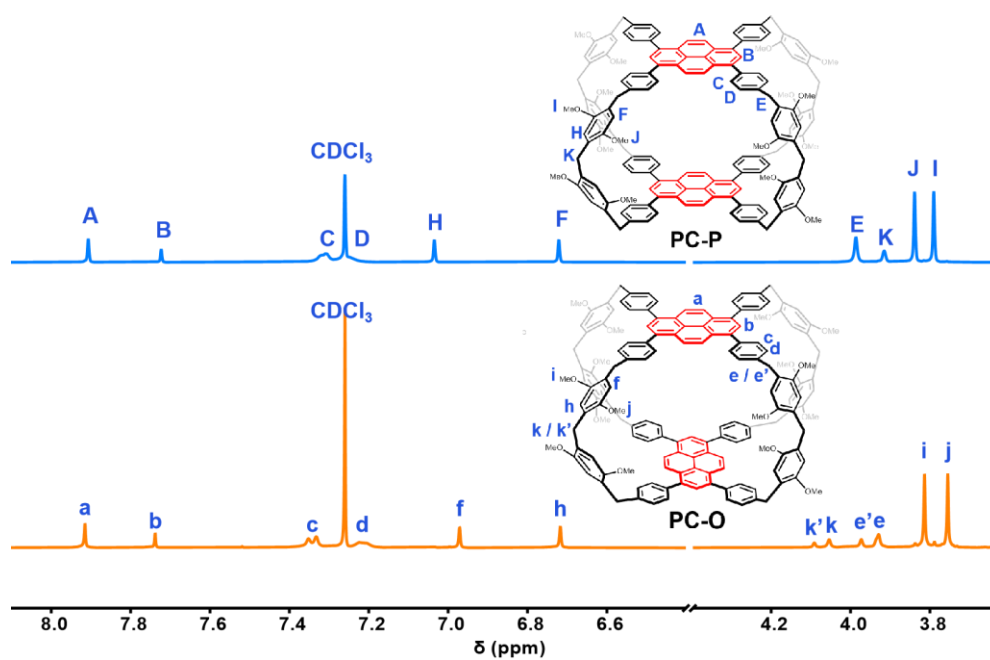

Fig. S16 The assigned <sup>1</sup>H NMR spectra of the signals for PC-P and PC-O.

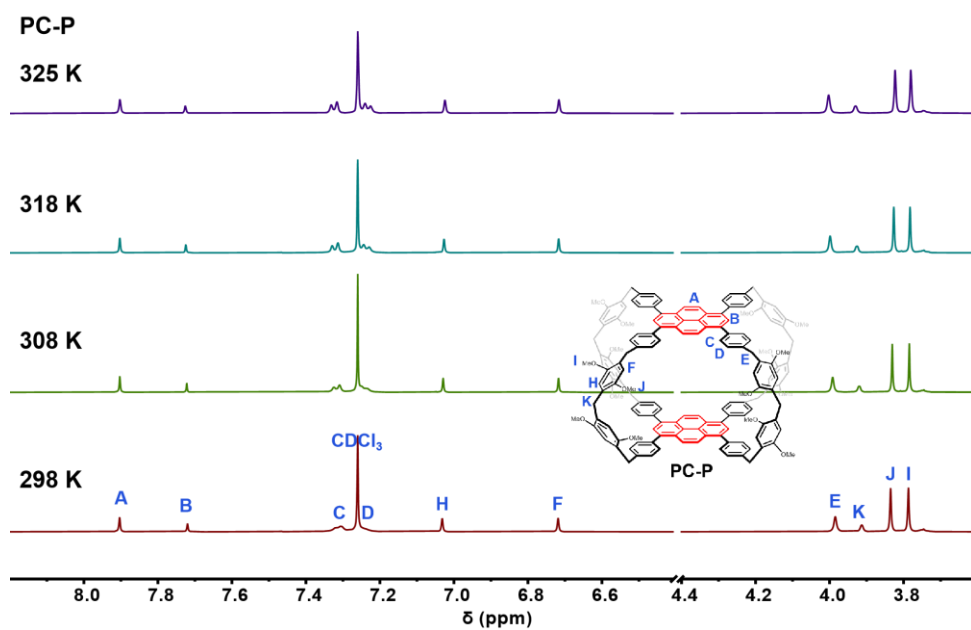

Fig. S17 Partial <sup>1</sup>H VT-NMR spectrum (500 MHz, CDCl<sub>3</sub>) of PC-P.

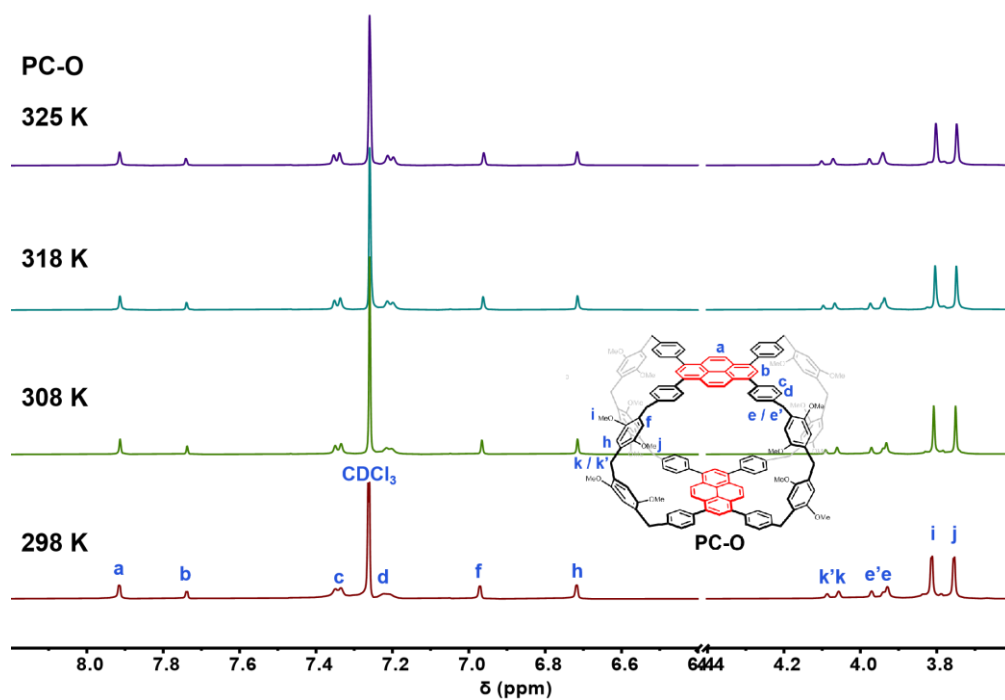

Fig. S18 Partial <sup>1</sup>H VT-NMR spectrum (500 MHz, CDCl<sub>3</sub>) of PC-O.

### 3. X-ray single crystal diffraction data of PC-P

Single crystals were obtained by slow diffusion of isopropyl ether into a toluene solution of PC-P. CCDC: 2337817.

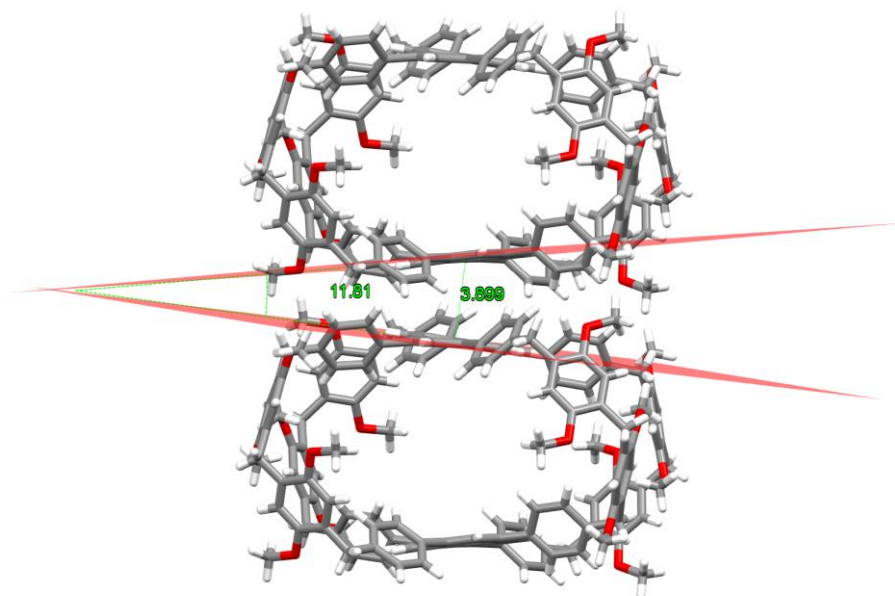

**Fig. S19** Illustration of  $\pi$ - $\pi$  stacking interaction between two PC-P molecules. The dihedral angle is 11.81°. Solvent molecules were omitted for clarity. Atoms color code: O (red), C (gray), H (white).

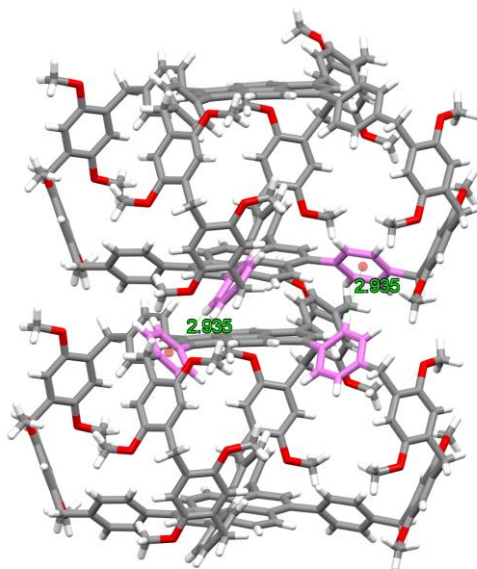

**Fig. S20** Illustration of C-H $\cdots$  $\pi$  interactions between two PC-P molecules. Solvent molecules were omitted for clarity. Atoms color code: O (red), C (gray and purple), H (white).

**Table S1.** Experimental crystallographic data for the crystal of **PC-P**.

| Identification code                                          | <b>PC-P</b>                                                                   |
|--------------------------------------------------------------|-------------------------------------------------------------------------------|
| Empirical Formula                                            | C <sub>170</sub> H <sub>148</sub> O <sub>16</sub>                             |
| Formula weight                                               | 2446.88                                                                       |
| Temperature (K)                                              | 213.00                                                                        |
| Crystal system                                               | orthorhombic                                                                  |
| Space group                                                  | <i>Pbcn</i>                                                                   |
| <i>a</i> (Å)                                                 | 12.832(2)                                                                     |
| <i>b</i> (Å)                                                 | 38.948(7)                                                                     |
| <i>c</i> (Å)                                                 | 37.835(6)                                                                     |
| $\alpha$ (°)                                                 | 90                                                                            |
| $\beta$ (°)                                                  | 90                                                                            |
| $\gamma$ (°)                                                 | 90                                                                            |
| Volume (Å <sup>3</sup> )                                     | 18910(6)                                                                      |
| <i>Z</i>                                                     | 4                                                                             |
| $\rho_{\text{calc}}$ (g/cm <sup>3</sup> )                    | 0.859                                                                         |
| $\mu$ (mm <sup>-1</sup> )                                    | 0.273                                                                         |
| <i>F</i> (000)                                               | 5184.0                                                                        |
| Crystal size (mm <sup>3</sup> )                              | 0.07 × 0.07 × 0.05                                                            |
| Radiation                                                    | GaK $\alpha$ ( $\lambda$ = 1.34139)                                           |
| 2 $\theta$ range for data collection (°)                     | 6.31 to 110.266                                                               |
| Index ranges                                                 | -9 ≤ <i>h</i> ≤ 15, -47 ≤ <i>k</i> ≤ 39, -31 ≤ <i>l</i> ≤ 46                  |
| Reflections collected                                        | 77365                                                                         |
| Independent reflections                                      | 17862 [ <i>R</i> <sub>int</sub> = 0.1482, <i>R</i> <sub>sigma</sub> = 0.1500] |
| Data/restraints/parameters                                   | 17862/36/835                                                                  |
| Goodness-of-fit on <i>F</i> <sup>2</sup>                     | 1.024                                                                         |
| Final <i>R</i> indexes [ <i>I</i> ≥ 2 $\sigma$ ( <i>I</i> )] | <i>R</i> <sub>1</sub> = 0.1192, <i>wR</i> <sub>2</sub> = 0.3430               |
| Final <i>R</i> indexes [all data]                            | <i>R</i> <sub>1</sub> = 0.2319, <i>wR</i> <sub>2</sub> = 0.4197               |
| Largest diff. peak/hole (e Å <sup>-3</sup> )                 | 0.32/-0.30                                                                    |

#### 4. UV-Vis absorption spectra and quantum yield calculations

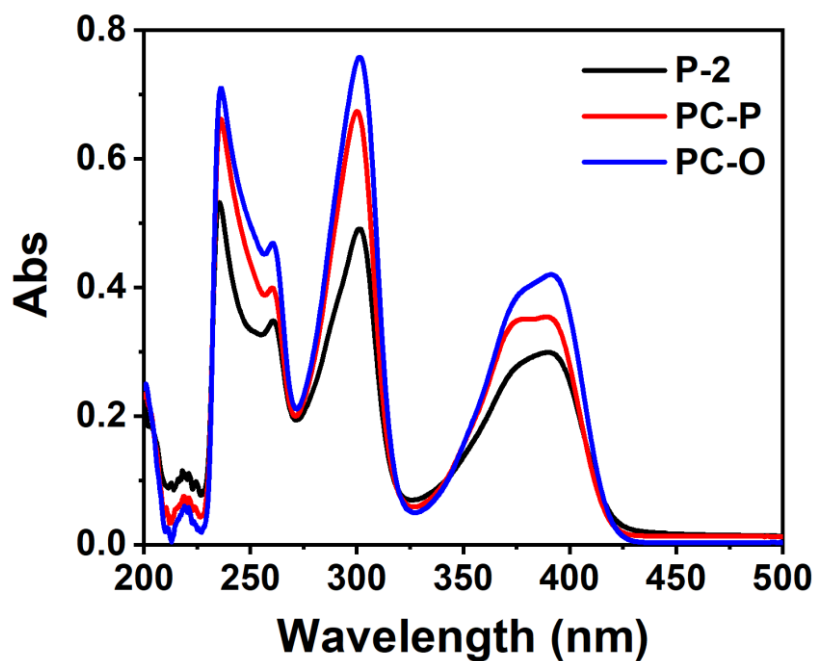

**Fig. S21** UV-Vis spectra of **P-2**, **PC-P** and **PC-O** in tetrahydrofuran ( $5.00 \times 10^{-6}$  M).

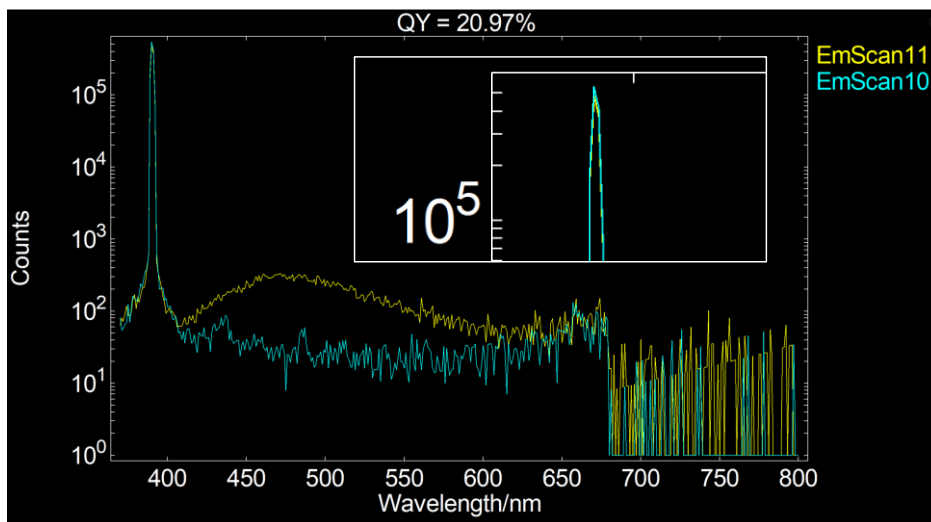

**Fig. S22** Quantum yield spectrum of **P-2** in the solid state (EmScan11: **P-2**, EmScan10: blank control). Insets: photons net absorption of **P-2**.



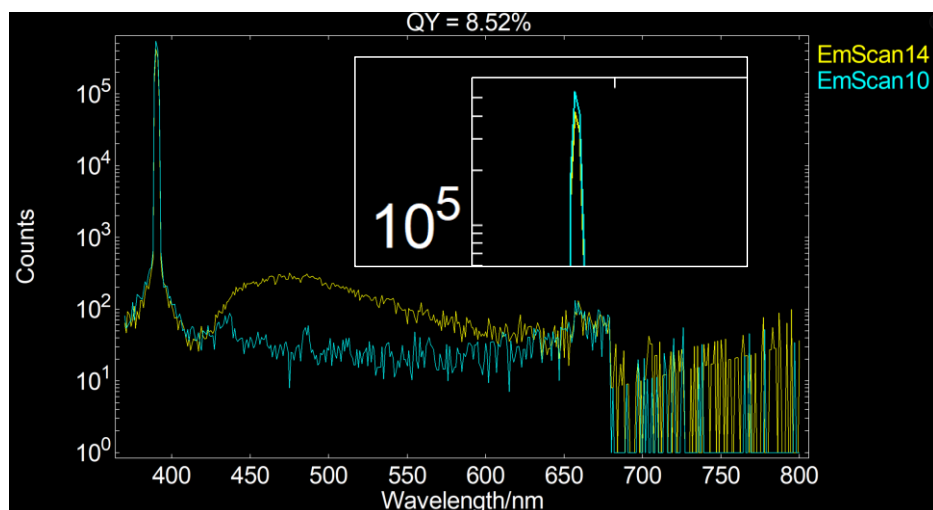

**Fig. S23** Quantum yield spectrum of **PC-P** in the solid state (EmScan14: **PC-P**, EmScan10: blank control). Insets: photons net absorption of **PC-P**.

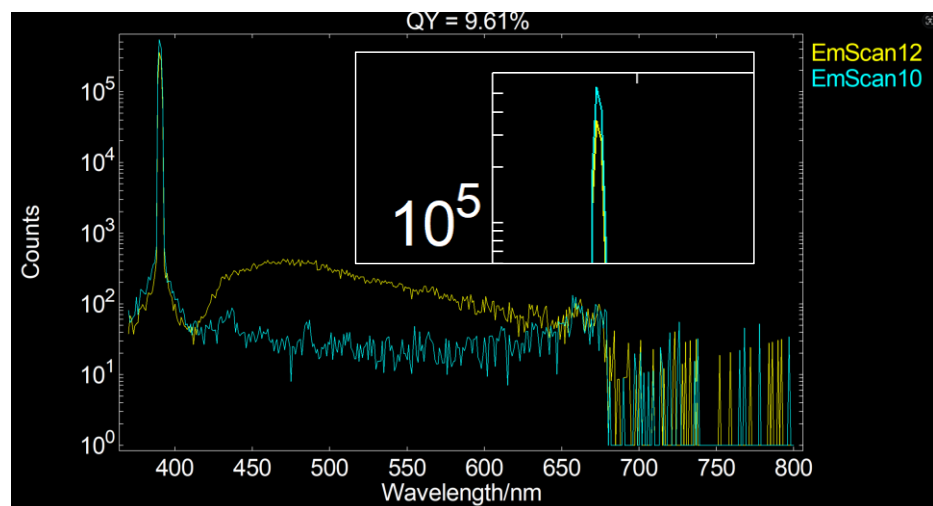

**Fig. S24** Quantum yield spectrum of **PC-O** in the solid state (EmScan12: **PC-O**, EmScan10: blank control). Insets: photons net absorption of **PC-O**.

### ***5. Investigation of host–guest complexation behavior in solution***

To investigate the host–guest complexation of electron-rich organic cages **PC-P** and **PC-O** with various electron-deficient guests, fluorescence titration experiments were conducted. The guests included 7,7,8,8-tetracyanoquinodimethane (**TCNQ**), tetrachloro-1,4-benzoquinone (**TCQ**), and 1,2,4,5-tetracyanobenzene (**TCB**).

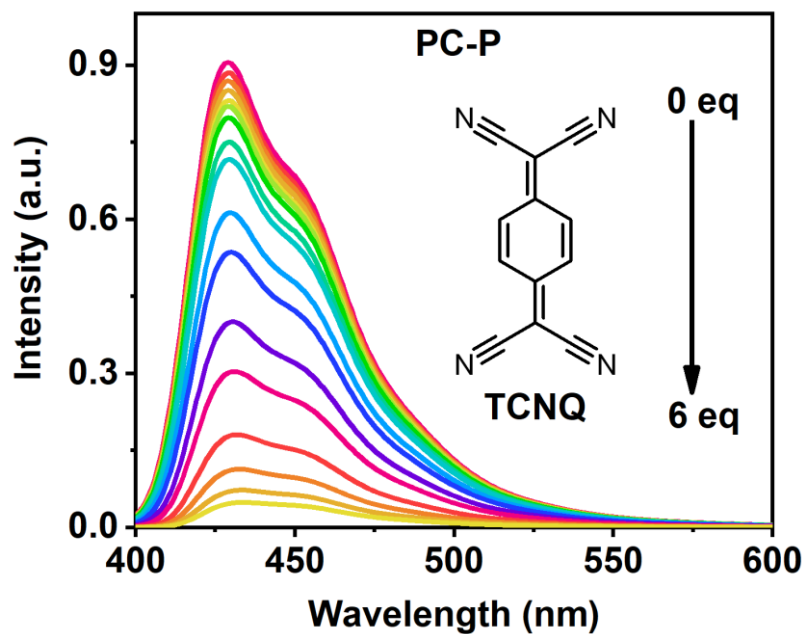

**Fig. S25** The fluorescence emission spectra of PC-P ( $1.00 \times 10^{-5}$  M, dichloromethane) in the presence of 0, 0.05, 0.10, 0.15, 0.20, 0.25, 0.30, 0.40, 0.50, 0.75, 1.0, 1.5, 2.0, 3.0, 4.0, 5.0, and 6.0 equiv. of TCNQ.

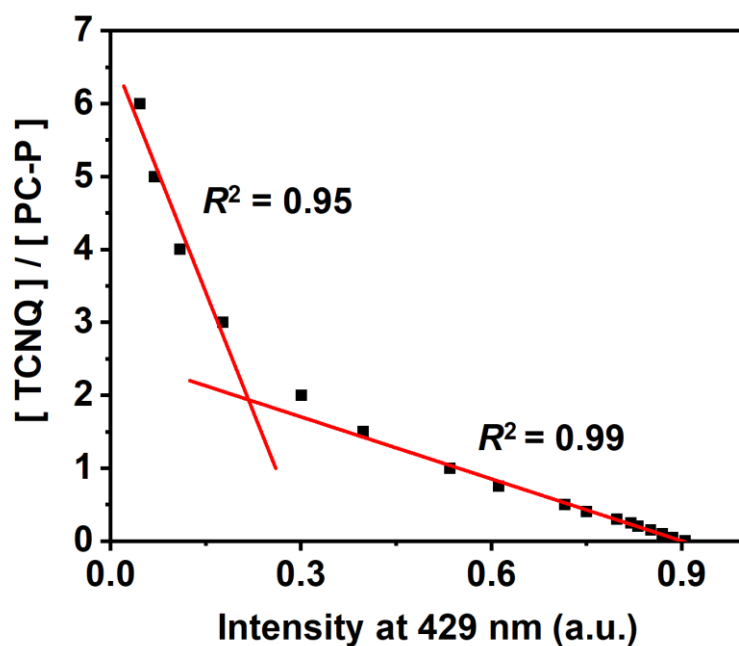

**Fig. S26** A molar ratio plot for PC-P and TCNQ, showing a 1:2 complexation stoichiometry.

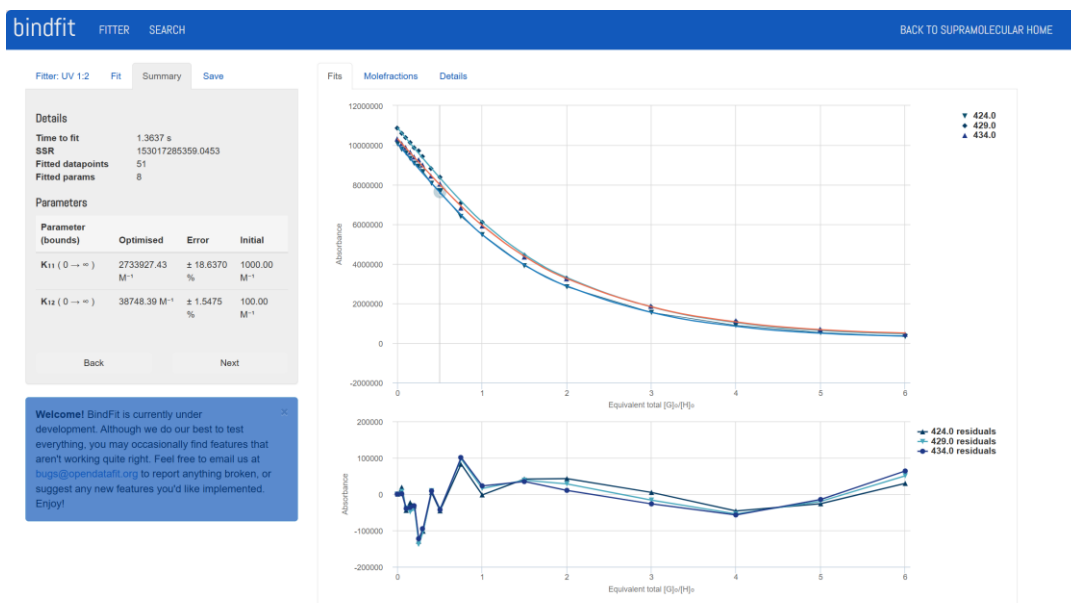

**Fig. S27** Non-linear curve-fitting graph of the complexation constants of **PC-P** and **TCNQ** using a 1:2 binding model by a non-linear curve-fitting method available at the website [www.supramolecular.org](http://www.supramolecular.org).

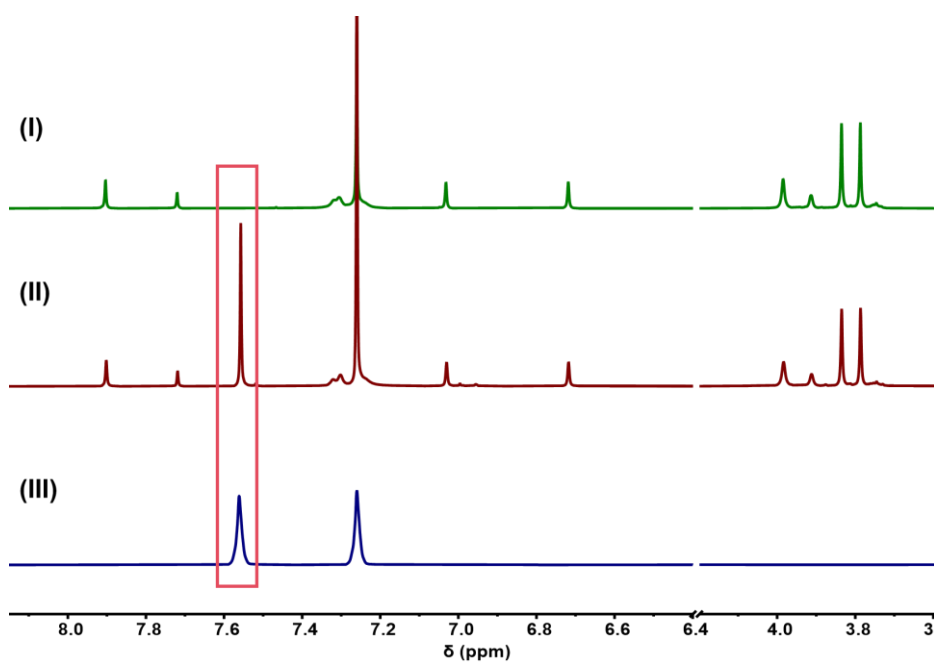

**Fig. S28** Partial <sup>1</sup>H NMR spectra (600 MHz, CDCl<sub>3</sub>, 298 K): (I) **PC-P**; (II) 0.88 mM **PC-P** and 8.8 mM **TCNQ**; (III) **TCNQ**.

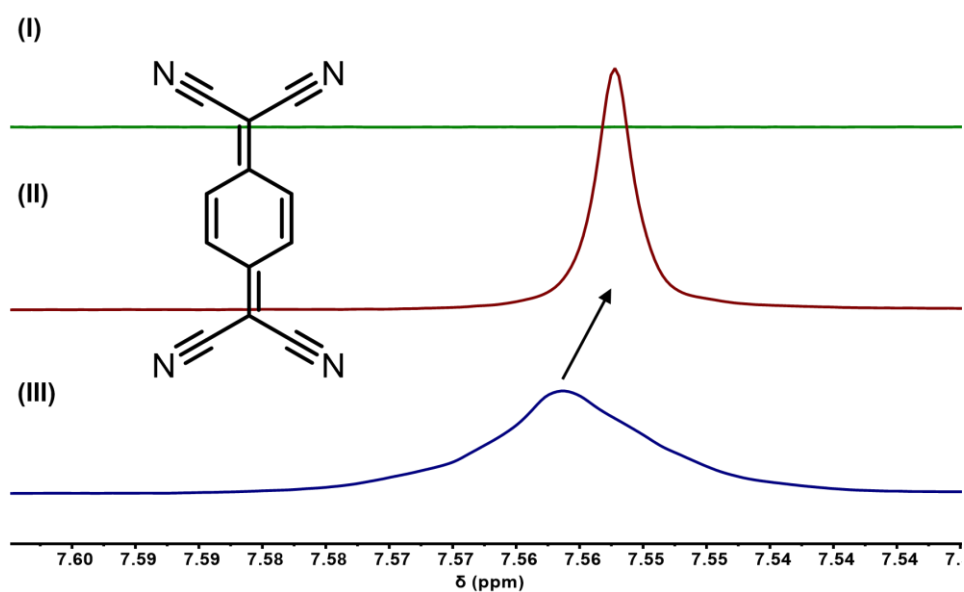

**Fig. S29** The marked region (from 7.60 ppm to 7.53 ppm) of Fig S28. The upfield shift of protons on TCNQ in the presence of PC-P suggested that the two guest molecules were in the inner space.

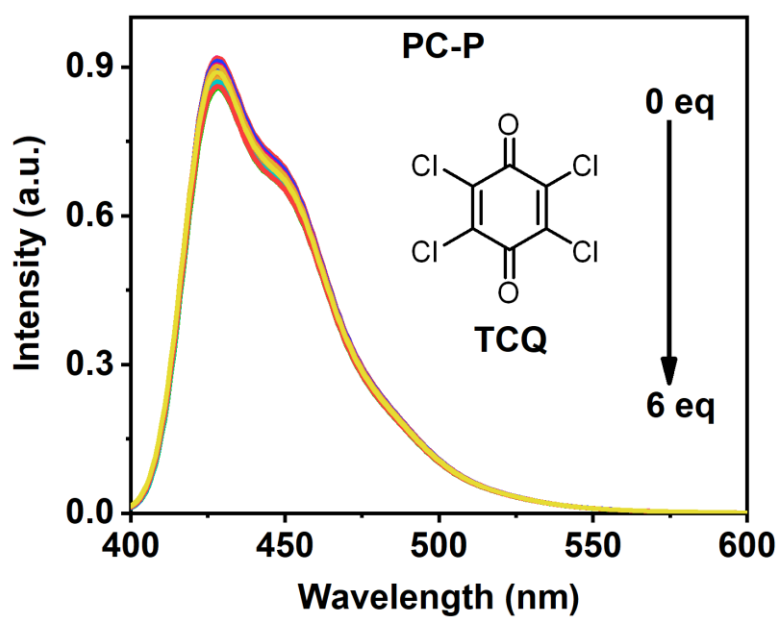

**Fig. S30** The fluorescence emission spectra of PC-P ( $1.00 \times 10^{-5}$  M, dichloromethane) in the presence of 0, 0.05, 0.10, 0.15, 0.20, 0.25, 0.30, 0.40, 0.50, 0.75, 1.0, 1.5, 2.0, 3.0, 4.0, 5.0, and 6.0 equiv. of TCQ. The curve underwent a non-significant change, which indicates that almost no complexation took place in this system.

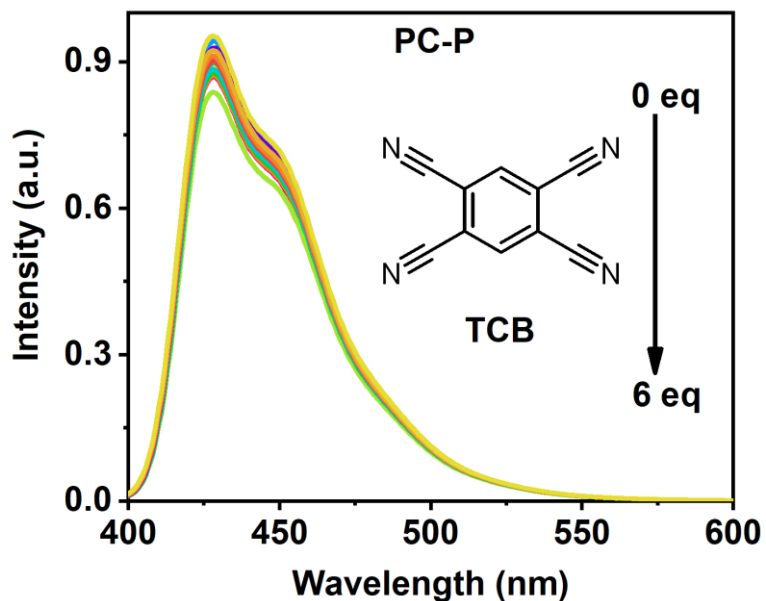

**Fig. S31** The fluorescence emission spectra of PC-P ( $1.00 \times 10^{-5}$  M, dichloromethane) in the presence of 0, 0.05, 0.10, 0.15, 0.20, 0.25, 0.30, 0.40, 0.50, 0.75, 1.0, 1.5, 2.0, 3.0, 4.0, 5.0, and 6.0 equiv. of TCB. The curve underwent a non-significant change, which indicates that almost no complexation took place in this system.

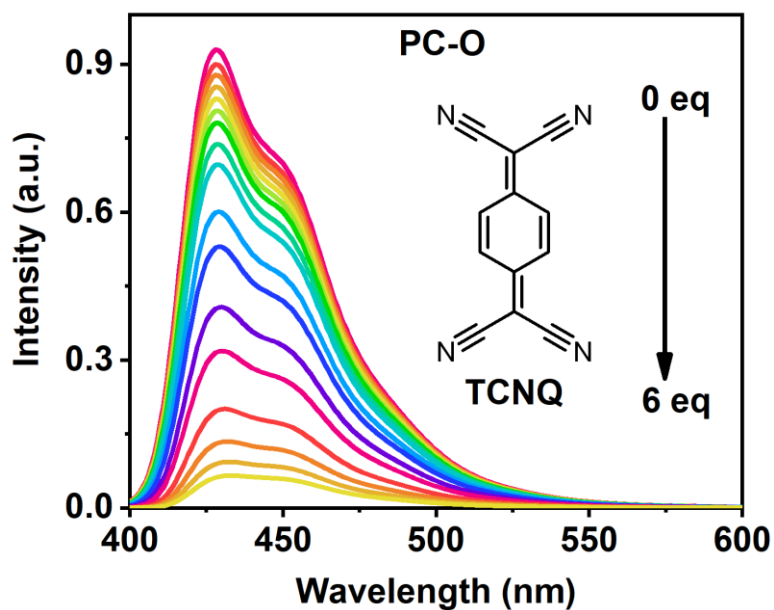

**Fig. S32** The fluorescence emission spectra of PC-O ( $1.0 \times 10^{-5}$  M, dichloromethane) in the presence of 0, 0.05, 0.10, 0.15, 0.20, 0.25, 0.30, 0.40, 0.50, 0.75, 1.0, 1.5, 2.0, 3.0, 4.0, 5.0, and 6.0 equiv. of TCNQ.

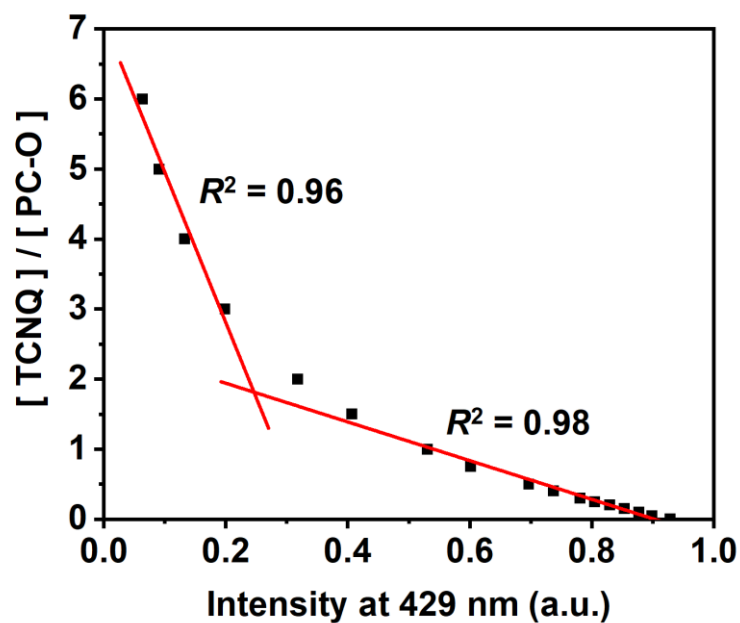

**Fig. S33** A mole ratio plot for TCNQ and PC-O, showing a 1:2 complexation stoichiometry.

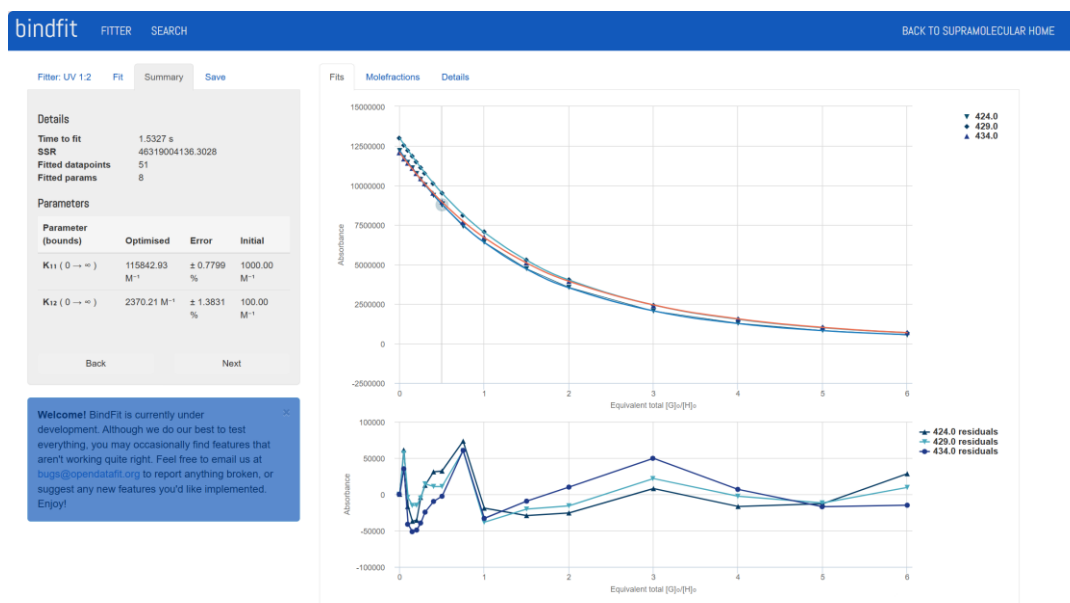

**Fig. S34** Non-linear curve-fitting graph of the complexation constants of PC-O to 2TCNQ using a 1:2 binding model by a non-linear curve-fitting method available at the website [www.supramolecular.org](http://www.supramolecular.org).

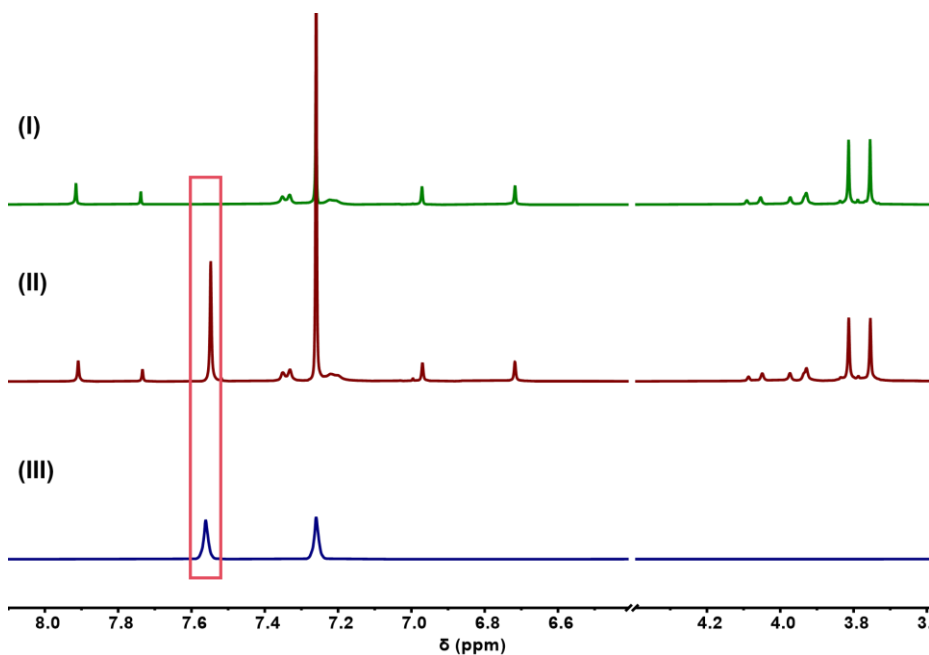

**Fig. S35** Partial <sup>1</sup>H NMR spectra (400 MHz, CDCl<sub>3</sub>, 298 K): (I) **PC-O**; (II) 0.88 mM **PC-O** and 8.8 mM **TCNQ**; (III) **TCNQ**.

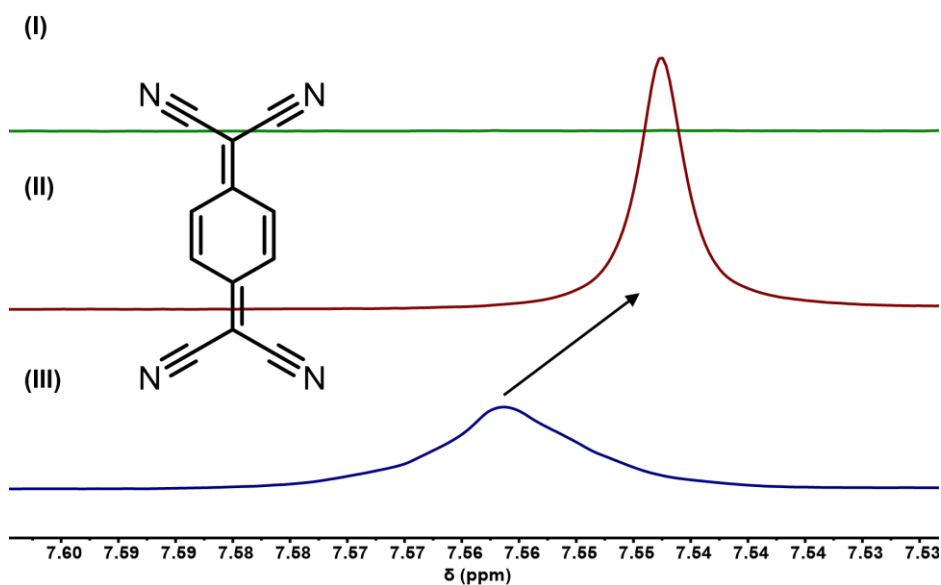

**Fig. S36** The marked region (from 7.60 ppm to 7.53 ppm) of Fig S35. The upfield shift of protons on **TCNQ** in the presence of **PC-O** suggested that the two guest molecules were in the inner space.



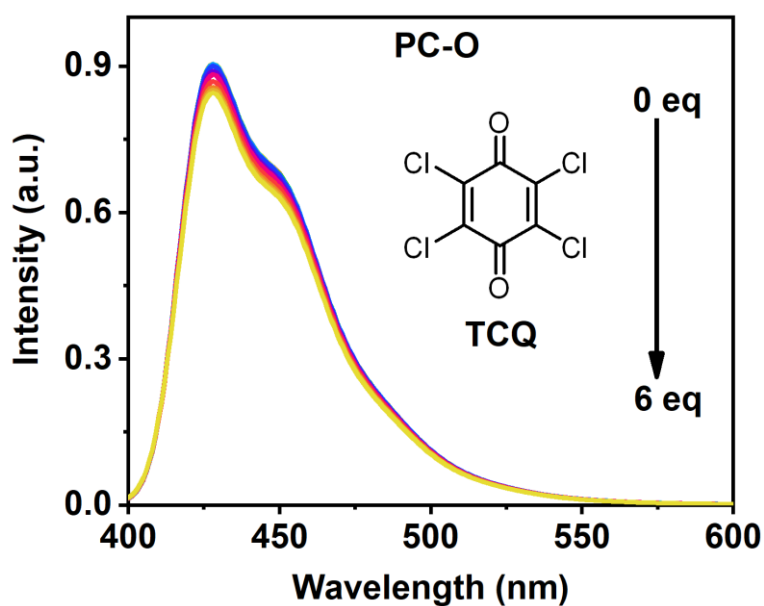

**Fig. S37** The fluorescence emission spectra of PC-O ( $1.00 \times 10^{-5}$  M, dichloromethane) in the presence of 0, 0.05, 0.10, 0.15, 0.20, 0.25, 0.30, 0.40, 0.50, 0.75, 1.0, 1.5, 2.0, 3.0, 4.0, 5.0, and 6.0 equiv. of TCQ. The curve underwent a non-significant change, which indicates that almost no complexation took place in this system.

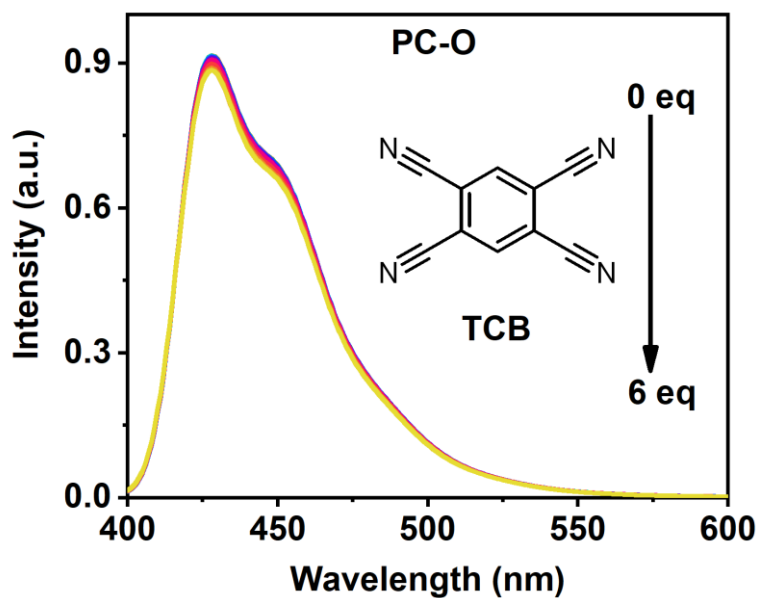

**Fig. S38** The fluorescence emission spectra of PC-O ( $1.00 \times 10^{-5}$  M, dichloromethane) in the presence of 0, 0.05, 0.10, 0.15, 0.20, 0.25, 0.30, 0.40, 0.50, 0.75, 1.0, 1.5, 2.0, 3.0, 4.0, 5.0, and 6.0 equiv. of TCB. The curve underwent a non-significant change, which indicates that almost no complexation took place in this system.

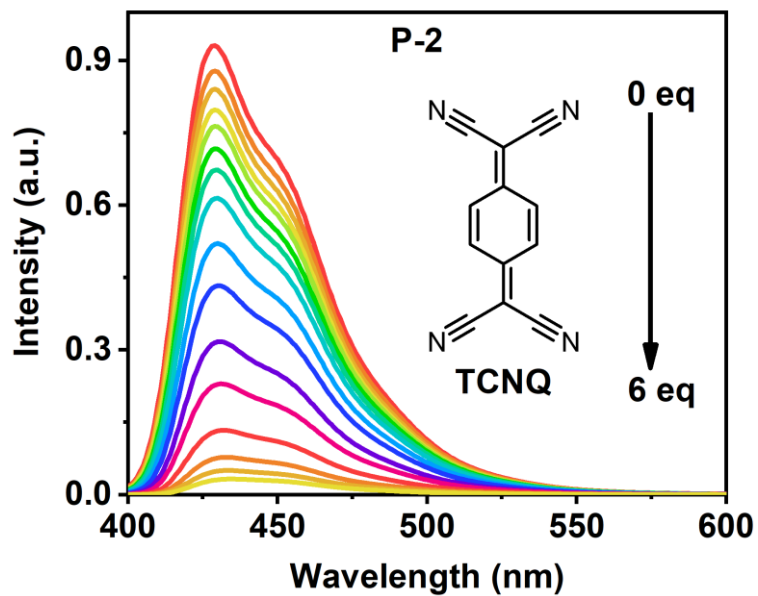

**Fig. S39** The fluorescence emission spectra of **P-2** ( $1.00 \times 10^{-5}$  M, dichloromethane) in the presence of 0, 0.05, 0.10, 0.15, 0.20, 0.25, 0.30, 0.40, 0.50, 0.75, 1.0, 1.5, 2.0, 3.0, 4.0, 5.0, and 6.0 equiv. of **TCNQ**.

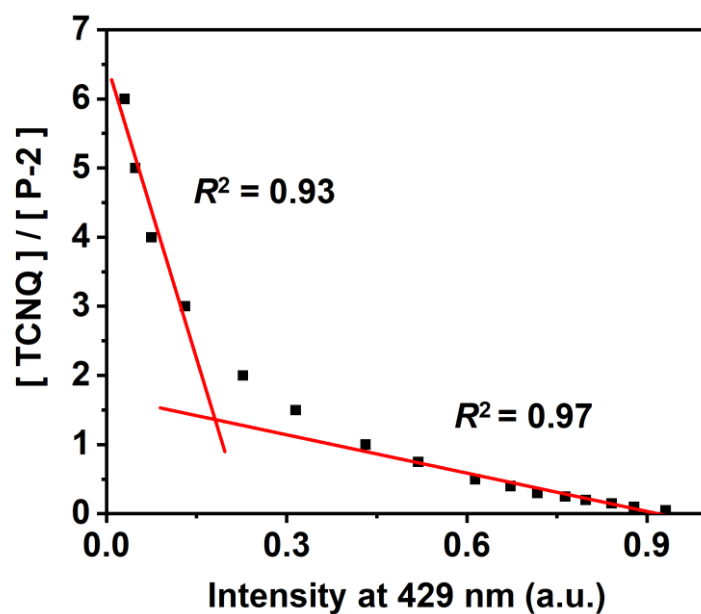

**Fig. S40** A mole ratio plot for **TCNQ** and **P-2**, showing a 1:1 complexation stoichiometry.

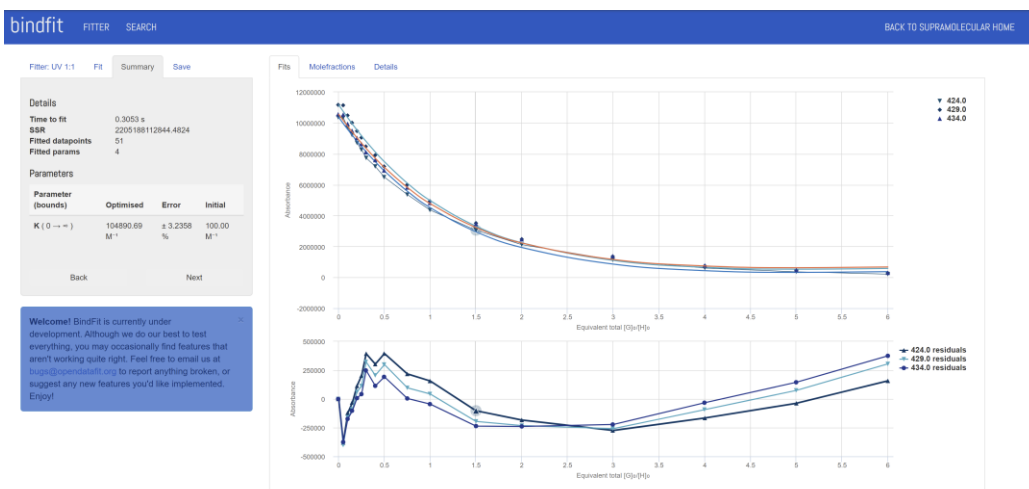

**Fig. S41** Non-linear curve-fitting graph of the complexation constants of **P-2@TCNQ** using a 1:1 binding model by a non-linear curve-fitting method available at the website [www.supramolecular.org](http://www.supramolecular.org).

## 6. Computational analysis

All-electron DFT calculations were carried out by the latest version of ORCA quantum chemistry software<sup>S2</sup> (Version 5.0.4). The BLYP functional<sup>S3-S5</sup> and def2-SVP basis set<sup>S6, S7</sup> were adopted for all calculations. The single point energy calculations were performed by B3LYP functional with def2-TZVP basis set. The DFT-D3 dispersion correction<sup>S8</sup> with BJ-damping was applied to correct the weak interactions to improve the calculation accuracy. The noncovalent interactions between **PC-P/PC-O** and **TCNQ** were studied by using the Independent Gradient Model (IGM) method through Multiwfn software.<sup>S9</sup> The visualization of IGM and orbitals were rendered by VMD software.<sup>S10</sup> Setting **PC-O** as the energy reference (zero), the relative single-point energy of **PC-P** was calculated to be 6.15 kcal/mol.

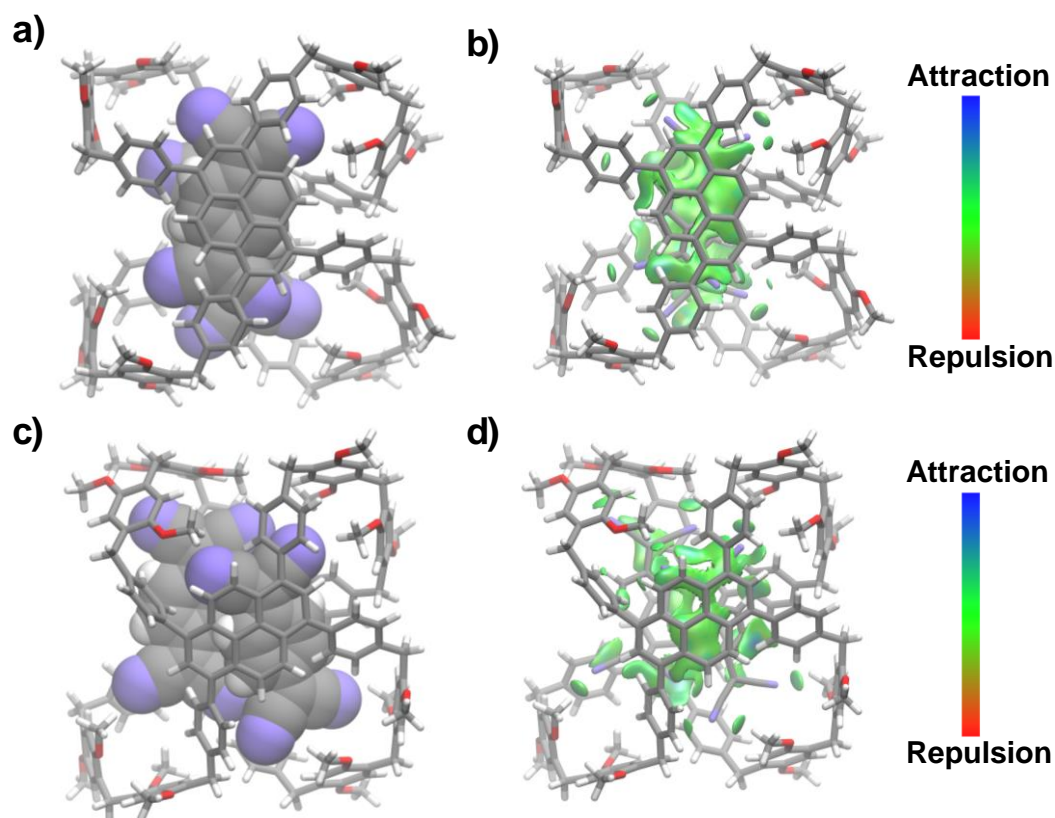

**Fig. S42** Top views of the calculated structures of (a) **PC-P**⊃**2TCNQ** and (c) **PC-O**⊃**2TCNQ**. The intermolecular binding isosurfaces (visual study of weak intermolecular interaction) between the cagearenes and **TCNQ** in (b) **PC-P**⊃**2TCNQ** and (d) **PC-O**⊃**2TCNQ**.  $\Delta\kappa$  inter ( $\rho$ ) = 0.009 au. Isosurfaces are colored according to a BGR scheme over the range  $-0.05 < \text{sign}(\lambda_2)\rho < +0.05$  au.

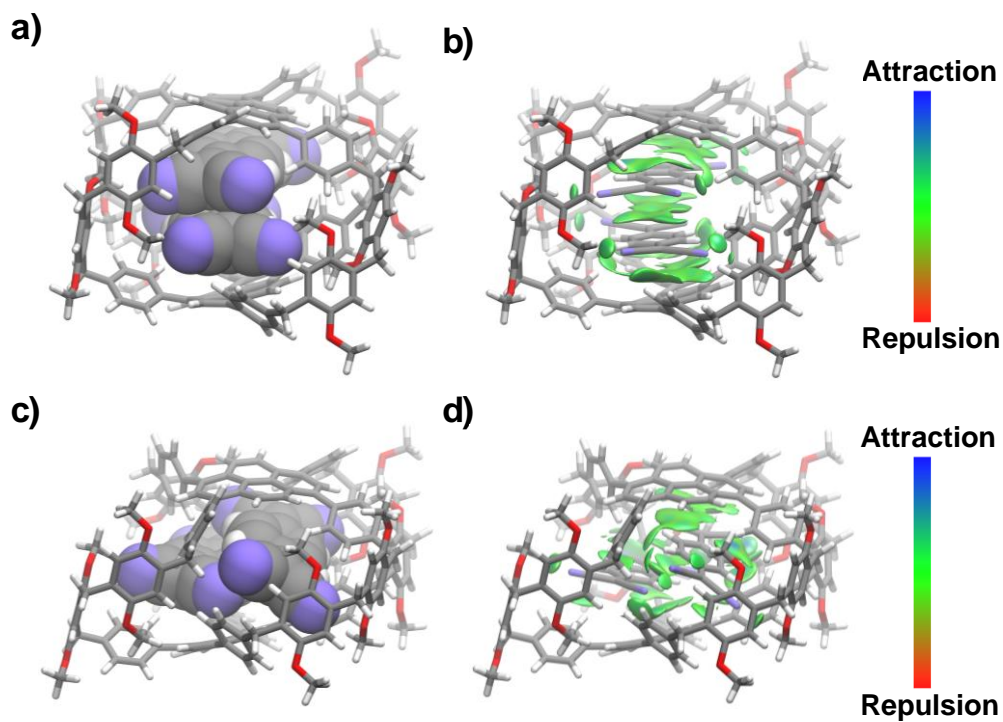

**Fig. S43** Side views of the calculated structures of (a) **PC-P $\supset$ 2TCNQ** and (c) **PC-O $\supset$ 2TCNQ**. The intermolecular binding isosurfaces (visual study of weak intermolecular interaction) between the cagearenes and **TCNQ** in (b) **PC-P $\supset$ 2TCNQ** and (d) **PC-O $\supset$ 2TCNQ**.  $\Delta\kappa$  inter ( $\rho$ ) = 0.009 au. Isosurfaces are colored according to a BGR scheme over the range  $-0.05 < \text{sign}(\lambda_2)\rho < +0.05$  au.

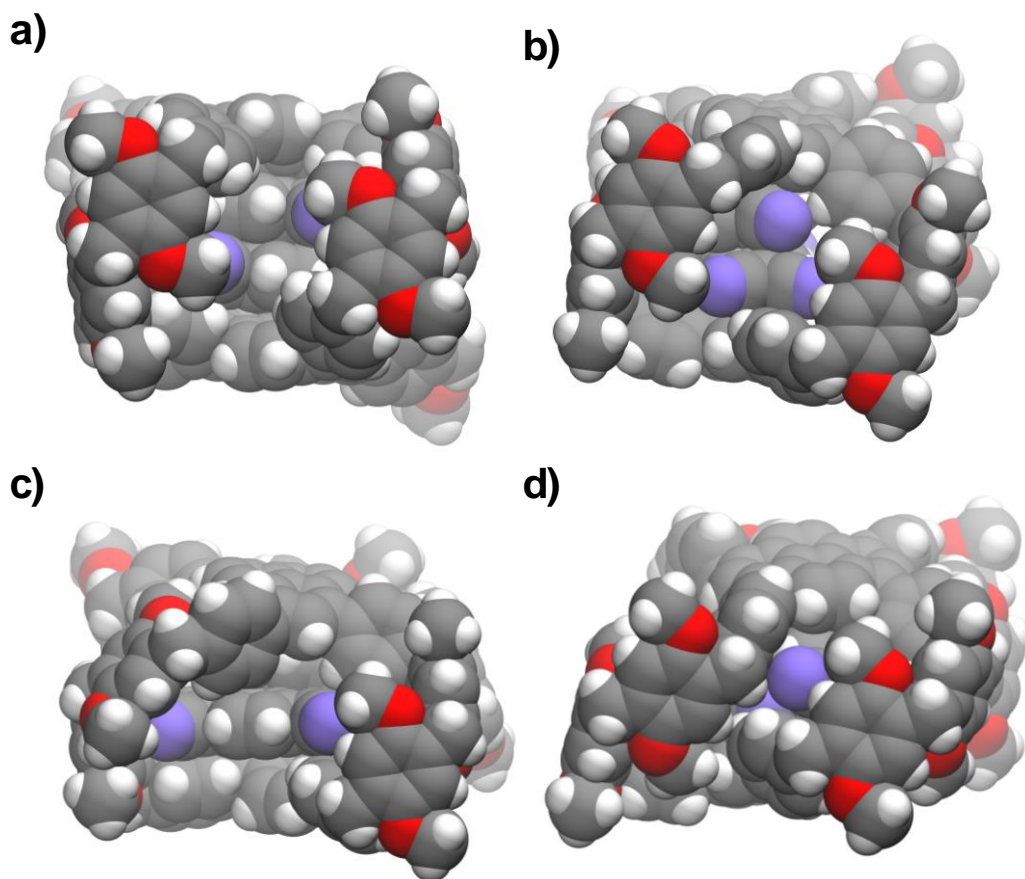

**Fig. S44** Side views of space-filling representations of (a, b) **PC-P=2TCNQ** and (c, d) **PC-O=2TCNQ**.

Optimized structure of **PC-P**

|   |                   |                   |                   |
|---|-------------------|-------------------|-------------------|
| O | 13.73860722863168 | 36.07393592545269 | 20.88916439142725 |
| O | 8.45132315714079  | 36.38620539286416 | 19.14964929800600 |
| O | 10.06306745062793 | 38.85727737747771 | 33.72393532609034 |
| O | 15.38806700918209 | 40.34449498120004 | 34.45399385809652 |
| O | 9.84074937455790  | 26.83764062412043 | 36.29435295881120 |
| O | 14.68262127837432 | 24.23902591800575 | 37.23781229985772 |
| O | 10.88090358571371 | 22.67490716885590 | 34.09257249003922 |
| O | 16.37431243355148 | 22.62946020269939 | 33.09778862929205 |
| C | 12.41922925673040 | 36.13922581480946 | 20.49612276311157 |
| C | 12.02575022483532 | 37.30094048665399 | 19.78461899600621 |
| C | 10.69670231886138 | 37.38344269347190 | 19.32768072732789 |
| H | 10.39495052429610 | 38.29383529252001 | 18.79835511730292 |
| C | 9.76452490037799  | 36.35687248374919 | 19.58215338669797 |
| C | 7.99357646696798  | 37.53811816947474 | 18.45726528560125 |
| H | 8.08489314887500  | 38.46010040168456 | 19.07559392208518 |
| H | 8.54788336678494  | 37.70133002074466 | 17.50567138022569 |
| H | 6.92623913753866  | 37.36313994836666 | 18.22636919291697 |
| C | 10.14584539151412 | 35.21838506765390 | 20.33690329532838 |
| C | 11.47786423362894 | 35.12926944584579 | 20.78227901735317 |
| H | 11.77254777336022 | 34.25198067518673 | 21.36713796727178 |
| C | 9.11719074713091  | 34.12282451098712 | 20.62318520661328 |
| H | 8.12082082707572  | 34.59778166937991 | 20.70208811504107 |
| H | 9.05794027350448  | 33.45186739812036 | 19.73743697372016 |
| C | 9.40366341015192  | 33.30048166096070 | 21.86440179073928 |
| C | 8.85545089754220  | 33.65889062180837 | 23.11582994182181 |
| H | 8.17717854675475  | 34.52348245648402 | 23.17711540645016 |
| C | 9.14358168775930  | 32.92347169583368 | 24.27629634934386 |
| H | 8.66484459536417  | 33.20313595131883 | 25.22412560996799 |
| C | 10.01320500483312 | 31.80244581742362 | 24.23861367319265 |

|   |                   |                   |                   |
|---|-------------------|-------------------|-------------------|
| C | 10.55409214509039 | 31.44194418422856 | 22.97929209949659 |
| H | 11.23774594765122 | 30.59091578497854 | 22.91009152400124 |
| C | 10.25195297279386 | 32.17304616527020 | 21.82045014155947 |
| H | 10.69686525018159 | 31.86556318878714 | 20.86192083402673 |
| C | 10.30415911644812 | 30.99055144265103 | 25.45599285632095 |
| C | 10.60400935602572 | 31.58614840820974 | 26.72559645536435 |
| C | 10.75179199157518 | 30.75021332505998 | 27.89357489031346 |
| C | 10.96457016262454 | 31.34183255349847 | 29.19503943928851 |
| C | 11.06973167884103 | 32.77521597617031 | 29.31887933623118 |
| C | 11.04681743811280 | 33.56283479356902 | 28.11540891989530 |
| H | 11.26017791006910 | 34.63503948819856 | 28.17497174188617 |
| C | 10.81201953419400 | 32.99780480327907 | 26.88616841916084 |
| H | 10.82701244005954 | 33.63079080339470 | 25.99587853321416 |
| C | 11.24987634882003 | 33.35617589169185 | 30.61448506093349 |
| C | 11.31748472660396 | 34.82954791220224 | 30.82332998178793 |
| C | 10.37700303405970 | 35.71298824198911 | 30.23580093334943 |
| H | 9.55694707670736  | 35.30215621834765 | 29.63198576830399 |
| C | 10.45511675939557 | 37.09940040564015 | 30.44110043761721 |
| H | 9.70054981335057  | 37.75709251757600 | 29.98306073800610 |
| C | 11.47415791683380 | 37.66431010747980 | 31.23586105790162 |
| C | 11.57109491738418 | 39.18089177348778 | 31.43508280698863 |
| H | 10.56316452490498 | 39.62008647924707 | 31.29958355882656 |
| H | 12.22261838784010 | 39.61509845592479 | 30.64664436471398 |
| C | 12.13509908188451 | 39.52349006525571 | 32.79851730096587 |
| C | 11.36384810812148 | 39.24796225997267 | 33.95396158873966 |
| C | 9.30303591727285  | 38.36157916624234 | 34.81721856974937 |
| H | 9.80144405742374  | 37.49364476174284 | 35.30405636494513 |
| H | 9.12254779280775  | 39.14237644516103 | 35.59017716175207 |
| H | 8.33178515352879  | 38.03567946828876 | 34.40128371052311 |
| C | 11.95439854887820 | 39.31509257984885 | 35.22982501225577 |



|   |                   |                   |                   |
|---|-------------------|-------------------|-------------------|
| H | 11.39208038847763 | 39.03414903843855 | 36.12548443742478 |
| C | 13.31171889790651 | 39.65635840087958 | 35.38860692430384 |
| C | 14.06611900042053 | 39.99825714757670 | 34.23879976673684 |
| C | 16.21580480977313 | 40.58995537545149 | 33.32560366575890 |
| H | 17.22050485877717 | 40.83115632917244 | 33.72022498283985 |
| H | 16.28935972245892 | 39.69744208146111 | 32.66437722002058 |
| H | 15.85124060586969 | 41.44912873735291 | 32.71940325195978 |
| C | 13.47342682061043 | 39.92793763591680 | 32.96036636710715 |
| H | 14.06200214903713 | 40.13184911851621 | 32.05756539967008 |
| C | 12.39352887783758 | 36.78540947075666 | 31.85017888314460 |
| H | 13.18116700416005 | 37.18908849906826 | 32.50031781593761 |
| C | 12.31128206796284 | 35.39885305996585 | 31.65672208769961 |
| H | 13.03893218039310 | 34.74516235839089 | 32.15489743449707 |
| C | 11.38697631748525 | 32.50421380797468 | 31.72461396909497 |
| H | 11.57699593540965 | 32.95852052172124 | 32.70471589080189 |
| C | 11.28577434218095 | 31.09865383649656 | 31.64768267935447 |
| C | 11.39422714801674 | 30.33117177099642 | 32.92170704262789 |
| C | 12.13817426500568 | 29.13051347760068 | 33.05365462053428 |
| H | 12.63017782157583 | 28.69759142212542 | 32.17721038138625 |
| C | 12.31788606329638 | 28.51664886662677 | 34.30498045962861 |
| H | 12.91473422210049 | 27.59587445141667 | 34.37107745413129 |
| C | 11.76238513886867 | 29.07099845669379 | 35.47830420730571 |
| C | 12.00319687661571 | 28.45917084432360 | 36.85893522456806 |
| H | 11.16885648351333 | 28.76560562075291 | 37.52205510415781 |
| H | 12.92863315962868 | 28.89814737814391 | 37.28998780672995 |
| C | 12.13506573456363 | 26.95035059106194 | 36.85355538554651 |
| C | 11.01265072053222 | 26.15131008331777 | 36.52502850459190 |
| C | 8.72484765280670  | 26.11958759383207 | 35.78604907722707 |
| H | 8.35259144007629  | 25.35865684797769 | 36.50849016409863 |
| H | 7.92874434514626  | 26.86523084454333 | 35.60540632367596 |

|   |                   |                   |                   |
|---|-------------------|-------------------|-------------------|
| H | 8.96820679443743  | 25.60645185432466 | 34.82887693549119 |
| C | 11.14447377852837 | 24.75273643619034 | 36.42556974733086 |
| H | 10.29780695398028 | 24.12870888081501 | 36.12368622604348 |
| C | 12.38147825941267 | 24.11696333663525 | 36.65000859186092 |
| C | 13.49621424490639 | 24.91263719216162 | 37.01610742531987 |
| C | 15.85612732626145 | 24.99803884456133 | 37.49364739223866 |
| H | 15.77421614538587 | 25.59029401235032 | 38.43241411599604 |
| H | 16.68240930814764 | 24.27061478537551 | 37.60126342701029 |
| H | 16.09030975660234 | 25.69303910967211 | 36.65644524434357 |
| C | 13.36378763591478 | 26.31408017350176 | 37.11018290478122 |
| H | 14.22593735069879 | 26.94270985194534 | 37.36388996485232 |
| C | 12.56393853218968 | 22.63412220608469 | 36.33707300762786 |
| H | 11.59366075187759 | 22.11220011485354 | 36.42111941505633 |
| H | 13.27574538201607 | 22.17593809794456 | 37.04753191112109 |
| C | 13.10660881008177 | 22.52380308425541 | 34.91574654050294 |
| C | 12.23198584848119 | 22.65199213970302 | 33.80659002637817 |
| C | 9.97008764493129  | 22.94990252725017 | 33.03604273717860 |
| H | 8.96098662209527  | 22.96424119600242 | 33.48837960354439 |
| H | 10.17237246309886 | 23.93708450519548 | 32.56391990219819 |
| H | 9.99906522041670  | 22.16641062033164 | 32.24633896506303 |
| C | 12.75856669559638 | 22.78123358580247 | 32.50676436096592 |
| H | 12.09318624598744 | 22.92069351034066 | 31.64629849995904 |
| C | 14.14763720313459 | 22.78604001361776 | 32.27512185091487 |
| C | 15.01880917429636 | 22.61156497434848 | 33.37658216451699 |
| C | 17.28579072074428 | 22.47610732050673 | 34.17776655626672 |
| H | 17.14927147141368 | 21.50354992700594 | 34.70098271787552 |
| H | 18.30017025098111 | 22.51191503450260 | 33.73915901115959 |
| H | 17.18346411251670 | 23.29431978806759 | 34.92563226132474 |
| C | 14.49272093466060 | 22.47402401394558 | 34.67686174171335 |
| H | 15.15486952102766 | 22.39467032593520 | 35.54403306902711 |

|   |                   |                   |                   |
|---|-------------------|-------------------|-------------------|
| C | 10.98897346700911 | 30.24359952643566 | 35.34754565329555 |
| H | 10.51530255000272 | 30.67937905148544 | 36.24058418248270 |
| C | 10.80790715944069 | 30.85879004554624 | 34.10174332099766 |
| H | 10.19007786618652 | 31.76442244672462 | 34.03386769337793 |
| C | 11.04983809733667 | 30.49982913476159 | 30.36821307366598 |
| C | 10.82553955029394 | 29.08796831759330 | 30.20176132814483 |
| H | 10.76596690519212 | 28.45105717329817 | 31.09044929420673 |
| C | 10.66609691832934 | 28.52225723959327 | 28.95832482786056 |
| H | 10.48970841616479 | 27.44349189154293 | 28.87160839521335 |
| C | 10.67527308507598 | 29.31867669941429 | 27.76017271248887 |
| C | 10.53551986055807 | 28.74012361857011 | 26.45962919532699 |
| C | 10.66751130491230 | 27.26908657635546 | 26.26631204016642 |
| C | 11.81447264622603 | 26.59965882547082 | 26.75988082265862 |
| H | 12.59698124210956 | 27.18537217569002 | 27.25624311713170 |
| C | 11.96639009382971 | 25.21422820270783 | 26.60248639830131 |
| H | 12.87123378799494 | 24.72364165582661 | 26.99166999467072 |
| C | 10.98378521598534 | 24.44565926870188 | 25.94165457629452 |
| C | 11.20321844949574 | 22.95687446007437 | 25.68645810963155 |
| H | 11.91283540948391 | 22.55443414332175 | 26.43584057727135 |
| H | 10.25025353858996 | 22.40537591050862 | 25.78289187313750 |
| C | 9.84893645585752  | 25.11368362900028 | 25.42805535102007 |
| H | 9.08700888697921  | 24.53016734041783 | 24.89335687835444 |
| C | 9.69298186938289  | 26.50090873708308 | 25.58615577106122 |
| H | 8.79201845968025  | 26.99893660548888 | 25.19910373513987 |
| C | 10.30404309435414 | 29.58331183775383 | 25.35694948975537 |
| H | 10.13303322316326 | 29.12330544470813 | 24.37470566921181 |
| C | 12.97578965740889 | 38.49015172859028 | 19.65518615587206 |
| H | 12.51906990529937 | 39.24628442014904 | 18.98820611821979 |
| H | 13.93902210369122 | 38.17457406971138 | 19.20930112141775 |
| C | 14.09848619612136 | 35.11526586441067 | 21.88003018648646 |

|   |                   |                   |                   |
|---|-------------------|-------------------|-------------------|
| H | 13.49342861554778 | 35.24116216379946 | 22.80273081666718 |
| H | 13.98856895045989 | 34.07124529080682 | 21.51465477195380 |
| H | 15.16101240781801 | 35.29970401601548 | 22.12490889951666 |
| O | 12.49800132498648 | 37.23921258106921 | 37.54257933632707 |
| O | 17.70130003012144 | 36.23226895069935 | 35.78789664587228 |
| O | 15.77439936180827 | 38.88423179666913 | 23.77898070755447 |
| O | 11.01231231508547 | 39.89526268788939 | 21.06790013831135 |
| O | 15.67206358007394 | 27.47544366277273 | 20.44376791326443 |
| O | 11.05148713401914 | 24.51466467734381 | 19.46120934540547 |
| O | 15.01165882525018 | 23.13227662730510 | 22.45566803012556 |
| O | 9.56643622379664  | 22.42298658843984 | 23.46127871312775 |
| C | 13.78611734715674 | 36.95438759100035 | 37.13024893453186 |
| C | 14.59408482021913 | 38.06592077675135 | 36.77980417239760 |
| C | 15.91103806218746 | 37.82685960024047 | 36.34344563850294 |
| H | 16.50979910348721 | 38.69258056452156 | 36.04450772761074 |
| C | 16.42548022423071 | 36.51818773602847 | 36.24138315773508 |
| C | 18.54320860387357 | 37.31633690994612 | 35.41694167397365 |
| H | 18.10901301170773 | 37.91063131024241 | 34.58178338294653 |
| H | 18.73762170353001 | 38.00240590084888 | 36.27134496440119 |
| H | 19.49925151296885 | 36.87085091952442 | 35.08525683565837 |
| C | 15.62372853341872 | 35.40880271543645 | 36.60317786922246 |
| C | 14.30763402398151 | 35.64796568151502 | 37.04423103495169 |
| H | 13.69225509868400 | 34.78116784983226 | 37.31409971961237 |
| C | 16.15359045784675 | 33.98519773135127 | 36.49024162259233 |
| H | 17.25356379003891 | 34.00436568198340 | 36.61085714695049 |
| H | 15.73697860951664 | 33.38136854620220 | 37.32031670830958 |
| C | 15.80547646619810 | 33.30629256797239 | 35.16859373387836 |
| C | 16.45179648126011 | 33.67369718512483 | 33.96552668837221 |
| H | 17.21328817149528 | 34.46550023325135 | 33.99200579581282 |
| C | 16.15207438804267 | 33.02507000175854 | 32.75768262357593 |

|   |                   |                   |                   |
|---|-------------------|-------------------|-------------------|
| H | 16.69931152597234 | 33.30052727298632 | 31.84551241188733 |
| C | 15.19269375689423 | 31.98059330343421 | 32.70185165277511 |
| C | 14.53261692617225 | 31.63213248672535 | 33.90462941778324 |
| H | 13.77975757247199 | 30.83795041730128 | 33.89573014783752 |
| C | 14.83148112832452 | 32.28815922455495 | 35.11019853449505 |
| H | 14.30138752551720 | 31.98853899417246 | 36.02725689706431 |
| C | 14.94795469402507 | 31.20634892861255 | 31.44919766880678 |
| C | 14.68084374233018 | 31.83292452045014 | 30.18948371272231 |
| C | 14.55340459697288 | 31.02413329192760 | 29.00070867543408 |
| C | 14.33586754749794 | 31.64692934416315 | 27.71509681878048 |
| C | 14.20956434659071 | 33.08173186089125 | 27.63021729640146 |
| C | 14.25793487773890 | 33.84609404831764 | 28.84762085560929 |
| H | 14.06438788731004 | 34.92345177383380 | 28.80969832758938 |
| C | 14.49715610648462 | 33.25153718558792 | 30.06256286561393 |
| H | 14.51172139560238 | 33.86647396419967 | 30.96597444020832 |
| C | 13.97610916706793 | 33.68719555831036 | 26.35630960698458 |
| C | 13.83960311623838 | 35.16195104500346 | 26.18605360099863 |
| C | 14.81851059146306 | 36.06117553638410 | 26.67513380092398 |
| H | 15.69314004205486 | 35.66338460304191 | 27.20769166075501 |
| C | 14.71536511444963 | 37.44317907327756 | 26.44439060007642 |
| H | 15.51198596954770 | 38.11377730029211 | 26.79843219939361 |
| C | 13.62873238646687 | 37.98319339688086 | 25.72763845164549 |
| C | 13.57127236269324 | 39.46586716356170 | 25.34793719723460 |
| H | 14.46252110762947 | 39.98272774519391 | 25.75233449969299 |
| H | 12.67277665742239 | 39.94510048409508 | 25.78801083469729 |
| C | 13.50756839346729 | 39.56367209830609 | 23.83170437664699 |
| C | 14.61540922991504 | 39.11802197687798 | 23.06895105072329 |
| C | 16.84863354753373 | 38.22025870309741 | 23.12788153499297 |
| H | 16.54203596387724 | 37.22351421431303 | 22.74013601255151 |
| H | 17.25779165307604 | 38.81746324717413 | 22.28254831502712 |

|   |                   |                   |                   |
|---|-------------------|-------------------|-------------------|
| H | 17.63902653295432 | 38.08315355805448 | 23.88873976794481 |
| C | 14.46436890814105 | 38.85923866637845 | 21.69369969520320 |
| H | 15.27904319686422 | 38.40707888647612 | 21.11772799174273 |
| C | 13.23372875731609 | 39.06526926168510 | 21.04358590412003 |
| C | 12.16740361565393 | 39.64284640834028 | 21.77723747688869 |
| C | 9.81918345226588  | 40.17443236739294 | 21.78635238388673 |
| H | 9.00827694463285  | 40.23370390628265 | 21.03624301301366 |
| H | 9.57990943869802  | 39.36790462888175 | 22.51457216656965 |
| H | 9.87468584001931  | 41.14305557975268 | 22.33226378602252 |
| C | 12.30572655406640 | 39.86633361299882 | 23.16357177600049 |
| H | 11.45757337579350 | 40.22843264535751 | 23.75794567426300 |
| C | 12.64423367676560 | 37.09110867216303 | 25.24834834441372 |
| H | 11.80145051753248 | 37.48068384761162 | 24.65981187213637 |
| C | 12.74807350903353 | 35.70995694274969 | 25.46649866990064 |
| H | 11.97381820256996 | 35.04321750940289 | 25.06421544665088 |
| C | 13.84175955509733 | 32.86333628062411 | 25.22659927222533 |
| H | 13.61249312930457 | 33.33947198678931 | 24.26633839872965 |
| C | 13.99601769061423 | 31.45977305984491 | 25.25862736420253 |
| C | 13.90508263310744 | 30.72676812516874 | 23.96343956577423 |
| C | 13.25796378147558 | 29.47429950307129 | 23.80589718507914 |
| H | 12.80685039402108 | 28.98200513544311 | 24.67297312973149 |
| C | 13.11076271241731 | 28.88118412470451 | 22.53973650546307 |
| H | 12.58737063954185 | 27.91796924592757 | 22.45607773702854 |
| C | 13.59384934500329 | 29.51351069416649 | 21.37394732086762 |
| C | 13.37068056833706 | 28.92907554356571 | 19.97923602945263 |
| H | 14.15858390472879 | 29.32801472261645 | 19.30864630266284 |
| H | 12.40135853857199 | 29.30337610087956 | 19.58509358039313 |
| C | 13.36538477752364 | 27.41543582881968 | 19.92970275107533 |
| C | 14.55836983598477 | 26.70171106288619 | 20.20110415273638 |
| C | 16.85692697615279 | 26.83326764091463 | 20.89416257575682 |

|   |                   |                   |                   |
|---|-------------------|-------------------|-------------------|
| H | 17.27769770095133 | 26.14566101632009 | 20.12628402915149 |
| H | 17.58918207155515 | 27.63568292258888 | 21.09995212307851 |
| H | 16.67950140377755 | 26.25258921364300 | 21.82685718041038 |
| C | 14.54951429079363 | 25.29359867597427 | 20.23222235118119 |
| H | 15.45387577635578 | 24.73146926812486 | 20.48429873899268 |
| C | 13.36740320632523 | 24.56456219061091 | 19.99650382396072 |
| C | 12.17990566628415 | 25.27746829049012 | 19.69469098933687 |
| C | 9.80797593139036  | 25.17894312887395 | 19.28446044209744 |
| H | 9.80268944767209  | 25.82289693920099 | 18.37663452693545 |
| H | 9.04465246104279  | 24.38743185565213 | 19.16434287217914 |
| H | 9.54532500671679  | 25.80628244660298 | 20.16543903637434 |
| C | 12.18961767932976 | 26.68790559061469 | 19.66680943768941 |
| H | 11.27181656865332 | 27.25032807659442 | 19.45637190654892 |
| C | 13.32248749513618 | 23.05503573261531 | 20.21830138617979 |
| H | 14.33523202867725 | 22.63034178134411 | 20.09407281201813 |
| H | 12.64829795441478 | 22.57983578367497 | 19.48253273559886 |
| C | 12.80696195607828 | 22.79930005984709 | 21.63065628932483 |
| C | 13.67392327990512 | 22.94491273557626 | 22.74344395492577 |
| C | 15.89465065661778 | 23.45376441427944 | 23.52270958296803 |
| H | 16.88931831544690 | 23.61711015327629 | 23.06758125061112 |
| H | 15.57948645631277 | 24.37969246109449 | 24.05323243015662 |
| H | 15.97071124570689 | 22.62795787704725 | 24.26486240551168 |
| C | 13.15037867120895 | 22.92534223964187 | 24.05069330476356 |
| H | 13.80637392025370 | 23.07665723203310 | 24.91632163264508 |
| C | 11.77131951596021 | 22.76349621521175 | 24.28602157287839 |
| C | 10.91277555303317 | 22.57147687572390 | 23.17743223145746 |
| C | 8.66349615946960  | 22.25470765889251 | 22.37639613821723 |
| H | 8.89096492969623  | 21.34012043415440 | 21.78457413021235 |
| H | 7.65551192042995  | 22.15642611029080 | 22.82021324780638 |
| H | 8.67461737603801  | 23.12979843823570 | 21.68856422271796 |

|   |                   |                   |                   |
|---|-------------------|-------------------|-------------------|
| C | 11.43697493815017 | 22.58300500489540 | 21.86913054047371 |
| H | 10.77886132187036 | 22.49103301748058 | 21.00012061189812 |
| C | 14.27087275983642 | 30.74175565504862 | 21.52771774917033 |
| H | 14.69048084667333 | 31.24155655700213 | 20.64126124707258 |
| C | 14.42760932553428 | 31.33017224273330 | 22.78913794676738 |
| H | 14.98195286213888 | 32.27393349386601 | 22.87444846634419 |
| C | 14.26523859856682 | 30.83515769976359 | 26.51917495162675 |
| C | 14.53452476432942 | 29.42663713585453 | 26.64791794895320 |
| H | 14.62446674535229 | 28.81738642210393 | 25.74308238452242 |
| C | 14.70563938163115 | 28.83117762198567 | 27.87490378283309 |
| H | 14.92182861636526 | 27.75791215537760 | 27.92978711660874 |
| C | 14.66282059158228 | 29.59064623800336 | 29.09631402188471 |
| C | 14.81410879460028 | 28.97879515687683 | 30.37984453479849 |
| C | 14.79651721560017 | 27.49593149697238 | 30.52540363587270 |
| C | 13.73270706429633 | 26.73808158403223 | 29.97737659549753 |
| H | 12.90663844686802 | 27.26255864289756 | 29.48516206805841 |
| C | 13.71632796617881 | 25.33865612913094 | 30.07439866753962 |
| H | 12.87529216087667 | 24.77897682344988 | 29.63828971882015 |
| C | 14.75707592024000 | 24.64246206506612 | 30.72557143939238 |
| C | 14.69384177511559 | 23.12684205940489 | 30.89478110088227 |
| H | 14.03254607761265 | 22.69709452781676 | 30.11685867681980 |
| H | 15.70013048167630 | 22.68598408556745 | 30.77154277462927 |
| C | 15.80553017323487 | 25.39697925078233 | 31.30008087879254 |
| H | 16.61100404644764 | 24.86861563640266 | 31.82829079998032 |
| C | 15.82476960822487 | 26.79810420635972 | 31.20372040080015 |
| H | 16.66258277408206 | 27.36551145689369 | 31.63439416406420 |
| C | 14.98604594741309 | 29.79887301286175 | 31.51137486053518 |
| H | 15.15184141546746 | 29.32146013210952 | 32.48585784647380 |
| C | 14.00244295055375 | 39.47256242986959 | 36.73535330451928 |
| H | 14.80763273838029 | 40.21895881077239 | 36.85910014889198 |



|   |                   |                   |                   |
|---|-------------------|-------------------|-------------------|
| H | 13.27129628257174 | 39.60297342606810 | 37.55354338239869 |
| C | 11.60915201427231 | 36.15576468892269 | 37.78098925229894 |
| H | 11.49035497926462 | 35.51454804532347 | 36.87924747623530 |
| H | 11.94661868928164 | 35.51667340151302 | 38.62744620685930 |
| H | 10.63152397701400 | 36.60371029699596 | 38.03940496632046 |

Optimized structure of **PC-O**

|   |                   |                   |                   |
|---|-------------------|-------------------|-------------------|
| O | 13.99129558644260 | 36.96638182252721 | 20.62167300129186 |
| O | 8.48023172106464  | 36.07798382810743 | 20.70524382197529 |
| O | 10.48986436788577 | 39.69372577625337 | 32.32492670236175 |
| O | 15.72349669647710 | 39.74050905337352 | 34.24405551236840 |
| O | 10.58866253276294 | 27.22920344080078 | 36.55784948592239 |
| O | 15.71703216728318 | 25.04370717525399 | 36.35030902849402 |
| O | 11.23302258557593 | 22.52778237709656 | 34.80705930169375 |
| O | 15.85799419258315 | 23.08127348921755 | 31.73791180815018 |
| C | 12.63319445449578 | 36.71034306730069 | 20.62025200743797 |
| C | 11.78633601009784 | 37.82538534200356 | 20.84354424083138 |
| C | 10.39486621201030 | 37.61652790293427 | 20.87005529487492 |
| H | 9.75701109283265  | 38.48227979097062 | 21.07458766611411 |
| C | 9.83939891168708  | 36.33618666460137 | 20.66719491592209 |
| C | 7.59343457451227  | 37.16494107405403 | 20.93533693627051 |
| H | 7.77896730191797  | 37.65002010241432 | 21.91990245294338 |
| H | 7.67335987121633  | 37.94059693365943 | 20.14121806259092 |
| H | 6.57167810267095  | 36.74237177049254 | 20.92721514879986 |
| C | 10.68275110338200 | 35.22879064290569 | 20.40732558679159 |
| C | 12.07622306785921 | 35.43470126690293 | 20.39731183140829 |
| H | 12.72130922464201 | 34.56725155025807 | 20.21199339870846 |
| C | 10.10573454096225 | 33.83399643804910 | 20.19113354416972 |
| H | 9.08278481845399  | 33.92852774436463 | 19.78052459685312 |
| H | 10.72256630293294 | 33.30051792667988 | 19.44133232868638 |

|   |                   |                   |                   |
|---|-------------------|-------------------|-------------------|
| C | 10.06946930188548 | 33.01752261725584 | 21.47855408805327 |
| C | 9.11964957196363  | 33.30185437357958 | 22.48696097800489 |
| H | 8.37739158019355  | 34.09218347182509 | 22.30900770721891 |
| C | 9.12628451006689  | 32.59963204714366 | 23.70129631366231 |
| H | 8.37435498710755  | 32.83020736413152 | 24.46932066505891 |
| C | 10.08520878885126 | 31.58714627728301 | 23.95341847649745 |
| C | 11.01853187295237 | 31.28861307880752 | 22.93491854925870 |
| H | 11.76916107149661 | 30.51189642868052 | 23.10658055882744 |
| C | 11.01143365660721 | 31.99676120938190 | 21.72125297823333 |
| H | 11.76255568989486 | 31.75191948398799 | 20.95480644654963 |
| C | 10.13349176229695 | 30.84944052710415 | 25.25078905611870 |
| C | 10.31964239003646 | 31.53152452481331 | 26.49250729712092 |
| C | 10.38917474815047 | 30.77331041444354 | 27.71854074738015 |
| C | 10.60438729869355 | 31.45428009880585 | 28.97543519099716 |
| C | 10.73004374885871 | 32.89344886078613 | 29.00513990853695 |
| C | 10.65774531567429 | 33.60417227579767 | 27.75768326025996 |
| H | 10.76757504942178 | 34.69087071869632 | 27.76626505293257 |
| C | 10.48091681183523 | 32.95774063252011 | 26.55977703985461 |
| H | 10.48034426886552 | 33.53529625645056 | 25.62882768410657 |
| C | 10.98324165401394 | 33.55453539966997 | 30.25004952656617 |
| C | 11.26197960815636 | 35.01667090633601 | 30.34161714054775 |
| C | 10.45564477805905 | 36.01918097624589 | 29.74931203281804 |
| H | 9.51094942415797  | 35.73836812206104 | 29.26398504077826 |
| C | 10.83636943530871 | 37.37225637008436 | 29.79253495838815 |
| H | 10.19100098022662 | 38.13441644296081 | 29.33104543392366 |
| C | 12.03262038662342 | 37.77235444868678 | 30.42075045394266 |
| C | 12.48224656432685 | 39.23308370267571 | 30.46708796479906 |
| H | 11.68260045371358 | 39.87741297100175 | 30.05451306100396 |
| H | 13.38048762298171 | 39.35602524711482 | 29.82848121413744 |
| C | 12.81504460799367 | 39.61239447724501 | 31.89849623724141 |

|   |                   |                   |                   |
|---|-------------------|-------------------|-------------------|
| C | 11.76717512677420 | 39.72476695322997 | 32.84501001265817 |
| C | 9.39228326149094  | 39.64454946221981 | 33.22436981793554 |
| H | 9.44304100337057  | 38.75340283483789 | 33.88899426304154 |
| H | 9.33262574564462  | 40.55513389636906 | 33.86209592298657 |
| H | 8.48000177005340  | 39.57913317340704 | 32.60298446514478 |
| C | 12.06154678809257 | 39.78982120888894 | 34.22053810069262 |
| H | 11.25925232285280 | 39.80013741528204 | 34.96564609617594 |
| C | 13.39049298805422 | 39.75506386342879 | 34.68545734888035 |
| C | 14.44065015186040 | 39.72850612370775 | 33.73421174940201 |
| C | 16.80148157768544 | 39.43034392392509 | 33.37211847934633 |
| H | 17.71260088234541 | 39.39772338643996 | 33.99886344787304 |
| H | 16.66192670845881 | 38.44108796771209 | 32.88216217506659 |
| H | 16.93900557568895 | 40.20246066207842 | 32.58211393806380 |
| C | 14.14539696301004 | 39.65041729056350 | 32.35639223565783 |
| H | 14.94910957379080 | 39.56441865887176 | 31.61479747694142 |
| C | 12.80473670310911 | 36.78160551491531 | 31.06355019525568 |
| H | 13.72183443890414 | 37.06931942911496 | 31.59485565035345 |
| C | 12.42400143677714 | 35.43654950941846 | 31.03450379801408 |
| H | 13.05329483203114 | 34.68601786321493 | 31.52393981131265 |
| C | 11.12794955349120 | 32.77259201918211 | 31.41155762093090 |
| H | 11.37973808138313 | 33.28082888447894 | 32.35077214558117 |
| C | 11.01425129037171 | 31.36871162547531 | 31.42141912961240 |
| C | 11.30638921121666 | 30.66227505812137 | 32.70008636124278 |
| C | 12.21341397040697 | 29.57382738699318 | 32.75168843948562 |
| H | 12.64722962026920 | 29.19457565429111 | 31.81979248643691 |
| C | 12.63285073762911 | 29.03564067938478 | 33.97734099919349 |
| H | 13.35648582145734 | 28.20833565277335 | 33.98467673729681 |
| C | 12.16082083402009 | 29.55515905615267 | 35.20217858987768 |
| C | 12.68226353814599 | 29.03213705973129 | 36.54054588957261 |
| H | 11.95448251697305 | 29.30268333766757 | 37.33101929000482 |

|   |                   |                   |                   |
|---|-------------------|-------------------|-------------------|
| H | 13.63074847880887 | 29.55849274998437 | 36.78218736397145 |
| C | 12.93336552072918 | 27.53769765488415 | 36.55043867940539 |
| C | 11.83474440124218 | 26.64325231462151 | 36.52651513653120 |
| C | 9.44663500902859  | 26.39571601488541 | 36.41331753761949 |
| H | 9.34759680162021  | 25.67440386210266 | 37.25554952694063 |
| H | 8.56803575657220  | 27.06689436016597 | 36.40754084559882 |
| H | 9.47359944100190  | 25.82177759674315 | 35.46009227492513 |
| C | 12.05549260083215 | 25.25397784051725 | 36.45669730526416 |
| H | 11.21799692840081 | 24.55053608403203 | 36.40503801512801 |
| C | 13.35940890771268 | 24.72266026599062 | 36.40214247119655 |
| C | 14.45914991082742 | 25.61561280837143 | 36.42698140669511 |
| C | 16.85126324481579 | 25.90069857257851 | 36.34876081913310 |
| H | 16.91753019273109 | 26.50473237022566 | 37.28102379282572 |
| H | 17.73913463913289 | 25.24490274233163 | 36.28189760444889 |
| H | 16.84558834175585 | 26.59475231926619 | 35.47840748775693 |
| C | 14.23633621878665 | 27.00712210816594 | 36.50862717204715 |
| H | 15.07840142464570 | 27.70977477375327 | 36.52090654430964 |
| C | 13.57679236686536 | 23.22826515883476 | 36.18953488811103 |
| H | 12.76965553656914 | 22.66086693685223 | 36.68617021707941 |
| H | 14.54345312984879 | 22.92585569370877 | 36.63048162453913 |
| C | 13.57610719383122 | 22.92572123422033 | 34.69533077907173 |
| C | 12.36580095975598 | 22.63312551278145 | 34.01956499134254 |
| C | 9.98973716975744  | 22.25881503791006 | 34.17281913022249 |
| H | 9.23113237877282  | 22.21536706083659 | 34.97621203074453 |
| H | 9.70968505671373  | 23.05950810921932 | 33.45187315459575 |
| H | 10.00023218199788 | 21.28593420339217 | 33.63252278663838 |
| C | 12.35848160587738 | 22.49216561375820 | 32.61494832555792 |
| H | 11.42506860676618 | 22.28510462484023 | 32.07746085832251 |
| C | 13.53520582067635 | 22.65098136343999 | 31.85927524942710 |
| C | 14.74730189886200 | 22.92815476766554 | 32.53842662218675 |

|   |                   |                   |                   |
|---|-------------------|-------------------|-------------------|
| C | 17.06839013716281 | 23.51999090119789 | 32.34047565351377 |
| H | 17.46482080697194 | 22.77720096256488 | 33.06877208945637 |
| H | 17.79865238281935 | 23.64659625008776 | 31.52004912765490 |
| H | 16.93666372624885 | 24.49203989115519 | 32.86612410793373 |
| C | 14.75777878787191 | 23.06079425597686 | 33.94008290253365 |
| H | 15.67663635965721 | 23.31768069827393 | 34.47710414979294 |
| C | 11.22542481423302 | 30.61035717306910 | 35.15491760550788 |
| H | 10.82014607991929 | 31.01295886475476 | 36.09581504700535 |
| C | 10.80963662860877 | 31.15789174435696 | 33.93115045728241 |
| H | 10.08555468296301 | 31.98485443814866 | 33.92219175919166 |
| C | 10.70575946716858 | 30.69346667148599 | 30.19832754868873 |
| C | 10.43215945834992 | 29.28196362096372 | 30.14101442853149 |
| H | 10.37429387088378 | 28.71776819774197 | 31.07994791762673 |
| C | 10.20648874606855 | 28.63794000682200 | 28.94633473631220 |
| H | 9.96706153462968  | 27.56922677574771 | 28.95176477779424 |
| C | 10.25641469459832 | 29.33523798948820 | 27.68596940659850 |
| C | 10.13693907155784 | 28.66703857031572 | 26.42209969097429 |
| C | 10.14678180653229 | 27.18345518231504 | 26.29283460338494 |
| C | 11.04902235022186 | 26.39910839165103 | 27.04999508975356 |
| H | 11.71551565181318 | 26.88828763850349 | 27.75981895807706 |
| C | 11.13937535666484 | 25.01093117890331 | 26.87951846065743 |
| H | 11.86671031563382 | 24.44906364904066 | 27.48258248432293 |
| C | 10.33305488614459 | 24.34529940245661 | 25.93455165002426 |
| C | 10.51866548253947 | 22.85824285993001 | 25.66122276996697 |
| H | 11.06514284975983 | 22.39734984052875 | 26.50791973759942 |
| H | 9.53957473599646  | 22.35386962145246 | 25.57208696124927 |
| C | 9.42542517041290  | 25.11742941762981 | 25.17249089078530 |
| H | 8.79582984536313  | 24.61233957826088 | 24.42537489544700 |
| C | 9.33104191926718  | 26.50684038524966 | 25.34820693587348 |
| H | 8.60663966495988  | 27.08028362483540 | 24.75249721033736 |

|   |                   |                   |                   |
|---|-------------------|-------------------|-------------------|
| C | 10.06528911773664 | 29.44610434628647 | 25.24786268306121 |
| H | 9.97843958208644  | 28.93835060619046 | 24.27974327189470 |
| C | 12.37731420072831 | 39.20881274815053 | 21.09146517702340 |
| H | 11.62839279439141 | 39.97333686593681 | 20.81383736312902 |
| H | 13.26566834196587 | 39.34457995779890 | 20.44715388106516 |
| C | 14.88636336051128 | 35.87381282780080 | 20.46245762349369 |
| H | 14.75511505917673 | 35.11147067370638 | 21.26244764420094 |
| H | 14.76392469990688 | 35.37477801270322 | 19.47504856655699 |
| H | 15.90758899909290 | 36.29344245667224 | 20.52759590362250 |
| O | 11.87869710698757 | 37.44354109318116 | 36.15305613536849 |
| O | 17.25274912712938 | 36.11916463644258 | 36.86601691418710 |
| O | 15.75042504742307 | 39.04623592375813 | 24.79528470701853 |
| O | 10.54432249714078 | 40.01833789103789 | 23.04752161947964 |
| O | 15.75856331002065 | 27.10762628336527 | 20.64493942910820 |
| O | 11.38332644302944 | 23.90583083899567 | 19.35221208395102 |
| O | 14.78138714356189 | 23.16614959179994 | 23.07961526367082 |
| O | 9.30402405628743  | 22.09928727745703 | 23.22778811006214 |
| C | 13.19586257626746 | 37.08281466043918 | 36.34334157666359 |
| C | 14.13313279234190 | 38.14378321231740 | 36.43601913032295 |
| C | 15.48717867096954 | 37.82304659886746 | 36.64579697167389 |
| H | 16.20472763452309 | 38.64881876103621 | 36.68931146500159 |
| C | 15.92403996151540 | 36.48393003901922 | 36.72443471914709 |
| C | 18.22436508968543 | 37.14661356663857 | 37.00393719917152 |
| H | 18.26591918870604 | 37.80356612600134 | 36.10597151677310 |
| H | 18.03132039782920 | 37.78413914057970 | 37.89542523575268 |
| H | 19.20030741567540 | 36.64095896860341 | 37.12503768197656 |
| C | 14.99081596740335 | 35.42563780174711 | 36.61120829552242 |
| C | 13.63219703215602 | 35.74615945017313 | 36.42779632883537 |
| H | 12.91781563155759 | 34.92067221038010 | 36.32076343148592 |
| C | 15.44940876117315 | 33.97193140420623 | 36.53797511663605 |

|   |                   |                   |                   |
|---|-------------------|-------------------|-------------------|
| H | 16.44808355726594 | 33.87659286986169 | 37.00231199347054 |
| H | 14.74615522918836 | 33.32646785943129 | 37.10024938648181 |
| C | 15.48788622903542 | 33.53345831047456 | 35.07821454695919 |
| C | 16.45644552319775 | 34.07121341706166 | 34.19883591628925 |
| H | 17.24523858799646 | 34.71837505759568 | 34.60823791201070 |
| C | 16.39565043115514 | 33.82121708388860 | 32.82081331049142 |
| H | 17.14946539686426 | 34.26121851777818 | 32.15174984531657 |
| C | 15.36639893687164 | 33.01786911108608 | 32.26772080414410 |
| C | 14.42582404479563 | 32.44521755515981 | 33.15715823548371 |
| H | 13.60909214223899 | 31.83389727441230 | 32.76170158383617 |
| C | 14.48693767264469 | 32.70054235384801 | 34.53734876042050 |
| H | 13.71616011741979 | 32.26707809121515 | 35.19151633631456 |
| C | 14.12554110272410 | 28.01113775657181 | 28.00950075873854 |
| C | 14.36863438947198 | 29.22941417063355 | 28.71763154160787 |
| C | 14.27280803787636 | 30.48793497945572 | 28.01383462152296 |
| C | 14.52191859579411 | 31.72507427849739 | 28.71783090464522 |
| C | 14.88853504433007 | 31.69319945386998 | 30.11514032154714 |
| C | 15.02416778776863 | 30.41750423362619 | 30.76419957768023 |
| H | 15.36012818556465 | 30.39114150178223 | 31.80740882167315 |
| C | 14.77648872340734 | 29.24078522058992 | 30.09654444564575 |
| H | 14.92409562996137 | 28.28347377852572 | 30.61069253288725 |
| C | 15.17430973459366 | 32.91872166520132 | 30.79378548324677 |
| C | 14.57673293770581 | 35.56481032327721 | 28.14564760581208 |
| C | 15.55895954227694 | 36.56537722461356 | 28.34381627034062 |
| H | 16.50802679046992 | 36.29787986933075 | 28.83032104939524 |
| C | 15.34996001835063 | 37.88423194763708 | 27.90519814103692 |
| H | 16.14144919476168 | 38.63619394984764 | 28.04213688400734 |
| C | 14.14702732856526 | 38.25760023794825 | 27.27206580371706 |
| C | 13.90857759968555 | 39.67599823828669 | 26.75808655215787 |
| H | 14.82606705243741 | 40.27644934471657 | 26.91403495780282 |

|   |                   |                   |                   |
|---|-------------------|-------------------|-------------------|
| H | 13.09693257145613 | 40.15477039642762 | 27.34469569829605 |
| C | 13.52113928751418 | 39.66771126451997 | 25.28918109799646 |
| C | 14.48041554133121 | 39.28813002367036 | 24.31797385278918 |
| C | 16.71312743694012 | 38.49564019121558 | 23.90668404510796 |
| H | 16.36005821010656 | 37.53932122187177 | 23.46051815515633 |
| H | 16.96811894731973 | 39.19716949818666 | 23.08067421922744 |
| H | 17.61999301911503 | 38.30198939404340 | 24.50887909661691 |
| C | 14.10763846983256 | 39.16301032662621 | 22.96559925887162 |
| H | 14.83077458819289 | 38.84476007640028 | 22.20794766609788 |
| C | 12.78592324643120 | 39.40846632384996 | 22.54597672794337 |
| C | 11.82634216753442 | 39.79311104117800 | 23.51483765078138 |
| C | 9.53311271567846  | 40.36514993482841 | 23.98285642688554 |
| H | 8.59775153191668  | 40.48300149645322 | 23.40440128010836 |
| H | 9.38677922429780  | 39.57163375162484 | 24.74977352798950 |
| H | 9.75751859416461  | 41.32244877138034 | 24.50474423387249 |
| C | 12.20202461588256 | 39.92426916275578 | 24.86936286743819 |
| H | 11.46578147500526 | 40.21230934520116 | 25.62968170742539 |
| C | 13.16389071488389 | 37.26423525073756 | 27.08225678802853 |
| H | 12.21654583135968 | 37.52699189657003 | 26.59088144227222 |
| C | 13.37525793076944 | 35.94694522136047 | 27.50423417725846 |
| H | 12.58312383228105 | 35.20564309564432 | 27.37599423972420 |
| C | 15.15238711740101 | 34.11932826681586 | 30.06248061775023 |
| H | 15.34749564334389 | 35.05555186969442 | 30.59854542816580 |
| C | 14.74507111869828 | 34.19897852353973 | 28.71719811001636 |
| C | 13.66153472858404 | 29.16100039440537 | 24.41947569638646 |
| C | 12.77655171571583 | 28.19109030965648 | 23.88171386650913 |
| H | 12.16125343824199 | 27.58864457737106 | 24.55962239809567 |
| C | 12.66753331988158 | 27.99494031862362 | 22.50033619684551 |
| H | 11.98452259610765 | 27.22187608317187 | 22.12202167568173 |
| C | 13.44394346291721 | 28.74851674492061 | 21.59131510466421 |



|   |                   |                   |                   |
|---|-------------------|-------------------|-------------------|
| C | 13.39708998872549 | 28.42846904253133 | 20.09487147740684 |
| H | 14.21759681312533 | 28.96773273957386 | 19.58290596912470 |
| H | 12.44059145348746 | 28.77920199065881 | 19.65433051393665 |
| C | 13.51697279131876 | 26.92443425957602 | 19.91257382598789 |
| C | 14.70445255772106 | 26.27644208657791 | 20.33352300527234 |
| C | 16.85958393548053 | 26.56656590014978 | 21.36299351282280 |
| H | 17.42275761953692 | 25.81615166995856 | 20.76406021708631 |
| H | 17.52836029055033 | 27.41543960684027 | 21.59680056696297 |
| H | 16.53160507812343 | 26.08908104213085 | 22.31253472485283 |
| C | 14.72998918600976 | 24.87704962425765 | 20.48376558306654 |
| H | 15.61131282108786 | 24.37326174367614 | 20.89332627074245 |
| C | 13.59769967950586 | 24.09115427426765 | 20.19495067661591 |
| C | 12.44549407177110 | 24.72958107199896 | 19.67025162177755 |
| C | 10.14951618605452 | 24.50298087259194 | 18.97879293296432 |
| H | 10.24066857652441 | 25.10085581730574 | 18.04451543010827 |
| H | 9.43998210128885  | 23.67272962917859 | 18.80346876681049 |
| H | 9.74821990944469  | 25.16008990666081 | 19.78243188273710 |
| C | 12.41100966549697 | 26.13491446003573 | 19.54662919039080 |
| H | 11.49734061570377 | 26.64520870901143 | 19.21802509149785 |
| C | 13.54005653668826 | 22.62398434436758 | 20.60913109038852 |
| H | 14.56722506295371 | 22.22951831407310 | 20.71757553174788 |
| H | 13.01271866829953 | 22.02487660832707 | 19.84402174362816 |
| C | 12.79191440629104 | 22.52607358207246 | 21.93718015824489 |
| C | 13.43333096964447 | 22.87592623210328 | 23.15404794293842 |
| C | 15.40919509124172 | 23.73333686561731 | 24.22346351230865 |
| H | 16.44904524281915 | 23.96572482422052 | 23.92735416889065 |
| H | 14.90222333250493 | 24.66920846861480 | 24.54753123379498 |
| H | 15.43141234135132 | 23.02718943079898 | 25.08349817503057 |
| C | 12.69305576603518 | 22.93173485890864 | 24.35063276566131 |
| H | 13.17464075700365 | 23.22193694354999 | 25.29228814221604 |

|   |                   |                   |                   |
|---|-------------------|-------------------|-------------------|
| C | 11.31155350304717 | 22.65953492467807 | 24.37413446829915 |
| C | 10.67010100533201 | 22.31162698892393 | 23.16223346834113 |
| C | 8.61677882643488  | 21.75341215158974 | 22.03324772064141 |
| H | 8.99612854937170  | 20.80337929585115 | 21.59475136239814 |
| H | 7.55370543605741  | 21.62505413183323 | 22.30919075270766 |
| H | 8.69777109580314  | 22.55201471823831 | 21.26172110541287 |
| C | 11.41562493655479 | 22.23145209362319 | 21.96722526391303 |
| H | 10.92737944002291 | 21.99178850148410 | 21.01782839751893 |
| C | 14.32633560071399 | 29.71203139153918 | 22.11903140270942 |
| H | 14.96844321648592 | 30.28539497677956 | 21.43391888806677 |
| C | 14.43441699088767 | 29.91884527868348 | 23.50524506589970 |
| H | 15.16430331477985 | 30.64524015825061 | 23.88598180465497 |
| C | 14.42356486212600 | 32.98872685436478 | 28.02069433923626 |
| C | 14.03061365766953 | 32.96709037563146 | 26.63587296189650 |
| H | 13.92697270962119 | 33.91671803640595 | 26.10015156018493 |
| C | 13.79537636455778 | 31.78895052947305 | 25.96505479814236 |
| H | 13.47037107720613 | 31.82279065403035 | 24.91963829981002 |
| C | 13.95851885824540 | 30.50911446560988 | 26.60230299009782 |
| C | 13.83152161548936 | 29.26999422031055 | 25.89496729634335 |
| C | 14.06425108238315 | 26.67764162435146 | 28.67002170899371 |
| C | 14.71064216469047 | 25.55376205982040 | 28.10056879935311 |
| H | 15.35986080943272 | 25.69713182533117 | 27.22510221011901 |
| C | 14.54701052681999 | 24.26904692519745 | 28.64411971177768 |
| H | 15.07700550340237 | 23.41596014723369 | 28.19372669319897 |
| C | 13.71893994961066 | 24.05348405577029 | 29.76506781742529 |
| C | 13.51464861954601 | 22.65242689918922 | 30.34309179322780 |
| H | 12.54036491729498 | 22.24923315405037 | 29.99377476522433 |
| H | 14.30345356135038 | 21.98554565117374 | 29.94283076524808 |
| C | 13.07826806046934 | 25.17325494866171 | 30.34058632855200 |
| H | 12.43593754898896 | 25.03301293071337 | 31.22128021044288 |

|   |                   |                   |                   |
|---|-------------------|-------------------|-------------------|
| C | 13.24732217260931 | 26.45940692066874 | 29.80823773002791 |
| H | 12.69992924510936 | 27.30499580948909 | 30.24456082875262 |
| C | 13.90167591398836 | 28.06678359325953 | 26.62320317413459 |
| H | 13.76698645570694 | 27.12280121778733 | 26.08212566517594 |
| C | 13.69789924547666 | 39.58302934890831 | 36.16999285008387 |
| H | 14.50791857472495 | 40.26942852874455 | 36.48139685820006 |
| H | 12.79303101211195 | 39.82683924793852 | 36.75861994365931 |
| C | 10.96982887551462 | 36.45079286903791 | 35.68968100792097 |
| H | 11.33985030513791 | 35.96166273358241 | 34.76210947476350 |
| H | 10.77495790625250 | 35.66835856892671 | 36.45680675952568 |
| H | 10.02030489337835 | 36.97361385626373 | 35.46918292129433 |

Optimized structure of **TCNQ**

|   |                   |                   |                   |
|---|-------------------|-------------------|-------------------|
| N | 4.19570018705460  | 2.22920663320875  | 0.00042150659487  |
| N | -4.19581078095057 | 2.22911717204752  | -0.00086394830780 |
| C | -0.68603105045422 | 1.24283846539123  | 0.00000360549350  |
| H | -1.23966862402245 | 2.19136678276040  | 0.00000441483216  |
| N | 4.19578326591366  | -2.22910120792056 | -0.00072707293391 |
| C | 2.84426131009905  | 0.00002774556914  | -0.00007373756154 |
| C | 3.59433316641437  | 1.21885449057918  | -0.00003603647995 |
| C | 0.68601857306936  | -1.24282166747635 | -0.00000317170961 |
| H | 1.23965728098003  | -2.19134930097186 | -0.00000621119161 |
| C | -2.84427391423612 | -0.00000405929080 | 0.00004876629780  |
| C | 0.68600051300365  | 1.24284974663941  | -0.00003059249143 |
| H | 1.23962326111121  | 2.19138652856456  | -0.00004903871561 |
| C | 1.43275324957245  | 0.00001960006770  | -0.00003432426056 |
| C | -0.68601302463045 | -1.24283330964237 | 0.00002540526564  |
| H | -1.23963658747223 | -2.19136916916397 | 0.00004650405232  |
| C | -1.43276508716062 | -0.00000306157171 | 0.00003032482410  |
| N | -4.19561199214218 | -2.22924347098507 | 0.00022904394863  |

|   |                   |                   |                   |
|---|-------------------|-------------------|-------------------|
| C | -3.59435938494929 | 1.21881609397605  | -0.00003921257251 |
| C | 3.59435199138520  | -1.21878734333804 | -0.00018525734253 |
| C | -3.59434535258545 | -1.21883166844322 | 0.00013703225806  |

Optimized structure of **PC-P $\rightarrow$ 2TCNQ**

|   |                   |                   |                   |
|---|-------------------|-------------------|-------------------|
| O | 11.75109078060209 | 36.84083468503945 | 21.68652302622653 |
| O | 6.28051920353210  | 36.84685510566318 | 20.63479899576329 |
| O | 11.27659307984631 | 39.29486954600679 | 31.56096626982262 |
| O | 16.56558144000991 | 37.80541628119322 | 32.48580272159335 |
| O | 7.92822867105769  | 25.98992175214051 | 35.57641111681538 |
| O | 13.41279066822394 | 25.88536302554449 | 36.51991354068969 |
| O | 11.65550584848367 | 23.49784991013624 | 33.27771329066176 |
| O | 17.02764674273464 | 23.08583939958680 | 34.70601428951495 |
| C | 10.41240173418165 | 36.81301168306260 | 21.39755277644577 |
| C | 9.68892285666034  | 38.01021508357844 | 21.64817249123470 |
| C | 8.30909951646914  | 38.02726282757571 | 21.38028938309967 |
| H | 7.75423996832106  | 38.94610977663276 | 21.60444518671178 |
| C | 7.64185378502464  | 36.89547737253019 | 20.86748289292644 |
| C | 5.50737506381481  | 38.01812144037254 | 20.86673764672118 |
| H | 5.54289046975065  | 38.33352680093161 | 21.93332907150498 |
| H | 5.84670004426188  | 38.86896535334803 | 20.23510185892027 |
| H | 4.46527579587457  | 37.76228767627281 | 20.60051904899668 |
| C | 8.36948509124659  | 35.71174936011990 | 20.58745320499883 |
| C | 9.74540875023844  | 35.68405558755095 | 20.87841383871059 |
| H | 10.29587618080050 | 34.75150219082025 | 20.70497509252614 |
| C | 7.66107178516379  | 34.45986228900033 | 20.08109454280863 |
| H | 6.67094129286635  | 34.73909964654336 | 19.67621910443025 |
| H | 8.24791957054200  | 34.00223108381918 | 19.26049016052778 |
| C | 7.51337627537066  | 33.46185057175480 | 21.21899011215390 |
| C | 6.72336944224231  | 33.78219177786576 | 22.34726419506813 |

|   |                   |                   |                   |
|---|-------------------|-------------------|-------------------|
| H | 6.12575659870904  | 34.70478791831250 | 22.33589159241102 |
| C | 6.72652328028066  | 32.96147772828245 | 23.48036767900419 |
| H | 6.10977488561569  | 33.23114836735660 | 24.34821475773222 |
| C | 7.51913282348215  | 31.78379034094588 | 23.52887064528152 |
| C | 8.23254813546663  | 31.41949701670960 | 22.36186961526546 |
| H | 8.83781630429642  | 30.50576939564433 | 22.35546763611766 |
| C | 8.23935984153792  | 32.25445613833508 | 21.23481003858988 |
| H | 8.84897760726107  | 31.97778155419304 | 20.36161785537904 |
| C | 7.62410820622709  | 30.97845718462963 | 24.77113798706366 |
| C | 7.80390130628912  | 31.60053783743499 | 26.05710869582742 |
| C | 7.75544694038719  | 30.79054959759728 | 27.24846245787903 |
| C | 7.95367995395458  | 31.38715181065586 | 28.54861376762053 |
| C | 8.36141221732424  | 32.76814114702086 | 28.64219156472319 |
| C | 8.47031841064130  | 33.52206832948562 | 27.42820236301158 |
| H | 8.84594918091589  | 34.54817150468412 | 27.46799639349720 |
| C | 8.16238189515082  | 32.98028432117365 | 26.19697910169056 |
| H | 8.28667546031649  | 33.59445866873478 | 25.30000168952666 |
| C | 8.78154611087921  | 33.28542523678090 | 29.91858329686139 |
| C | 9.58080116039169  | 34.54219875459491 | 30.01609492451630 |
| C | 9.20236745242409  | 35.77676128944553 | 29.43535801302960 |
| H | 8.18583804678659  | 35.90293390455376 | 29.03854147773494 |
| C | 10.11581783630440 | 36.84174671320473 | 29.35216886526794 |
| H | 9.80644917596599  | 37.79054947773593 | 28.88935565679541 |
| C | 11.43312271634301 | 36.71254196267867 | 29.84024153403003 |
| C | 12.48178110909864 | 37.78886730328078 | 29.59555018908834 |
| H | 11.99079847259939 | 38.67173047266998 | 29.14136916086937 |
| H | 13.20535312524719 | 37.39262028624393 | 28.85562549367475 |
| C | 13.24156034781392 | 38.19552496221840 | 30.84108837391789 |
| C | 12.58311639657994 | 38.95577713462537 | 31.84069400217622 |
| C | 10.52162895221008 | 39.96895706227009 | 32.55887538292730 |

|   |                   |                   |                   |
|---|-------------------|-------------------|-------------------|
| H | 10.45733800149455 | 39.37528277065424 | 33.49782970066430 |
| H | 10.94994201572633 | 40.96754045956860 | 32.80109295949457 |
| H | 9.50512121328339  | 40.10312702907842 | 32.14514522146461 |
| C | 13.26159381144512 | 39.30283002000639 | 33.02397378969326 |
| H | 12.75127654045488 | 39.86131392732322 | 33.81771682977453 |
| C | 14.59588807399168 | 38.90745228357364 | 33.24558473529671 |
| C | 15.25613368768553 | 38.15799782737066 | 32.24223370407535 |
| C | 17.02586899639069 | 36.55476461229190 | 31.97088222877415 |
| H | 17.96529325145401 | 36.32061264876920 | 32.50573148293976 |
| H | 16.28842519575050 | 35.74801914714249 | 32.16701392161332 |
| H | 17.23827135529050 | 36.60454438607454 | 30.87952019937531 |
| C | 14.57367170203715 | 37.80389652577522 | 31.05784428959544 |
| H | 15.08486195625902 | 37.22305067767314 | 30.27889445976293 |
| C | 11.77439246672913 | 35.52750276688598 | 30.52651188927086 |
| H | 12.77178009403733 | 35.42423454594873 | 30.97845187945462 |
| C | 10.86481692614265 | 34.46596686248796 | 30.62083029990363 |
| H | 11.16889443769348 | 33.54959066629883 | 31.14116879860184 |
| C | 8.66725560150092  | 32.46313922028688 | 31.05211068127566 |
| H | 9.03985823462567  | 32.84923860451705 | 32.00768001381622 |
| C | 8.20366252107504  | 31.12968972894482 | 31.00910145657670 |
| C | 8.26510189378224  | 30.34946381120469 | 32.27471285460607 |
| C | 8.83497835349481  | 29.05394677611232 | 32.33150795327484 |
| H | 9.13589330939296  | 28.55136279999462 | 31.40718563203338 |
| C | 9.10845712179593  | 28.42573785012138 | 33.55484051673533 |
| H | 9.61495864343403  | 27.45175210750196 | 33.55396720179721 |
| C | 8.79391635305476  | 29.05364819223049 | 34.77642426273768 |
| C | 9.12109914071204  | 28.43035705972209 | 36.13289431029489 |
| H | 8.16258014684793  | 28.23722458883913 | 36.65915257017338 |
| H | 9.66476831928536  | 29.18409347029680 | 36.73886389101057 |
| C | 9.92714946256459  | 27.14939219647779 | 36.09071306231740 |

|   |                   |                   |                   |
|---|-------------------|-------------------|-------------------|
| C | 9.28440732234639  | 25.91623597755659 | 35.80978071288949 |
| C | 7.23229571374535  | 24.80063322513118 | 35.22757613818005 |
| H | 7.27454967780525  | 24.04038487681898 | 36.03946361411506 |
| H | 6.17911791164287  | 25.09217449388623 | 35.05992026572408 |
| H | 7.63682668201811  | 24.34423115426662 | 34.29655151117133 |
| C | 10.03038713147685 | 24.72051235962883 | 35.77760161054491 |
| H | 9.54771704539540  | 23.76416770549782 | 35.54627175506733 |
| C | 11.41487252154315 | 24.71608445419231 | 36.02157055001108 |
| C | 12.06459114322197 | 25.95138102362624 | 36.28212573373407 |
| C | 14.17502472189122 | 27.09497427407148 | 36.51677254301713 |
| H | 13.91598541663749 | 27.74568004139084 | 37.38187840953989 |
| H | 15.23357806334542 | 26.78775977834698 | 36.60480847835994 |
| H | 14.04282546004928 | 27.66578391003135 | 35.57460955411381 |
| C | 11.31718550823039 | 27.15030982130924 | 36.30414945928325 |
| H | 11.81378087322763 | 28.10875436458352 | 36.49769850839450 |
| C | 12.20419071246292 | 23.41420214812412 | 36.01185446031919 |
| H | 11.49096256065836 | 22.58126213906388 | 35.84848336710513 |
| H | 12.66587343545452 | 23.26021389393716 | 37.00841034194214 |
| C | 13.30673011851390 | 23.34888647552349 | 34.96573617062344 |
| C | 12.99041008728130 | 23.41478083407314 | 33.58439458755613 |
| C | 11.2766689997788  | 23.85676449811899 | 31.94730694409840 |
| H | 10.17428175974242 | 23.94447987382043 | 31.95812460849127 |
| H | 11.71145423538024 | 24.83299603359609 | 31.64988141264607 |
| H | 11.56514884237265 | 23.07328969322280 | 31.21092788163361 |
| C | 14.02429578550943 | 23.37460162261083 | 32.62362895437079 |
| H | 13.78698690995336 | 23.43799698174099 | 31.55473064894608 |
| C | 15.37353362434929 | 23.24847063461524 | 33.00444271381313 |
| C | 15.68623710396064 | 23.18798438800613 | 34.38609041005326 |
| C | 17.39360771975045 | 23.02178353252230 | 36.07901682457662 |
| H | 16.95390075923743 | 22.13297224972317 | 36.58379595169922 |

|   |                   |                   |                   |
|---|-------------------|-------------------|-------------------|
| H | 18.49620545607301 | 22.94363390027035 | 36.10552519735030 |
| H | 17.07960882028241 | 23.93398260662255 | 36.63358798565088 |
| C | 14.65503244014833 | 23.23634583266763 | 35.34483132634124 |
| H | 14.88514693641227 | 23.21478893539686 | 36.41595073805431 |
| C | 8.16875348714232  | 30.32014966833666 | 34.72720868838150 |
| H | 7.89614494406505  | 30.82405414105345 | 35.66737234600250 |
| C | 7.91894043564508  | 30.96068309299288 | 33.50713041724975 |
| H | 7.45574228531591  | 31.95727131109145 | 33.50256584921701 |
| C | 7.84758697825663  | 30.57175796776878 | 29.73652805741299 |
| C | 7.40922944688927  | 29.21255373580657 | 29.58044890089989 |
| H | 7.15805770618277  | 28.62974068388853 | 30.47335564832632 |
| C | 7.32387073257624  | 28.62161125117706 | 28.33537475116646 |
| H | 7.02749527801523  | 27.56874566384405 | 28.25270923327193 |
| C | 7.58706092632469  | 29.36384099130494 | 27.13769841419710 |
| C | 7.67993993341844  | 28.74556373300230 | 25.84173659607844 |
| C | 7.92286918925385  | 27.28970465465441 | 25.67073409878587 |
| C | 8.80799172196309  | 26.60118979178298 | 26.54091002511039 |
| H | 9.23472486349714  | 27.12549876316625 | 27.40236479186078 |
| C | 9.19615887870063  | 25.27968700720795 | 26.28377221133558 |
| H | 9.90919629508866  | 24.78620620777807 | 26.96108415985435 |
| C | 8.71450937589753  | 24.58449785179000 | 25.15510188763712 |
| C | 9.24147423588310  | 23.19660651712155 | 24.81664578166244 |
| H | 9.62812851423740  | 22.71616731450414 | 25.73645103375557 |
| H | 8.42311532794137  | 22.56743954914947 | 24.42020646423144 |
| C | 7.80104437602130  | 25.25021646428054 | 24.30496551273584 |
| H | 7.41643298454377  | 24.72078415315460 | 23.42330949595018 |
| C | 7.41375044606866  | 26.57316443746765 | 24.55689279774220 |
| H | 6.70369924449896  | 27.06601341607580 | 23.87826017076542 |
| C | 7.64012912407657  | 29.57145900857471 | 24.70218844753999 |
| H | 7.65835412918121  | 29.10024428344382 | 23.71196727305787 |



|   |                   |                   |                   |
|---|-------------------|-------------------|-------------------|
| C | 10.37767568055235 | 39.26910607079227 | 22.15731092251097 |
| H | 9.58368996019477  | 39.98178025453438 | 22.46526260779017 |
| H | 10.91214100694298 | 39.74932802662656 | 21.30988107205668 |
| C | 12.45750790578912 | 35.60323633387257 | 21.81750029988039 |
| H | 11.94074629510315 | 34.91713762378485 | 22.52048007229126 |
| H | 12.58562739516692 | 35.09659096544503 | 20.83507379318175 |
| H | 13.45382917490686 | 35.86277343154682 | 22.21989830192468 |
| O | 13.83094073027600 | 36.97529387175728 | 35.25877167959231 |
| O | 19.28962162018694 | 36.84313128968982 | 36.37249211754622 |
| O | 14.90212934669846 | 40.01508896261033 | 24.14183058671366 |
| O | 9.76057460073298  | 37.89504644993793 | 24.53963322063561 |
| O | 17.70583035110743 | 26.33407595823480 | 21.32627551524696 |
| O | 12.25917995043615 | 25.99647746447836 | 20.23671090768599 |
| O | 14.06120088355593 | 23.72849086777571 | 23.54279314337386 |
| O | 8.73259370833696  | 23.02105762142327 | 22.06669111700087 |
| C | 15.16609439749496 | 36.90951992871776 | 35.56385301807006 |
| C | 15.93519291884288 | 38.06255494973429 | 35.25682919441495 |
| C | 17.30824859710735 | 38.05587014926807 | 35.55513438414703 |
| H | 17.89653191382594 | 38.93894943266583 | 35.28009356907992 |
| C | 17.93192160516171 | 36.92563113445058 | 36.12109914457595 |
| C | 20.10131372375254 | 37.97798437798507 | 36.09603645430457 |
| H | 20.08599679952591 | 38.24514954218705 | 35.01576790656036 |
| H | 19.78257934119052 | 38.86736288122494 | 36.68377048346983 |
| H | 21.13225075540297 | 37.70281580994304 | 36.38561856215927 |
| C | 17.16664475702433 | 35.77099880444933 | 36.42239814352461 |
| C | 15.78977514651357 | 35.78015284584086 | 36.13288591911397 |
| H | 15.20816265184105 | 34.87267680485824 | 36.33610531104280 |
| C | 17.84047759122453 | 34.49723896539090 | 36.92085725589715 |
| H | 18.82967127722431 | 34.74689735279457 | 37.34689515169742 |
| H | 17.23063694016972 | 34.03393875070199 | 37.72096660669802 |

|   |                   |                   |                   |
|---|-------------------|-------------------|-------------------|
| C | 17.98588961355677 | 33.52167897337489 | 35.76113648744492 |
| C | 18.79967660038506 | 33.84874056560542 | 34.65116977987991 |
| H | 19.41449323151589 | 34.75901010314634 | 34.69124405615018 |
| C | 18.80145644992376 | 33.04979494860728 | 33.50183926005833 |
| H | 19.43927140733884 | 33.32419213359391 | 32.65070887456211 |
| C | 17.98991892766952 | 31.88722212535877 | 33.41632963430811 |
| C | 17.24342537352008 | 31.51935659842243 | 34.56116752496516 |
| H | 16.61636670539255 | 30.62086144238718 | 34.53715556703717 |
| C | 17.23314252995883 | 32.33199873042143 | 35.70505250561690 |
| H | 16.60001863590183 | 32.05129523757570 | 36.56004262815871 |
| C | 17.90459004339665 | 31.09625814130504 | 32.16164847898978 |
| C | 17.75074499565532 | 31.73295273757113 | 30.88036258090867 |
| C | 17.80206458240290 | 30.93542542034518 | 29.68056175450359 |
| C | 17.63058429529860 | 31.55020489986373 | 28.38545507536889 |
| C | 17.27322918090747 | 32.94561084660794 | 28.30225804849692 |
| C | 17.15079866830359 | 33.68724035388365 | 29.52285591160551 |
| H | 16.79973599360828 | 34.72263012649599 | 29.48546911049421 |
| C | 17.41624290634197 | 33.12023367802664 | 30.75192024914588 |
| H | 17.28464740256280 | 33.71904671751364 | 31.65720617248165 |
| C | 16.92542901372250 | 33.50141439100079 | 27.02449749931258 |
| C | 16.31290895174421 | 34.85327425681053 | 26.88023514198644 |
| C | 16.86643887652071 | 36.03238386808438 | 27.44069280861036 |
| H | 17.83430284842046 | 35.98568572242002 | 27.95834257233763 |
| C | 16.21236314785287 | 37.26790301299352 | 27.31126492911748 |
| H | 16.66657435601192 | 38.16784093179474 | 27.75306745423388 |
| C | 14.98692199186923 | 37.38374081654475 | 26.61372164077855 |
| C | 14.27941719721870 | 38.73852770441791 | 26.53811769996996 |
| H | 15.04447614694134 | 39.53017587224323 | 26.44012979557694 |
| H | 13.77489336690121 | 38.91536026013890 | 27.50970781278221 |
| C | 13.26031677932309 | 38.87760636587046 | 25.42501743418746 |

|   |                   |                   |                   |
|---|-------------------|-------------------|-------------------|
| C | 13.61264798782834 | 39.53195873536315 | 24.21836105141432 |
| C | 15.31820272347270 | 40.65875178479649 | 22.94542007400038 |
| H | 15.24619138029166 | 39.98234232973611 | 22.06451527528534 |
| H | 14.72167050224166 | 41.57514205821083 | 22.73530913625038 |
| H | 16.37571211078562 | 40.94485086240769 | 23.09538934360880 |
| C | 12.66499468590098 | 39.65645667976844 | 23.18210196880089 |
| H | 12.92870059071221 | 40.15855411628754 | 22.24370032762015 |
| C | 11.37395986359057 | 39.11163157580928 | 23.29588290894605 |
| C | 11.02839065777144 | 38.42922285896894 | 24.48842194753077 |
| C | 9.52490507324701  | 36.78043946086844 | 25.40270813095489 |
| H | 8.51273756073488  | 36.40892644752354 | 25.15659011739900 |
| H | 10.25680187460351 | 35.96491177092512 | 25.22171923705818 |
| H | 9.55182752211473  | 37.06514053743110 | 26.47707079794484 |
| C | 11.96570427419383 | 38.32966711047271 | 25.53873848592891 |
| H | 11.69130355936431 | 37.81773635787753 | 26.46985296642648 |
| C | 14.45214258443654 | 36.21601927930137 | 26.02959407052522 |
| H | 13.51427770736482 | 36.27095249700935 | 25.46245391605673 |
| C | 15.09977277024574 | 34.97700673843701 | 26.15719837998505 |
| H | 14.64715265286409 | 34.08875769854462 | 25.69621701318340 |
| C | 17.00813050473833 | 32.68283389017351 | 25.88486362511115 |
| H | 16.68714202460121 | 33.10458511277587 | 24.92587389995971 |
| C | 17.40336357905724 | 31.32799961580184 | 25.91873653965254 |
| C | 17.32889470102302 | 30.56665770360218 | 24.64138658331861 |
| C | 16.73530017932248 | 29.28328071641235 | 24.56474550705650 |
| H | 16.42714855648167 | 28.77188697825612 | 25.48107274492241 |
| C | 16.44816618781983 | 28.67787085684652 | 23.33276838057915 |
| H | 15.92211237371194 | 27.71440248878379 | 23.32119412338769 |
| C | 16.77544947986075 | 29.31552984088012 | 22.12006123358250 |
| C | 16.42767395528726 | 28.72331476082256 | 20.75448496731631 |
| H | 17.37583534292688 | 28.58643968781477 | 20.19250456230418 |

|   |                   |                   |                   |
|---|-------------------|-------------------|-------------------|
| H | 15.83676244533980 | 29.47476601751274 | 20.19100972700847 |
| C | 15.67189707514767 | 27.41140253987245 | 20.77469974841822 |
| C | 16.35926254878222 | 26.20442874720170 | 21.06615756874470 |
| C | 18.44180256742303 | 25.17540894082977 | 21.69623069837037 |
| H | 18.44542802123670 | 24.40987490458343 | 20.88838765392955 |
| H | 19.47895417195778 | 25.50973236409495 | 21.88256081588244 |
| H | 18.03696907759208 | 24.70873249527051 | 22.62198104243979 |
| C | 15.66295830169043 | 24.97902095205537 | 21.08285952982554 |
| H | 16.17852883990910 | 24.04390130397473 | 21.32933572520827 |
| C | 14.28670951885929 | 24.91727155500981 | 20.80368088318165 |
| C | 13.59388535294455 | 26.12345445195674 | 20.52012027315394 |
| C | 11.44574833124596 | 27.17142465586976 | 20.19174638730885 |
| H | 11.72731760792353 | 27.83349780624965 | 19.34248363161869 |
| H | 10.40935413312866 | 26.81718432161444 | 20.03954545109018 |
| H | 11.49521924110120 | 27.74370077615569 | 21.14088155823654 |
| C | 14.28954641718385 | 27.35396764794755 | 20.52241789168573 |
| H | 13.75739162393841 | 28.29073812242208 | 20.31762999894588 |
| C | 13.54800798952613 | 23.58630534681511 | 20.80428002479303 |
| H | 14.29076897552979 | 22.78128036544023 | 20.97635654039765 |
| H | 13.10352838039037 | 23.41422091039551 | 19.80303423144310 |
| C | 12.43762436900760 | 23.47822871346856 | 21.83934129723690 |
| C | 12.73563339445598 | 23.57142058357555 | 23.22297910853572 |
| C | 14.40350468147597 | 24.18291140020912 | 24.85355384207988 |
| H | 15.49828204362417 | 24.33988690961421 | 24.84514582935604 |
| H | 13.90573155369020 | 25.14487041310167 | 25.09346819923363 |
| H | 14.15825739952055 | 23.42571222236489 | 25.63186948770650 |
| C | 11.69688968506879 | 23.47863154429177 | 24.17432077592128 |
| H | 11.92115542284038 | 23.55765284702125 | 25.24516531015949 |
| C | 10.36063984164737 | 23.27249566344977 | 23.78227552958751 |
| C | 10.06426560745727 | 23.19347992470327 | 22.39806259742116 |

|   |                   |                   |                   |
|---|-------------------|-------------------|-------------------|
| C | 8.38344617385014  | 22.92267009545906 | 20.69150371609098 |
| H | 8.87557855416499  | 22.05408430284416 | 20.19997663041540 |
| H | 7.28703667358954  | 22.78403546703312 | 20.65653243550538 |
| H | 8.65147939721520  | 23.84481845712459 | 20.12912841215275 |
| C | 11.10045549440770 | 23.29295272058593 | 21.44818077025177 |
| H | 10.88226899862455 | 23.25298073340242 | 20.37503970975843 |
| C | 17.43014147718329 | 30.56633112438453 | 22.18787726078893 |
| H | 17.71691465345482 | 31.07631660100810 | 21.25521164588344 |
| C | 17.69213108010137 | 31.18493781557977 | 23.41682974138806 |
| H | 18.17991824979533 | 32.16944030643050 | 23.43372114135709 |
| C | 17.72722131484568 | 30.74562916480621 | 27.18886436325142 |
| C | 18.13177168451849 | 29.37459716467094 | 27.33360074531113 |
| H | 18.37378669795039 | 28.79523877135773 | 26.43597684032335 |
| C | 18.20577987485629 | 28.77101093804098 | 28.57256951580528 |
| H | 18.48432150808260 | 27.71271509672183 | 28.64539733112299 |
| C | 17.95292149022930 | 29.50603951898832 | 29.77723308901209 |
| C | 17.85883268389953 | 28.87578567598710 | 31.06606789769969 |
| C | 17.63873194080965 | 27.41412397650539 | 31.21603088225051 |
| C | 16.73981926410546 | 26.73030443960554 | 30.35652569056030 |
| H | 16.27385590706293 | 27.26980361654733 | 29.52482065763373 |
| C | 16.40052536437705 | 25.38979541375677 | 30.58172635649058 |
| H | 15.67708838143961 | 24.89711560771829 | 29.91516579248648 |
| C | 16.94992440046540 | 24.67060108841633 | 31.66377011281511 |
| C | 16.48753933878833 | 23.25026475028340 | 31.96272063992123 |
| H | 16.11582291104493 | 22.78089619329026 | 31.03114909967958 |
| H | 17.33648846624911 | 22.64733277360825 | 32.33495293494029 |
| C | 17.87012732229754 | 25.33651172515740 | 32.50597353468262 |
| H | 18.30409603402095 | 24.78980515573308 | 33.35322128789339 |
| C | 18.20560350269464 | 26.68003610936103 | 32.28862193588643 |
| H | 18.92557518736270 | 27.17309620173289 | 32.95675401479243 |

|   |                   |                   |                   |
|---|-------------------|-------------------|-------------------|
| C | 17.88810655923461 | 29.68824348432163 | 32.21546451455687 |
| H | 17.86435639590074 | 29.20481875943393 | 33.19988134285708 |
| C | 15.29589480780607 | 39.25183888053710 | 34.55553872241492 |
| H | 16.08741399898188 | 40.00737168836130 | 34.36983708252186 |
| H | 14.54987479620210 | 39.72677613739020 | 35.22539995070861 |
| C | 13.09155147715684 | 35.75605763090542 | 35.14703411822396 |
| H | 13.59770193718251 | 35.04129927708076 | 34.46540601319057 |
| H | 12.93460349694055 | 35.27568398768188 | 36.13862305035735 |
| H | 12.10852156535065 | 36.03192106535244 | 34.72316579420217 |
| N | 11.60435229108094 | 31.53252615580258 | 32.28947490763349 |
| N | 10.72845371473094 | 33.50091437896712 | 24.08691119665001 |
| C | 11.13436111236013 | 31.74825088860545 | 27.23543391392375 |
| H | 11.17582056802385 | 32.79313513981599 | 26.90884775757025 |
| N | 11.75177703658484 | 27.25879572516531 | 31.08426270976074 |
| C | 11.44829937508036 | 29.75275129503897 | 30.40442020856131 |
| C | 11.52157033680770 | 30.73108622860703 | 31.43094975336064 |
| C | 11.12417805547360 | 29.04377069775217 | 28.04022483271802 |
| H | 11.13808711783909 | 27.99564558016757 | 28.36333231056480 |
| C | 10.88578473748062 | 31.02518229307397 | 24.86254731969763 |
| C | 11.25241659396818 | 31.44419800053415 | 28.57384454491580 |
| H | 11.37645142554816 | 32.25124039787132 | 29.30223146277340 |
| C | 11.26182951945007 | 30.07843869581275 | 29.02962788311019 |
| C | 10.98024091135046 | 29.34646211827405 | 26.70359985596862 |
| H | 10.87308013442858 | 28.53915665378606 | 25.96977322705578 |
| C | 10.99292870761530 | 30.71308115132335 | 26.24914254494235 |
| N | 10.89992044709889 | 29.16237208245807 | 23.04902533313192 |
| C | 10.82318472228653 | 32.37399735035756 | 24.41369300088181 |
| C | 11.61218847512500 | 28.39227696157420 | 30.80252953175892 |
| C | 10.89340083490768 | 30.00376882723466 | 23.87132394894047 |
| N | 14.72622826084167 | 33.63699994605051 | 32.77834467204628 |

|   |                   |                   |                   |
|---|-------------------|-------------------|-------------------|
| N | 13.99194119399711 | 31.97217675774293 | 24.62438330366994 |
| C | 14.32386796672655 | 31.69763717919559 | 28.27057242127850 |
| H | 14.20169580152599 | 32.52357789403975 | 27.56114737766663 |
| N | 14.62391674621740 | 29.24764440354289 | 33.71881596393219 |
| C | 14.64978573449185 | 31.16904717716410 | 31.96673450868126 |
| C | 14.67492780320782 | 32.50924667037437 | 32.44543403657758 |
| C | 14.59068069907271 | 29.54348948862786 | 30.07696471958347 |
| H | 14.69287360383591 | 28.71655106598991 | 30.78991348129438 |
| C | 14.12322485715634 | 30.06932686692501 | 26.38945853457632 |
| C | 14.43417245143796 | 31.96205858696219 | 29.61670330093507 |
| H | 14.39653342729247 | 32.99711494920567 | 29.97312488793343 |
| C | 14.56977249716205 | 30.89604662396927 | 30.57264238398971 |
| C | 14.46269282279730 | 29.28018634481176 | 28.72998001232962 |
| H | 14.45601267002615 | 28.24265739301694 | 28.37402682029828 |
| C | 14.31635929386304 | 30.34438943675015 | 27.77389980239542 |
| N | 13.81180259673444 | 27.59192246626397 | 25.66072986013826 |
| C | 14.05717308176918 | 31.10176209729736 | 25.41415518782020 |
| C | 14.63699307937074 | 30.11854040806848 | 32.92837521161811 |
| C | 13.95534020425052 | 28.72363719423791 | 25.94804657738081 |

Optimized structure of **PC-O<sub>2</sub>TCNQ**

|   |                   |                   |                   |
|---|-------------------|-------------------|-------------------|
| O | 14.07627394140471 | 36.43365576067691 | 21.65388930886071 |
| O | 8.73233729283100  | 35.94697418777449 | 20.12956510354679 |
| O | 10.47861391761109 | 38.70544400568446 | 32.34877388438208 |
| O | 15.76254077151151 | 37.92766845368400 | 33.92424008118029 |
| O | 9.20121158292662  | 25.85912459769728 | 36.75097331496450 |
| O | 13.62394381417767 | 29.24774624864767 | 36.55382965907506 |
| O | 13.53529505351830 | 23.95305207880892 | 36.13551301513718 |
| O | 17.33337230529177 | 26.85989782656378 | 33.28002594880089 |
| C | 12.76450590604479 | 36.26923763039377 | 21.26749840569462 |

|   |                   |                   |                   |
|---|-------------------|-------------------|-------------------|
| C | 11.95867470176890 | 37.43552922790175 | 21.29987963673151 |
| C | 10.60734124896604 | 37.32859632310151 | 20.92883861374046 |
| H | 9.98927496369931  | 38.23115919846269 | 20.98971342067508 |
| C | 10.05856777916598 | 36.10495255885063 | 20.49741049367804 |
| C | 7.88841447422356  | 37.09095882809621 | 20.13254806675408 |
| H | 7.79437612699655  | 37.53487114925351 | 21.14895660148931 |
| H | 8.25560221603165  | 37.87872293234880 | 19.43749526265704 |
| H | 6.89312659472488  | 36.74633700774855 | 19.79582113867631 |
| C | 10.87274362803914 | 34.94901253832857 | 20.42096313149387 |
| C | 12.21779996361507 | 35.04414357181059 | 20.82977374554346 |
| H | 12.83211927574212 | 34.13624689982732 | 20.80208012242247 |
| C | 10.29578083067302 | 33.62377737482053 | 19.93627176497640 |
| H | 9.44941972660367  | 33.83443096306761 | 19.25379845035895 |
| H | 11.06631805035639 | 33.07778175050561 | 19.35802728899618 |
| C | 9.81906612440897  | 32.74482230345239 | 21.08545796438469 |
| C | 8.79919710395876  | 33.19016375964966 | 21.95749132253300 |
| H | 8.30647628432753  | 34.15047199345704 | 21.75612788129327 |
| C | 8.43423184709711  | 32.43293853004582 | 23.07795781010123 |
| H | 7.64862860239055  | 32.80123393041386 | 23.75276718792454 |
| C | 9.07179688402085  | 31.20012356882881 | 23.36402157719793 |
| C | 10.05340303545385 | 30.73099031563612 | 22.46176202032257 |
| H | 10.58487782385289 | 29.79779381981350 | 22.68331014394354 |
| C | 10.42258930324436 | 31.49792306869436 | 21.34591689742561 |
| H | 11.22338428409013 | 31.13897374412322 | 20.68420085842858 |
| C | 8.77571301963773  | 30.44912809110054 | 24.61190769880666 |
| C | 8.90935211183549  | 31.07638317105908 | 25.89657453748980 |
| C | 8.60805797855303  | 30.32943355914238 | 27.09204976985280 |
| C | 8.74034867415090  | 30.95123959333603 | 28.38875702101306 |
| C | 9.26038760516320  | 32.29664473495976 | 28.48369531310592 |
| C | 9.64935138275604  | 32.96111810358940 | 27.27246649643851 |



|   |                   |                   |                   |
|---|-------------------|-------------------|-------------------|
| H | 10.12554085940315 | 33.94177942865415 | 27.32944268643582 |
| C | 9.45700759512577  | 32.39128458831121 | 26.03454261506492 |
| H | 9.77637658693941  | 32.93173040153559 | 25.13836979903797 |
| C | 9.44106811408847  | 32.88921486460283 | 29.78038401322998 |
| C | 10.05214366303860 | 34.23093358877669 | 29.97553654494579 |
| C | 9.72452953704684  | 35.35760120652394 | 29.17842842071878 |
| H | 8.90751225700752  | 35.28895148211285 | 28.44917079331187 |
| C | 10.41906752508508 | 36.56883877436389 | 29.31808374336973 |
| H | 10.15183188745190 | 37.42249296884376 | 28.67669632549530 |
| C | 11.45016710785984 | 36.71236595815370 | 30.27094247018902 |
| C | 12.26345710900081 | 38.00147175438427 | 30.37205965104533 |
| H | 11.64922545676691 | 38.84301205726641 | 29.99407136430067 |
| H | 13.14848280350027 | 37.91342003770546 | 29.70835338457844 |
| C | 12.72988031043582 | 38.25199101839889 | 31.79003673579849 |
| C | 11.76905286214537 | 38.52553914632094 | 32.79748610863563 |
| C | 9.43384778443479  | 38.80276297076651 | 33.30728132590558 |
| H | 9.38283118984734  | 37.89812981836282 | 33.95338139730244 |
| H | 9.54931098110452  | 39.69701149656841 | 33.96002177537987 |
| H | 8.49175525794435  | 38.89333300099653 | 32.73563164761150 |
| C | 12.14978029591153 | 38.53694275525075 | 34.15175360095547 |
| H | 11.40136703527256 | 38.67612310462708 | 34.94104137096190 |
| C | 13.48586641831541 | 38.30369958549009 | 34.53739358622812 |
| C | 14.45422765909630 | 38.09985766563665 | 33.52594181129532 |
| C | 16.52840096384878 | 36.92210392264082 | 33.25697058671011 |
| H | 17.40580331583741 | 36.72477786283643 | 33.89745779078047 |
| H | 15.95020593181823 | 35.98136091613931 | 33.14136834919418 |
| H | 16.88315223170257 | 37.25697693824032 | 32.25615309481793 |
| C | 14.06546585051847 | 38.05158878811136 | 32.17020225120227 |
| H | 14.80678169577148 | 37.82631511361939 | 31.39221000758988 |
| C | 11.71967378572133 | 35.62009071207356 | 31.12482692085780 |

|   |                   |                   |                   |
|---|-------------------|-------------------|-------------------|
| H | 12.49953308427243 | 35.70321548275523 | 31.89218753724342 |
| C | 11.03657076941515 | 34.40534358455001 | 30.98061645176821 |
| H | 11.31918197351707 | 33.55920548104485 | 31.62161097959966 |
| C | 9.13021023214632  | 32.12405433223864 | 30.91605109247886 |
| H | 9.32533442828283  | 32.56306411395336 | 31.90045259407150 |
| C | 8.62766450950573  | 30.80613164018467 | 30.86672161717886 |
| C | 8.42855882586960  | 30.12817888735220 | 32.17624519786045 |
| C | 8.84883323597801  | 28.79647112111479 | 32.43394712239287 |
| H | 9.23202982901926  | 28.17886873299268 | 31.61467605180830 |
| C | 8.87192392257508  | 28.28393123365382 | 33.74023473092183 |
| H | 9.25823484280370  | 27.27138473036656 | 33.91922630069858 |
| C | 8.48798222931719  | 29.07881715960044 | 34.84112442997345 |
| C | 8.66518182903291  | 28.57145863090339 | 36.26427221598345 |
| H | 7.94981053223180  | 27.75249385840401 | 36.46816291854466 |
| H | 8.43087071935260  | 29.39297156674141 | 36.97144498228311 |
| C | 10.07730011755199 | 28.05808411226424 | 36.51374661257248 |
| C | 10.30868109946918 | 26.68320127391025 | 36.75942937771371 |
| C | 9.40121608506836  | 24.45785409758022 | 36.88910532564118 |
| H | 9.83675135166759  | 24.19530795856167 | 37.87900064847802 |
| H | 8.40356278215911  | 23.98944536162427 | 36.79927541873450 |
| H | 10.06853719146754 | 24.05890293244750 | 36.09345301445184 |
| C | 11.61799091630963 | 26.21689589498355 | 36.98284178247833 |
| H | 11.81371474807624 | 25.15809109190030 | 37.16789208146911 |
| C | 12.72459855615369 | 27.07719451346326 | 36.91933509848505 |
| C | 12.50165648726494 | 28.45066521951061 | 36.63466319909728 |
| C | 13.45622981422357 | 30.66456868466116 | 36.48639826273644 |
| H | 12.84466781435587 | 31.04335468740112 | 37.33469087929879 |
| H | 14.47037457384305 | 31.09838342098442 | 36.55631125910324 |
| H | 12.98931021989191 | 30.98666211098474 | 35.53252211741586 |
| C | 11.18556707317718 | 28.92664178145939 | 36.45080621056432 |

|   |                   |                   |                   |
|---|-------------------|-------------------|-------------------|
| H | 11.00363191285928 | 29.98281851935820 | 36.21887528373821 |
| C | 14.13294521721238 | 26.52993639219000 | 37.10932396084522 |
| H | 14.09448976114828 | 25.72299447840510 | 37.86658257540956 |
| H | 14.78213864934847 | 27.33395459574395 | 37.49926481724857 |
| C | 14.76530776795279 | 25.96819483094742 | 35.83946326935698 |
| C | 14.44688288037969 | 24.66469993850968 | 35.38182271778124 |
| C | 13.08420783466776 | 22.69581675682342 | 35.65088518206467 |
| H | 12.32227573443724 | 22.33912735001627 | 36.36901753143243 |
| H | 12.62119114523718 | 22.78717693005921 | 34.64374817680766 |
| H | 13.90677896923891 | 21.94774288372891 | 35.59962057381889 |
| C | 15.07156741168155 | 24.14665208209490 | 34.22926631952269 |
| H | 14.82797355427468 | 23.13900227698881 | 33.87147010953456 |
| C | 16.03969810440325 | 24.88123375608161 | 33.51917906633046 |
| C | 16.35509648138853 | 26.18938489827316 | 33.97454536168834 |
| C | 17.52777433909068 | 28.24532561658345 | 33.55367142075034 |
| H | 17.83247392383771 | 28.42608868381047 | 34.60753623685424 |
| H | 18.34268818452725 | 28.57798840937033 | 32.88805619427038 |
| H | 16.61124232931064 | 28.82796861645002 | 33.32576308743354 |
| C | 15.69708102836451 | 26.72202884289499 | 35.10463398239547 |
| H | 15.91160837341275 | 27.73993063296053 | 35.44865262543875 |
| C | 7.99867852681741  | 30.37580656299847 | 34.58322286375979 |
| H | 7.66367550030981  | 31.00437780491430 | 35.42202737006438 |
| C | 7.96271598062175  | 30.88715460266625 | 33.28026024659624 |
| H | 7.59026780768536  | 31.90655074758185 | 33.11249131005779 |
| C | 8.40693252429611  | 30.20572485754014 | 29.58142761325643 |
| C | 7.86778511406704  | 28.88431176668772 | 29.42285606028300 |
| H | 7.49304456912849  | 28.35513075295214 | 30.30593620305072 |
| C | 7.80849899036830  | 28.26815799955817 | 28.18882531933895 |
| H | 7.40317522391366  | 27.25216298871525 | 28.10818741167448 |
| C | 8.22592544499831  | 28.94282406113493 | 26.99289984150696 |

|   |                   |                   |                   |
|---|-------------------|-------------------|-------------------|
| C | 8.23858690002363  | 28.29958241874349 | 25.70932628727846 |
| C | 8.09207579368228  | 26.83190442651097 | 25.53301693199138 |
| C | 8.84931199005807  | 25.92576379430050 | 26.31447375725170 |
| H | 9.45008573486452  | 26.30729155068467 | 27.14934844820359 |
| C | 8.92428082696579  | 24.56665515764518 | 25.97208395511944 |
| H | 9.58707143609934  | 23.90346826288106 | 26.54666171584953 |
| C | 8.22804073399451  | 24.05892944734503 | 24.85710860962469 |
| C | 8.50533121521863  | 22.65792143384521 | 24.32096348251564 |
| H | 9.06317241517666  | 22.06977659991290 | 25.07481930926288 |
| H | 7.56161772170858  | 22.12816612537656 | 24.09404466004725 |
| C | 7.39056354529735  | 24.94263697089884 | 24.13468916112552 |
| H | 6.82538794489489  | 24.55393323701024 | 23.27761388046140 |
| C | 7.33201355852625  | 26.30252289669187 | 24.45836004164590 |
| H | 6.70451068942150  | 26.97927755190555 | 23.86135165804514 |
| C | 8.47236731022638  | 29.08009305635701 | 24.55764448913700 |
| H | 8.46852055339541  | 28.58796049716417 | 23.57750719775881 |
| C | 12.55463731799218 | 38.78557033484365 | 21.67442903812637 |
| H | 11.79585879352847 | 39.56399129270935 | 21.45728933804236 |
| H | 13.42687246801782 | 38.98315871090380 | 21.01938249903801 |
| C | 14.94498542115575 | 35.30587855208566 | 21.61698879671011 |
| H | 14.57607973986314 | 34.46871151532245 | 22.24600631503624 |
| H | 15.08190256379041 | 34.92481659913762 | 20.57986921558168 |
| H | 15.91993584322042 | 35.65387495850280 | 22.00641054225301 |
| O | 12.81194210163793 | 35.62172869156228 | 35.60491350801492 |
| O | 18.07389690591929 | 35.92030086620546 | 37.42850409395790 |
| O | 16.11751955900834 | 39.43822009540965 | 25.13445736078832 |
| O | 10.75501178482498 | 38.75372207626682 | 23.80454451599399 |
| O | 15.45691553459774 | 27.24200789084003 | 19.89405394492517 |
| O | 9.97705097251768  | 26.28783240528463 | 20.21837350523992 |
| O | 12.83213788510430 | 23.55969539526747 | 21.97148060660003 |

|   |                   |                   |                   |
|---|-------------------|-------------------|-------------------|
| O | 7.32800818117662  | 22.69772257884281 | 21.76808948175319 |
| C | 14.10071545459844 | 35.65227711176743 | 36.07322506593197 |
| C | 14.63977202322440 | 36.93727689221212 | 36.35140453304463 |
| C | 15.95024484854761 | 37.02417714658442 | 36.85057767865722 |
| H | 16.36341186921587 | 38.02366608884573 | 37.02748722530424 |
| C | 16.75072896087900 | 35.87798030210566 | 37.02567894883121 |
| C | 18.64008182074236 | 37.18090941625789 | 37.76557200855417 |
| H | 18.65212022143829 | 37.87651802159269 | 36.89693056981054 |
| H | 18.09161238480934 | 37.67010079298459 | 38.60088625635837 |
| H | 19.68028248981500 | 36.98146439417522 | 38.08277180675447 |
| C | 16.22704659639223 | 34.59794330594731 | 36.71866022042197 |
| C | 14.90144930641943 | 34.50467700108891 | 36.25313686994243 |
| H | 14.51496581098192 | 33.51785786364704 | 35.97433778439543 |
| C | 17.14082880316042 | 33.37444244051689 | 36.69332109103014 |
| H | 18.04692576967867 | 33.57257617185682 | 37.29343751313115 |
| H | 16.62574871721149 | 32.49427854024066 | 37.12545108776232 |
| C | 17.48388303026076 | 33.10831345870117 | 35.23374667946392 |
| C | 18.25675407951807 | 34.03953348751893 | 34.50103705762442 |
| H | 18.74895590031830 | 34.86064328647428 | 35.04083386344819 |
| C | 18.34229649120146 | 33.96444325136540 | 33.10431239606149 |
| H | 18.91866786516658 | 34.71928261631634 | 32.55031878971190 |
| C | 17.67527169546193 | 32.94036657050395 | 32.38657949245214 |
| C | 16.97539158972591 | 31.96126871253997 | 33.13519405022530 |
| H | 16.43782383932520 | 31.16065985788885 | 32.61922177828994 |
| C | 16.87896548905665 | 32.04858948667995 | 34.52957249945234 |
| H | 16.27416958143031 | 31.30708691434201 | 35.07112466556742 |
| C | 17.03853137882403 | 28.13773142617099 | 28.01761931521661 |
| C | 17.46463372663661 | 29.34495749368114 | 28.65330664968575 |
| C | 17.32662370860679 | 30.59715551169474 | 27.95848896020390 |
| C | 17.42113851395731 | 31.82932761207624 | 28.70353430162803 |

|   |                   |                   |                   |
|---|-------------------|-------------------|-------------------|
| C | 17.72754901712108 | 31.78070850658169 | 30.11098909419621 |
| C | 18.12164358155995 | 30.52959430369424 | 30.68843176353497 |
| H | 18.50035061795253 | 30.51985806342548 | 31.71522560315633 |
| C | 17.95327999946523 | 29.34922286304959 | 30.00401006673838 |
| H | 18.15937724253546 | 28.39198990394554 | 30.49449455753909 |
| C | 17.58835633898514 | 32.96694202760597 | 30.90190817109342 |
| C | 16.41192137750757 | 35.55762598821386 | 28.37280898675499 |
| C | 16.73759949124494 | 36.79435669483117 | 28.99471223832981 |
| H | 17.51949995144082 | 36.82252333989670 | 29.76587936545732 |
| C | 16.09482971680865 | 37.98759604795910 | 28.63131926387936 |
| H | 16.38253421388416 | 38.92790308651050 | 29.12524832618793 |
| C | 15.09036752712154 | 38.00539158692044 | 27.63646849254422 |
| C | 14.36181128474444 | 39.29149430590498 | 27.24767020267432 |
| H | 15.04937310871596 | 40.14724625245407 | 27.39915291156396 |
| H | 13.50247372455074 | 39.44533593935958 | 27.93392330650099 |
| C | 13.86051400033250 | 39.25183317045084 | 25.81785589971199 |
| C | 14.80138377572224 | 39.27852998705690 | 24.75779432887704 |
| C | 17.12555689522458 | 39.33116866834352 | 24.13842640211843 |
| H | 17.09170503609441 | 38.34482480656546 | 23.62382441934292 |
| H | 17.04090096888661 | 40.13235030855047 | 23.37030537692832 |
| H | 18.09439124661988 | 39.43437856212883 | 24.66111062333793 |
| C | 14.37020491554738 | 39.11637555030198 | 23.42699996357455 |
| H | 15.08907152671327 | 39.10990355328686 | 22.59995977073263 |
| C | 13.01100100075366 | 38.93338214398012 | 23.11766194663553 |
| C | 12.06660393541019 | 38.90827806262606 | 24.17554091199952 |
| C | 9.78274206752404  | 38.51314597477259 | 24.81873078690988 |
| H | 8.82555840855619  | 38.34038352997214 | 24.29250881840825 |
| H | 10.04265130694100 | 37.60940813699268 | 25.40592394174110 |
| H | 9.66831130488682  | 39.38854457879987 | 25.49712935201940 |
| C | 12.50131146062611 | 39.05944317422794 | 25.51192905393513 |

|   |                   |                   |                   |
|---|-------------------|-------------------|-------------------|
| H | 11.78337608302231 | 39.01302840726306 | 26.33961121965634 |
| C | 14.77849916504677 | 36.78707614860522 | 27.00028127217861 |
| H | 14.00938625902105 | 36.76679492000595 | 26.21707220033067 |
| C | 15.42870939222131 | 35.59966816729501 | 27.35251247443338 |
| H | 15.12968406417385 | 34.67908069303294 | 26.85334921361979 |
| C | 17.20866976740526 | 34.16425432864541 | 30.26586457476665 |
| H | 16.98936647183017 | 35.02815550167069 | 30.90293822615779 |
| C | 16.96408948215750 | 34.27039425560716 | 28.87804046850617 |
| C | 15.99022865077433 | 29.33137295774544 | 24.56492209324507 |
| C | 14.74723827849257 | 28.67305721786966 | 24.39318127808001 |
| H | 14.27642811252110 | 28.19335649055191 | 25.25981035939669 |
| C | 14.09341586081725 | 28.66301310695632 | 23.15642285214734 |
| H | 13.11887926397499 | 28.16528319434632 | 23.06240679010737 |
| C | 14.66257700850431 | 29.30133268859283 | 22.03558797850700 |
| C | 13.90166774773365 | 29.36176925053317 | 20.71737495038781 |
| H | 14.59076132381528 | 29.70104103985427 | 19.91945218229950 |
| H | 13.11392866377970 | 30.13472091943083 | 20.82206719083367 |
| C | 13.27386885061142 | 28.03333575828811 | 20.34201938243605 |
| C | 14.10993978261447 | 26.95535196447107 | 19.95188576755086 |
| C | 16.36770992531084 | 26.17837038851662 | 19.65415440560621 |
| H | 16.21883131206540 | 25.71899519819228 | 18.65107877571262 |
| H | 17.38152922519550 | 26.61721417077536 | 19.70257426995424 |
| H | 16.27931372295827 | 25.37950623432431 | 20.42410434578011 |
| C | 13.55462526687597 | 25.69194625090338 | 19.67369070609151 |
| H | 14.19754934746694 | 24.84449281707862 | 19.40892680874767 |
| C | 12.16766909314877 | 25.46268129743878 | 19.77168948708408 |
| C | 11.33127358876889 | 26.54066575567562 | 20.14927503975371 |
| C | 9.21895940930618  | 26.97800404147452 | 21.21166989029966 |
| H | 9.02597970932844  | 28.03972719438950 | 20.94082595556045 |
| H | 8.25328882220666  | 26.44597366438402 | 21.29691468114629 |

|   |                   |                   |                   |
|---|-------------------|-------------------|-------------------|
| H | 9.72791638935553  | 26.94560532686685 | 22.19917723353456 |
| C | 11.88999267148379 | 27.80597246849601 | 20.43583233320001 |
| H | 11.23784741180661 | 28.63598423455584 | 20.73247193016300 |
| C | 11.58953316365314 | 24.07113897117242 | 19.52958727581241 |
| H | 12.42585586344853 | 23.39000168270186 | 19.27379347285547 |
| H | 10.90432467851229 | 24.09416156245963 | 18.65791522999216 |
| C | 10.82182747510001 | 23.53071957114109 | 20.72710772921401 |
| C | 11.47598150300729 | 23.35512302969778 | 21.97439016293726 |
| C | 13.53437023493530 | 23.54716339532065 | 23.21535162635274 |
| H | 14.58386487273180 | 23.79996965288949 | 22.97583084884239 |
| H | 13.12703029782995 | 24.29333150688772 | 23.92760533877169 |
| H | 13.50413245478139 | 22.54021073789481 | 23.68932274364293 |
| C | 10.72487565496937 | 23.01691429189087 | 23.12046798719095 |
| H | 11.21025923835451 | 22.95934794339123 | 24.10196897418858 |
| C | 9.33464415401165  | 22.80617869398268 | 23.04727650178819 |
| C | 8.69636231438625  | 22.91235055753380 | 21.78574272484954 |
| C | 6.64707172417360  | 22.77473085927447 | 20.52181213842153 |
| H | 7.04602775616726  | 22.04072042044454 | 19.78701478891289 |
| H | 5.58689668667750  | 22.53961476376497 | 20.73001074934633 |
| H | 6.71219875347390  | 23.79182140584594 | 20.07435040448550 |
| C | 9.44215696765371  | 23.27797847629137 | 20.64823980485241 |
| H | 8.94784018966698  | 23.43374779779878 | 19.68264431118049 |
| C | 15.92752685406568 | 29.90624790914224 | 22.18437218484275 |
| H | 16.40241944161234 | 30.37617754312346 | 21.31058832677920 |
| C | 16.58278356630460 | 29.92837497406522 | 23.42515400519452 |
| H | 17.57459353821601 | 30.39387987115132 | 23.50918499922800 |
| C | 17.12094081518094 | 33.08717793464783 | 28.06412143203750 |
| C | 16.96347872891632 | 33.07266327498429 | 26.63467659012945 |
| H | 16.89747225090333 | 34.02317838346595 | 26.09600057328297 |
| C | 16.85712522801430 | 31.89446347287070 | 25.92235741681082 |



|   |                   |                   |                   |
|---|-------------------|-------------------|-------------------|
| H | 16.65133501541181 | 31.94112085338046 | 24.84807300622673 |
| C | 16.95028225799831 | 30.61091418893226 | 26.56644402481413 |
| C | 16.58079592647882 | 29.37727324794542 | 25.92946562619015 |
| C | 16.91790631058305 | 26.92321702768551 | 28.88411787147460 |
| C | 18.03280321879473 | 26.12841556708460 | 29.22510449742667 |
| H | 18.98278358712327 | 26.27044492814898 | 28.68941527078260 |
| C | 17.95926528945600 | 25.22988759996815 | 30.30292738007721 |
| H | 18.85473495324083 | 24.66086807907911 | 30.59567503605303 |
| C | 16.78021908452612 | 25.10303131917918 | 31.06628204779116 |
| C | 16.76407863730818 | 24.25689481598345 | 32.33412843337402 |
| H | 16.29728619549372 | 23.27096835368225 | 32.12387055719805 |
| H | 17.81694711680787 | 24.04427180946132 | 32.61757706946945 |
| C | 15.64036738744871 | 25.82790880135504 | 30.66188204715821 |
| H | 14.71434321633979 | 25.75093709794739 | 31.24985678779744 |
| C | 15.70737141411994 | 26.72717781381102 | 29.58854015782216 |
| H | 14.83771936573470 | 27.35162137259276 | 29.34973850264166 |
| C | 16.60019593571002 | 28.18173622903194 | 26.68739430005673 |
| H | 16.25532665716329 | 27.25231961415759 | 26.21505372882901 |
| C | 13.85667494973691 | 38.19859593505124 | 36.01427015645019 |
| H | 14.46546979946769 | 39.07495469600022 | 36.31852430117662 |
| H | 12.91874050239874 | 38.23467102009223 | 36.60467600145319 |
| C | 12.29295936484801 | 34.38742353234599 | 35.09910084980218 |
| H | 12.91808999254616 | 33.99167416854054 | 34.27337756598624 |
| H | 12.20936401014002 | 33.61805790298903 | 35.89792475528599 |
| H | 11.28318585462214 | 34.61420503257523 | 34.71221060177473 |
| N | 11.79076601414443 | 31.12513254307311 | 33.41214310738426 |
| N | 11.64395934311795 | 30.12397747838610 | 25.12436670464625 |
| C | 11.63428487457267 | 29.53423306654726 | 28.71397593607299 |
| H | 11.46122875734590 | 30.39833314955225 | 28.06657737252424 |
| N | 12.18167177248621 | 26.60177955721984 | 33.82342131307983 |

|   |                   |                   |                   |
|---|-------------------|-------------------|-------------------|
| C | 11.96939625360037 | 28.74737041497933 | 32.37149483526331 |
| C | 11.86724380103448 | 30.03993062054139 | 32.96192332697685 |
| C | 12.04392412342343 | 27.27814307867137 | 30.36397809243693 |
| H | 12.20403275666780 | 26.41240317869098 | 31.01896037519937 |
| C | 11.81375019797423 | 28.07147981523932 | 26.70128570157602 |
| C | 11.68028116936392 | 29.70284737824350 | 30.08121829028758 |
| H | 11.54209231817901 | 30.70191927876661 | 30.50823640644951 |
| C | 11.90405763707510 | 28.58365188438942 | 30.95930924757836 |
| C | 11.99880672029078 | 27.11025236120451 | 28.99741765679594 |
| H | 12.13108516232829 | 26.11081505212298 | 28.56207496873504 |
| C | 11.80717060720557 | 28.23612555376884 | 28.11765269583407 |
| N | 12.18966691256126 | 25.74871209214226 | 25.59144842125961 |
| C | 11.69798984828311 | 29.18368376750163 | 25.82897068514935 |
| C | 12.10507860918831 | 27.60789928551621 | 33.21668808186460 |
| C | 12.01731020241236 | 26.79984179929269 | 26.09043404361930 |
| N | 14.27783249970289 | 33.69851276074940 | 32.32930932631093 |
| N | 11.43773779229774 | 35.56214313931387 | 24.81544026179886 |
| C | 12.90598282597013 | 33.82989825715607 | 27.57873928485043 |
| H | 12.42109586738499 | 34.79821841638638 | 27.41109526599552 |
| N | 15.03657617409545 | 29.51492557443441 | 31.18628427684101 |
| C | 14.33777513590996 | 31.90477299826265 | 30.44418621636449 |
| C | 14.28616239351860 | 32.87896408241848 | 31.48528328091968 |
| C | 14.14806076361750 | 31.32863936405162 | 28.00854921785118 |
| H | 14.60002968828034 | 30.34843063232216 | 28.19532843887288 |
| C | 12.78240679697219 | 33.35541946873940 | 25.14568536066324 |
| C | 13.34552969233051 | 33.50782338690728 | 28.83890640590951 |
| H | 13.21579542956366 | 34.22482116156005 | 29.65308306064949 |
| C | 13.96205157612437 | 32.23656111845480 | 29.11130204150499 |
| C | 13.80472841646302 | 31.69442253353984 | 26.72327459032370 |
| H | 13.99776673331444 | 31.01553746018337 | 25.88660618103075 |

|   |                   |                   |                   |
|---|-------------------|-------------------|-------------------|
| C | 13.15119116589792 | 32.95403545191588 | 26.45846324434654 |
| N | 13.43921964634640 | 32.14973171868014 | 22.93816572171129 |
| C | 12.05595742724007 | 34.56845459198160 | 24.94166271071019 |
| C | 14.73899945562767 | 30.59493207275623 | 30.82269666684276 |
| C | 13.13452203011532 | 32.63808936256060 | 23.96467709814811 |

## 7. References

- S1. V. S. Vyas, S. V. Lindeman and R. Rathore, *J. Photochem. Photobiol. A: Chem.*, 2019, **375**, 209–218.
- S2. F. Neese, *WIREs. Comput. Mol. Sci.*, 2022, **12**, e1606.
- S3. A. D. Becke, *Phys. Rev. A.*, 1988, **38**, 3098–3100.
- S4. C. Lee, W. Yang and R. G. Parr, *Phys. Rev. B.*, 1988, **37**, 785–789.
- S5. B. Miehlich, A. Savin, H. Stoll and H. Preuss, *Chem. Phys. Lett.*, 1989, **157**, 200–206.
- S6. F. Weigend and R. Ahlrichs, *Phys. Chem. Chem. Phys.*, 2005, **7**, 3297–3305.
- S7. F. Weigend, *Phys. Chem. Chem. Phys.*, 2006, **8**, 1057–1065.
- S8. S. Grimme, S. Ehrlich and L. Goerigk, *J. Comp. Chem.*, 2011, **32**, 1456–1465.
- S9. T. Lu and F. Chen, *J. Comput. Chem.*, 2012, **33**, 580–592.
- S10. W. Humphrey, A. Dalke and K. Schulten, *J. Molec. Graphics*, 1996, **14**, 33–38.
